# Supplementary material for: A catalytic enantioselective approach to tetrol bearing vicinal all-carbon quaternary stereogenic centers
Source: Royal Society of Chemistry journal article supplement (doi:10.1039/c7cc00457e), 2017-01-01

## Supporting Information

### Catalytic Enantioselective Approach to Tetrol Bearing Vicinal All-Carbon Quaternary Stereogenic Centers

Hui Yang, Kou-Sen Cao, Wen-Hua Zheng\*

State Key Laboratory of Coordination Chemistry, School of Chemistry and Chemical Engineering, Nanjing University, 163 Xianlin Avenue, Nanjing, Jiangsu 210023, China

E-mail: [wzheng@nju.edu.cn](mailto:wzheng@nju.edu.cn)

## Table of Contents

|                                                             |         |
|-------------------------------------------------------------|---------|
| General Information.....                                    | S2      |
| General Procedure for Preparation of Substrates.....        | S3-S9   |
| Procedure for Preparation of Dimethyldioxirane (DMDO).....  | S9      |
| General Procedure for Oxidative Desymmetrization.....       | S9-S14  |
| General Procedure for the Conversion of 2g.....             | S15-S17 |
| Determination of the Absolute Stereochemistry.....          | S17-S18 |
| Determination of the relative configuration of acetals..... | S18-S19 |
| Proposed transition state.....                              | S20     |
| References.....                                             | S20     |
| NMR and HPLC Spectra.....                                   | S21-S84 |

## General Information

Unless stated otherwise, all reactions were carried out in flame-dried glassware under a dry argon atmosphere. All solvents were purified and dried according to standard methods prior to use. Melting points were measured on a SGW X-4. Melting points are uncorrected. NMR spectras were recorded on Bruker ARX 300 spectrometer and Bruker ARX 400 spectrometer, which were recorded in ppm ( $\delta$ ) downfield of TMS ( $\delta = 0$ ) in deuterated solvent. Signal splitting patterns are described as singlet (s), doublet (d), triplet (t), quartet (q), quintet (quint), or multiplet (m), with coupling constants (J) in hertz. Mass spectra were conducted at Micromass Q-ToF instrument (ESI) and Agilent Technologies 5973N (EI). HPLC analyses were performed on Shimadzu SPD-20A using Daicel Chiralpak AD-H, IB Column. Values of optical rotation were measured on Rudolph Automatic Polarimeter A21101 at the wavelength of the sodium D-line (589 nm).

Diesters **11**<sup>1</sup> and tetraester **12**<sup>2</sup> were prepared following procedures in the literature.

### General Procedure for Preparation of 7a-7f

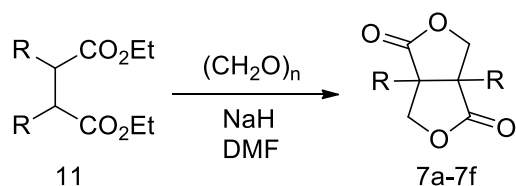

To a solution of diester **11**<sup>1</sup> (10 mmol) and paraformaldehyde (0.9 g, 30 mmol) in DMF (10 mL) was added NaH (0.12 g, 3 mmol). The reaction was allowed to stir at 50 °C until the starting material disappeared. The reaction mixture was diluted with ethyl acetate and quenched by saturated  $\text{NH}_4\text{Cl}$ . Then the organic layer was washed with brine, dried over  $\text{MgSO}_4$ , and concentrated in vacuo. The residue was purified by silica gel column chromatography (ethyl acetate / petroleum ether) to give the product **7a-7f** (62-95% yield) as white solid.

#### 3a,6a-diphenyltetrahydro-1H,4H-furo[3,4-c]furan-1,4-dione (7a)

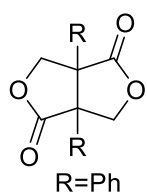

White solid. Analytical data for **7a**: mp: 148-149 °C.  $^1\text{H}$  NMR (300 MHz,  $\text{CDCl}_3$ )  $\delta$  7.36-7.22 (m, 6H), 6.92-6.80 (m, 4H), 5.13 (d,  $J$  = 9.6 Hz, 2H), 4.87 (d,  $J$  = 9.6 Hz, 2H).  $^{13}\text{C}$  NMR (75 MHz,  $\text{CDCl}_3$ )  $\delta$  176.58, 130.86, 129.13, 128.99, 127.38, 72.16, 60.95. IR (neat,  $\text{cm}^{-1}$ ):  $\nu$  = 1766, 1486, 1446, 1258, 1164, 1024, 948, 752, 731. HRMS (EI)  $m/z$   $\text{M}^+$ : Calcd for  $\text{C}_{18}\text{H}_{14}\text{O}_4$ : 294.0892. Found: 294.0896.

#### 3a,6a-bis(4-methoxyphenyl)tetrahydro-1H,4H-furo[3,4-c]furan-1,4-dione (7b)

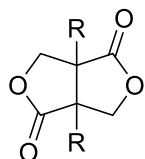

White solid. Analytical data for **7b**: mp: 174 °C.  $^1\text{H}$  NMR (400 MHz,  $\text{CDCl}_3$ )  $\delta$  6.76 (s, 8H), 5.03 (d,  $J$  = 9.6 Hz, 2H), 4.72 (d,  $J$  = 9.6 Hz, 2H), 3.76 (s, 6H).  $^{13}\text{C}$  NMR (101 MHz,  $\text{CDCl}_3$ )  $\delta$  176.86, 159.75, 128.73, 122.60, 114.46, 72.29, 60.33, 55.32. IR (neat,  $\text{cm}^{-1}$ ):  $\nu$  = 1773, 1609, 1516, 1485, 1300, 1252, 1185, 1058, 1024, 802. HRMS (ESI)  $m/z$   $[\text{M}+\text{Na}]^+$ : Calcd for  $\text{C}_{20}\text{H}_{18}\text{O}_6\text{Na}$ : 377.1001. Found: 377.0985.

#### 3a,6a-bis(4-chlorophenyl)tetrahydro-1H,4H-furo[3,4-c]furan-1,4-dione (7c)

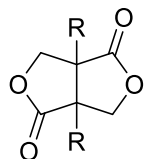

White solid. Analytical data for **7c**: mp: 176 °C.  $^1\text{H}$  NMR (300 MHz,  $\text{CDCl}_3$ )  $\delta$  7.34-7.23 (m, 4H), 6.88-6.75 (m, 4H), 5.11 (d,  $J$  = 9.7 Hz, 2H), 4.78 (d,  $J$  = 9.7 Hz, 2H).  $^{13}\text{C}$  NMR (75 MHz,  $\text{CDCl}_3$ )  $\delta$  175.70, 135.48, 129.53, 129.18, 128.74, 72.13, 60.30. IR (neat,  $\text{cm}^{-1}$ ):  $\nu$  = 1775, 1497, 1279, 1157, 1097, 1036, 856, 807, 737. HRMS (ESI)  $m/z$   $[\text{M}+\text{Na}]^+$ : Calcd for  $\text{C}_{18}\text{H}_{12}\text{Cl}_2\text{O}_4\text{Na}$ : 385.0010. Found: 384.9995.

#### 3a,6a-di-p-tolyltetrahydro-1H,4H-furo[3,4-c]furan-1,4-dione (7d)

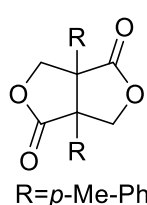

White solid. Analytical data for **7d**: mp: 200-202 °C.  $^1\text{H}$  NMR (400 MHz,  $\text{CDCl}_3$ )  $\delta$  7.03 (d,  $J$  = 8.2 Hz, 4H), 6.73 (d,  $J$  = 8.3 Hz, 4H), 5.05 (d,  $J$  = 9.5 Hz, 2H), 4.79 (d,  $J$  = 9.5 Hz, 2H), 2.28 (s, 6H).  $^{13}\text{C}$  NMR (101 MHz,  $\text{CDCl}_3$ )  $\delta$  176.78, 138.90, 129.76, 127.86, 127.24, 72.23, 60.44, 21.02. IR (neat,  $\text{cm}^{-1}$ ):  $\nu$  = 1772, 1517, 1250, 1150, 1061, 1015, 957, 793, 724. HRMS (ESI)  $m/z$   $[\text{M}+\text{Na}]^+$ : Calcd for  $\text{C}_{20}\text{H}_{18}\text{O}_4\text{Na}$ : 345.1103. Found: 345.1085.

**3a,6a-bis(3-(trifluoromethyl)phenyl)tetrahydro-1H,4H-furo[3,4-c]furan-1,4-dione (7e)**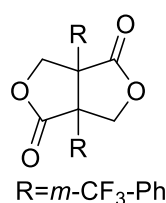

White solid. Analytical data for **7e**: mp: 168-170 °C. <sup>1</sup>H NMR (400 MHz, CDCl<sub>3</sub>) δ 7.58 (d, *J* = 7.8 Hz, 2H), 7.46 (t, *J* = 7.9 Hz, 2H), 7.15 (d, *J* = 7.9 Hz, 2H), 6.84 (s, 2H), 5.13 (d, *J* = 9.9 Hz, 2H), 4.81 (d, *J* = 9.9 Hz, 2H). <sup>13</sup>C NMR (101 MHz, CDCl<sub>3</sub>) δ 175.16, 131.66, 131.61, 130.83, 130.06, 126.15 (q, *J*<sub>C-F</sub> = 16.0 Hz), 124.44, 124.35 (q, *J*<sub>C-F</sub> = 16.0 Hz), 72.18, 61.26. <sup>19</sup>F NMR (376 MHz, CDCl<sub>3</sub>) δ -63.20. IR (neat, cm<sup>-1</sup>): ν = 1775, 1462, 1326, 1159, 1119, 1016, 891, 790. HRMS (EI) *m/z* *M*<sup>+</sup>:

Calcd for C<sub>20</sub>H<sub>12</sub>F<sub>6</sub>O<sub>4</sub>: 430.0640. Found: 430.0638.

**3a,6a-di(naphthalen-2-yl)tetrahydro-1H,4H-furo[3,4-c]furan-1,4-dione (7f)**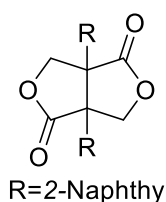

White solid. Analytical data for **7f**: mp: 228-230 °C. <sup>1</sup>H NMR (400 MHz, CDCl<sub>3</sub>) δ 7.79-7.63 (m, 4H), 7.60-7.43 (m, 8H), 6.77 (dd, *J* = 8.7, 2.1 Hz, 2H), 5.23 (d, *J* = 9.6 Hz, 2H), 5.04 (d, *J* = 9.6 Hz, 2H). <sup>13</sup>C NMR (101 MHz, CDCl<sub>3</sub>) δ 176.52, 132.94, 132.82, 128.90, 128.18, 128.10, 127.57, 127.40, 127.22, 126.96, 124.14, 72.55, 61.11. IR (neat, cm<sup>-1</sup>): ν = 1771, 1450, 1275, 1157, 1028, 1009, 993, 861, 745. HRMS (ESI) *m/z* [*M*+Na]<sup>+</sup>: Calcd for C<sub>26</sub>H<sub>18</sub>O<sub>4</sub>Na: 417.1103. Found:

417.1084.

**General Procedure for Preparation of 1a-1f<sup>3</sup>**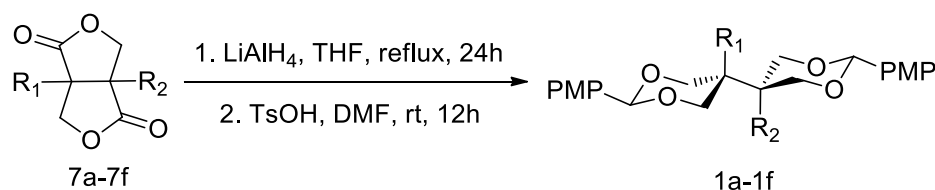

A solution of **7** (10 mmol) in 30 mL of dry THF was added slowly to a suspension of 1.9 g (50 mmol) LiAlH<sub>4</sub> in 20 mL of dry THF. The reaction mixture was refluxed for 24 hours. It was then cooled to 0 °C and 20 mL of water in 20 mL of ethanol was added slowly with vigorous stirring and then filtered. The precipitate was refluxed in CH<sub>3</sub>OH (three 50-mL portions) and filtered. The combined filtrate was concentrated. Then 10 mL of MeOH was added. It was neutralized (to pH 1-2) with concentrated hydrochloric acid and concentrated. Then, TsOH (5%), *p*-Anisaldehyde dimethyl acetal (30 mmol), and DMF (15 mL) was added. The reaction mixture was allowed to stir at room temperature for 6-12 hours. The reaction mixture was diluted with ethyl acetate and H<sub>2</sub>O. Then the organic layer was washed with brine, dried over MgSO<sub>4</sub>, and concentrated in vacuo. The residue was purified by silica gel column chromatography (ethyl acetate / petroleum ether) to give the product **1a-1f** as white solid in 16-28% yields for two steps.

**(2,5-*cis*,2',5'-*cis*)-2,2'-bis(4-methoxyphenyl)-5,5'-diphenyl-5,5'-bi(1,3-dioxane) (1a)**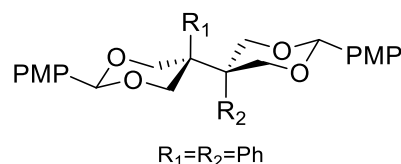

White solid. Analytical data for **1a**: mp: 293-295 °C. <sup>1</sup>H NMR (400 MHz, CDCl<sub>3</sub>) δ 7.45-7.20 (m, 10H), 6.92 (d, *J* = 8.4 Hz, 4H), 6.69 (d, *J* = 8.4 Hz, 4H), 5.33 (s, 2H), 4.74 (d, *J* = 11.1 Hz, 4H), 4.13 (d, *J* = 11.2 Hz, 4H), 3.68 (s, 6H). <sup>13</sup>C NMR (101 MHz, CDCl<sub>3</sub>) δ 160.09, 137.59, 130.47, 129.35, 127.96, 127.62,

126.75, 113.65, 102.28, 70.61, 55.27, 44.91. IR (neat, cm<sup>-1</sup>): ν = 1613, 1518, 1390, 1304, 1249, 1104, 1029, 979, 829, 702. HRMS (ESI) *m/z* [*M*+Na]<sup>+</sup>: Calcd for C<sub>34</sub>H<sub>34</sub>O<sub>6</sub>Na: 561.2253. Found: 561.2254.

**(2,5-*cis*,2',5'-*cis*)-2,2',5,5'-tetrakis(4-methoxyphenyl)-5,5'-bi(1,3-dioxane) (1b)**

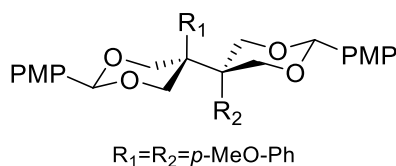

White solid. Analytical data for **1b**: mp: 236-237 °C. <sup>1</sup>H NMR (400 MHz, CDCl<sub>3</sub>) δ 7.20-7.15 (m, 4H), 6.99-6.94 (m, 4H), 6.94-6.88 (m, 4H), 6.74-6.69 (m, 4H), 5.34 (s, 2H), 4.67 (d, *J* = 11.2 Hz, 4H), 4.12 (d, *J* = 11.3 Hz, 4H), 3.86 (s, 6H), 3.71 (s, 6H). <sup>13</sup>C NMR (101 MHz, CDCl<sub>3</sub>) δ 158.99, 156.95, 129.42, 129.30, 128.48, 126.53, 112.56, 112.15, 101.16, 69.62, 54.18, 43.40. IR (neat, cm<sup>-1</sup>): ν = 1612, 1517, 1375, 1245, 1124, 1082, 1026, 845, 807. HRMS (ESI) *m/z* [M+Na]<sup>+</sup>: Calcd for C<sub>36</sub>H<sub>38</sub>O<sub>8</sub>Na: 621.2464. Found: 621.2466.

**(2,5-*cis*,2',5'-*cis*)-5,5'-bis(4-chlorophenyl)-2,2'-bis(4-methoxyphenyl)-5,5'-bi(1,3-dioxane) (1c)**

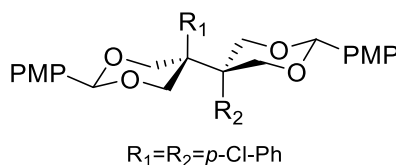

White solid. Analytical data for **1c**: mp: 234-235 °C. <sup>1</sup>H NMR (400 MHz, CDCl<sub>3</sub>) δ 7.37-7.32 (m, 4H), 7.17-7.11 (m, 4H), 7.00-6.94 (m, 4H), 6.77-6.72 (m, 4H), 5.38 (s, 2H), 4.65 (d, *J* = 11.2 Hz, 4H), 4.14 (d, *J* = 11.3 Hz, 4H), 3.72 (s, 6H). <sup>13</sup>C NMR (101 MHz, CDCl<sub>3</sub>) δ 160.18, 135.85, 132.84, 130.68, 129.96, 128.13, 127.50, 113.69, 102.40, 70.41, 55.25, 44.80. IR (neat, cm<sup>-1</sup>): ν = 1614, 1515, 1386, 1244, 1123, 1079, 1024, 971, 839, 804, 750. HRMS (ESI) *m/z* [M+Na]<sup>+</sup>: Calcd for C<sub>34</sub>H<sub>32</sub>Cl<sub>2</sub>O<sub>6</sub>Na: 629.1474. Found: 629.1473.

**(2,5-*cis*,2',5'-*cis*)-2,2'-bis(4-methoxyphenyl)-5,5'-di-*p*-tolyl-5,5'-bi(1,3-dioxane) (1d)**

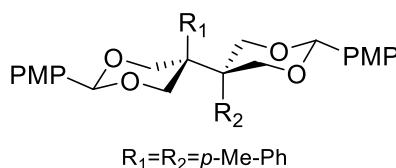

White solid. Analytical data for **1d**: mp: 200 °C. <sup>1</sup>H NMR (400 MHz, CDCl<sub>3</sub>) δ 7.21 (s, 8H), 7.02-6.96 (m, 4H), 6.76-6.71 (m, 4H), 5.34 (s, 2H), 4.72 (d, *J* = 11.2 Hz, 4H), 4.11 (d, *J* = 11.3 Hz, 4H), 3.71 (s, 6H), 2.42 (s, 6H). <sup>13</sup>C NMR (101 MHz, CDCl<sub>3</sub>) δ 160.02, 136.09, 134.60, 130.59, 129.17, 128.65, 127.58, 113.60, 102.17, 70.66, 55.23, 44.51, 21.05. IR (neat, cm<sup>-1</sup>): ν = 1612, 1516, 1385, 1248, 1173, 1121, 1020, 922, 830, 773. HRMS (ESI) *m/z* [M+Na]<sup>+</sup>: Calcd for C<sub>34</sub>H<sub>38</sub>O<sub>6</sub>Na: 589.2566. Found: 589.2575.

**(2,5-*cis*,2',5'-*cis*)-2,2'-bis(4-methoxyphenyl)-5,5'-bis(3-(trifluoromethyl)phenyl)-5,5'-bi(1,3-dioxane) (1e)**

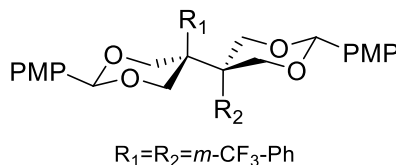

White solid. Analytical data for **1e**: mp: 285 °C. <sup>1</sup>H NMR (400 MHz, CDCl<sub>3</sub>) δ 7.64-7.58 (m, 2H), 7.54-7.46 (m, 2H), 7.42-7.34 (m, 2H), 7.33-7.26 (m, 2H), 7.01-6.94 (m, 4H), 6.80-6.72 (m, 4H), 5.50 (s, 2H), 4.76 (d, *J* = 11.2 Hz, 4H), 4.33 (d, *J* = 11.4 Hz, 4H), 3.75 (s, 6H). <sup>13</sup>C NMR (101 MHz, CDCl<sub>3</sub>) δ 160.20, 138.20, 132.36, 130.36 (d, *J*<sub>C-F</sub> = 132 Hz), 129.68, 128.42, 127.45, 125.85 (q, *J*<sub>C-F</sub> = 16.0 Hz), 125.42, 123.94 (q, *J*<sub>C-F</sub> = 16.0 Hz), 113.67, 102.40, 70.17, 55.22, 45.47. <sup>19</sup>F NMR (376 MHz, CDCl<sub>3</sub>) δ -62.76. IR (neat, cm<sup>-1</sup>): ν = 1614, 1517, 1394, 1331, 1244, 1125, 1032, 928, 831, 770. HRMS (ESI) *m/z* [M+Na]<sup>+</sup>: Calcd for C<sub>34</sub>H<sub>32</sub>F<sub>6</sub>O<sub>6</sub>Na: 697.2001. Found: 697.2004.

**(2,5-*cis*,2',5'-*cis*)-2,2'-bis(4-methoxyphenyl)-5,5'-di(naphthalen-2-yl)-5,5'-bi(1,3-dioxane) (1f)**

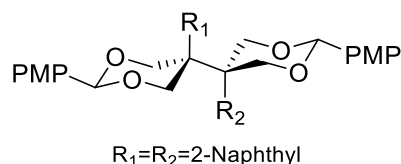

White solid. Analytical data for **1f**: mp: 243 °C.  $^1\text{H}$  NMR (400 MHz,  $\text{CDCl}_3$ )  $\delta$  7.94-7.86 (m, 4H), 7.86-7.79 (m, 4H), 7.58-7.47 (m, 6H), 6.99-6.88 (m, 4H), 6.69-6.60 (m, 4H), 5.35 (s, 2H), 4.97 (d,  $J = 11.2$  Hz, 4H), 4.27 (d,  $J = 11.5$  Hz, 4H), 3.65 (s, 6H).  $^{13}\text{C}$  NMR (101 MHz,  $\text{CDCl}_3$ )  $\delta$  160.02, 135.23, 133.00, 132.19, 130.22, 128.92, 128.44, 127.53, 127.40, 127.33, 127.06, 126.15, 125.99, 113.57, 102.41, 70.79, 55.18, 45.41. IR (neat,  $\text{cm}^{-1}$ ):  $\nu = 1612, 1514, 1377, 1242, 1170, 1134, 1074, 1026, 806, 777$ . HRMS (ESI)  $m/z$   $[\text{M}+\text{Na}]^+$ : Calcd for  $\text{C}_{42}\text{H}_{38}\text{O}_6\text{Na}$ : 661.2566. Found: 661.2563.

### General Procedure for Preparation of **1g**, **1l**<sup>3</sup>

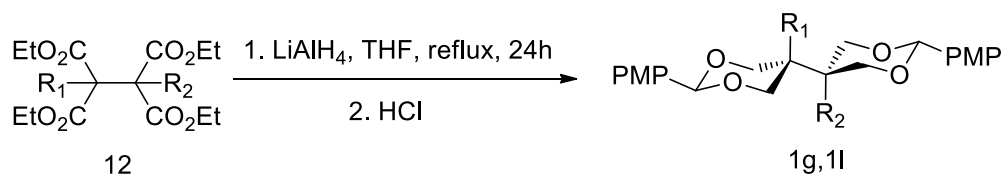

A solution of tetraester **12**<sup>2</sup> (10 mmol) in 30 mL of dry THF was added slowly with cooling and vigorous stirring to a suspension of 1.9g (50 mmol) lithium aluminum hydride in 20 mL of dry THF. The reaction mixture was refluxed for 24h. It was then cooled to 0 °C and 20 mL of water in 20 mL of ethanol was added slowly with vigorous and filtered. The precipitate was refluxed in  $\text{CH}_3\text{OH}$  (three 50-mL portions) and then filtered. The combined filtrate was concentrated. 10 mL of MeOH was added. It was neutralized (to pH 1-2) with concentrated hydrochloric acid and concentrated. Then, *p*-Anisaldehyde dimethyl acetal (30 mmol) and 3 drops of concentrated hydrochloric acid was added. The reaction mixture was allowed to stir at 55°C for 30 min. After completion of the reaction,  $\text{Et}_2\text{O}$  (30 mL) was added and filtered. The obtained white solid was washed with  $\text{H}_2\text{O}$  and  $\text{Et}_2\text{O}$  to give the product in 52% (**1g**) and 45% (**1l**) yields for two steps.

### (2,5-*cis*,2',5'-*cis*)-2,2'-bis(4-methoxyphenyl)-5,5'-dimethyl-5,5'-bi(1,3-dioxane) (**1g**)

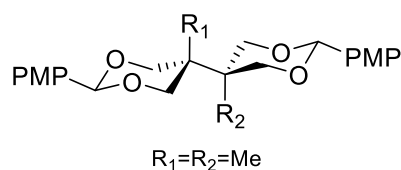

White solid. Analytical data for **1g**: mp: 196-197 °C.  $^1\text{H}$  NMR (400 MHz,  $\text{CDCl}_3$ )  $\delta$  7.44-7.38 (m, 4H), 6.94-6.86 (m, 4H), 5.35 (s, 2H), 4.05 (d,  $J = 10.8$  Hz, 4H), 3.87 (d,  $J = 11.1$  Hz, 4H), 3.81 (s, 6H), 1.37 (s, 6H).  $^{13}\text{C}$  NMR (101 MHz,  $\text{CDCl}_3$ )  $\delta$  160.12, 130.71, 127.40, 113.74, 101.84, 71.77, 55.34, 35.99, 16.10. IR (neat,  $\text{cm}^{-1}$ ):  $\nu = 1616, 1520, 1427, 1394, 1256, 1158, 1057, 975, 928, 829$ . HRMS (ESI)  $m/z$   $[\text{M}+\text{Na}]^+$ : Calcd for  $\text{C}_{24}\text{H}_{30}\text{O}_6\text{Na}$ : 437.1940. Found: 437.1946.

### (2,5-*cis*,2',5'-*cis*)-2,2'-bis(4-methoxyphenyl)-5-methyl-5,5'-bi(1,3-dioxane) (**1l**)

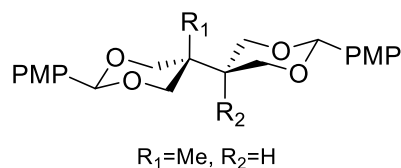

White solid. Analytical data for **1l**: mp: 187-189 °C.  $^1\text{H}$  NMR (400 MHz,  $d^6$ -acetone)  $\delta$  7.48-7.32 (m, 4H), 7.01-6.84 (m, 4H), 5.54 (s, 1H), 5.52 (s, 1H), 4.44-4.32 (m, 2H), 4.16-4.06 (m, 2H), 4.06-3.95 (m, 2H), 3.80 (s, 3H), 3.79 (s, 3H), 3.64-3.55 (m, 2H), 2.70-2.59 (m, 1H), 0.78 (s, 3H).  $^{13}\text{C}$  NMR (101 MHz,  $d^6$ -acetone)  $\delta$  160.91, 160.73, 132.79, 132.23, 128.43, 128.37, 114.15, 113.98, 102.29, 102.02, 75.00, 69.59, 55.53, 55.50, 38.16, 33.48, 16.94. IR (neat,  $\text{cm}^{-1}$ ):  $\nu = 1613, 1515, 1385, 1249, 1170, 1099, 1023, 976, 820$ . HRMS (ESI)  $m/z$   $[\text{M}+\text{Na}]^+$ : Calcd for  $\text{C}_{23}\text{H}_{28}\text{O}_6\text{Na}$ : 423.1784. Found: 423.1783.

### General Procedure for Preparation of 1h-1k, 1m-1p<sup>3</sup>

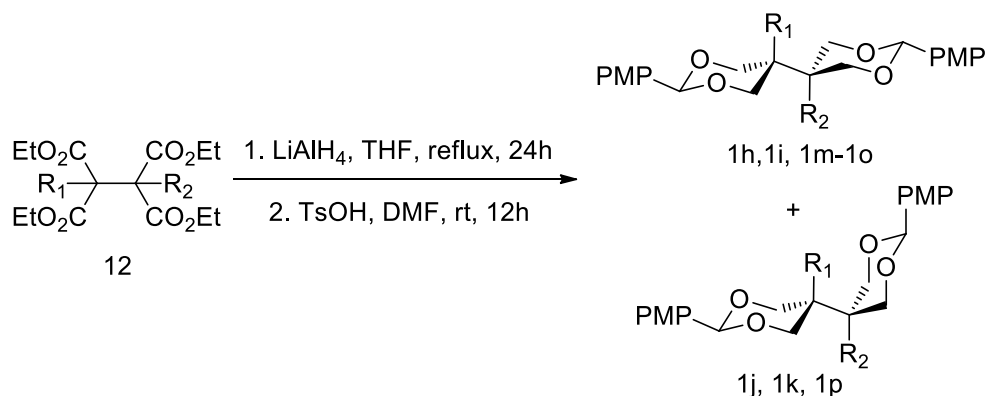

A solution of tetraester **12**<sup>2</sup> (10 mmol) in 30 ml of dry THF was added slowly dropwise with cooling and vigorous stirring to a suspension of 1.9g (50 mmol)  $\text{LiAlH}_4$  in 20 mL of dry THF. The reaction mixture was refluxed for 24h. It was then cooled to 0 °C and 20 mL of water in 20 mL of ethanol was added slowly with vigorous and filtered. The precipitate was refluxed in  $\text{CH}_3\text{OH}$  (three 50-mL portions) and then filtered. The combined filtrate was concentrated. 10 mL of MeOH was added. It was neutralized (to pH 1-2) with concentrated hydrochloric acid and concentrated. Then, TsOH (5%), *p*-Anisaldehyde dimethyl acetal (30 mmol), DMF (15 mL) was added. The reaction mixture was allowed to stir at rt for 6-12 hours. The reaction mixture was diluted with ethyl acetate and  $\text{H}_2\text{O}$ . Then the organic layer was washed with brine, dried over  $\text{MgSO}_4$ , and concentrated in vacuo. The residue was purified by silica gel column chromatography (ethyl acetate / petroleum ether) and recrystallized from  $\text{Et}_2\text{O}$  to give the product as white solid in 12%-32% yields for two steps.

#### (2,5-*cis*,2',5'-*cis*)-5,5'-diethyl-2,2'-bis(4-methoxyphenyl)-5,5'-bi(1,3-dioxane) (**1h**)

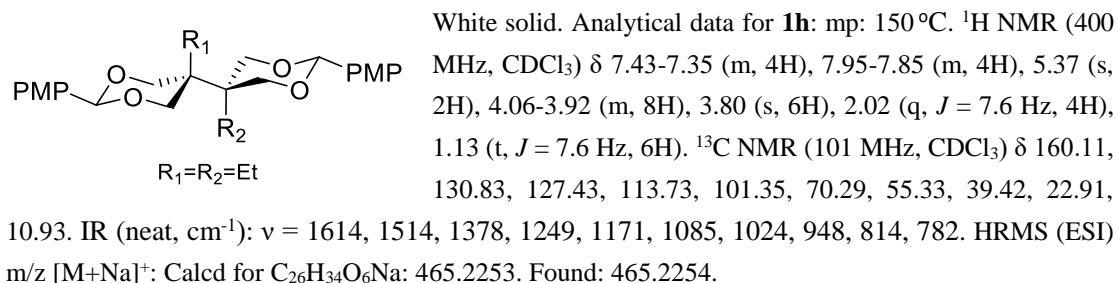

#### (2,5-*cis*,2',5'-*cis*)-5-benzyl-2,2'-bis(4-methoxyphenyl)-5'-methyl-5,5'-bi(1,3-dioxane) (**1i**)

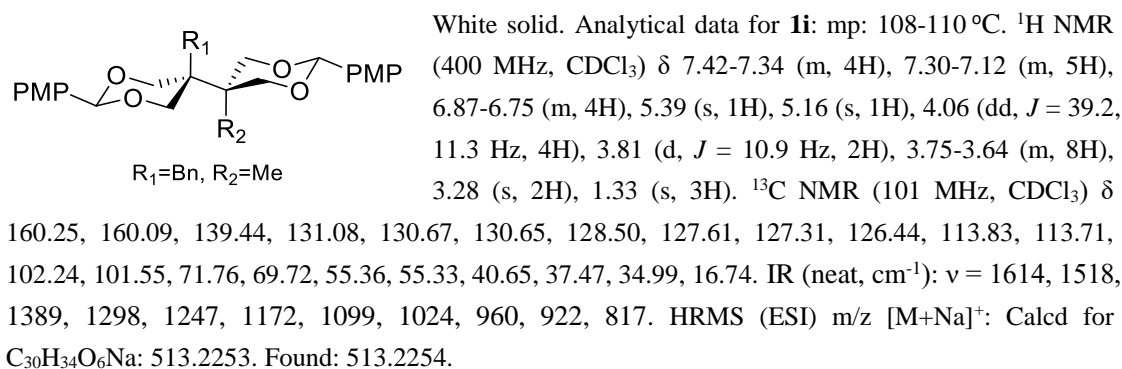

#### (2,5-*trans*,2',5'-*cis*)-5-benzyl-2,2'-bis(4-methoxyphenyl)-5'-methyl-5,5'-bi(1,3-dioxane) (**1j**)

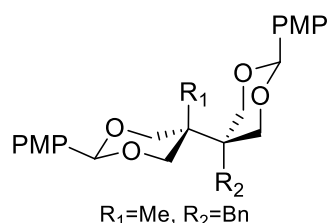

White solid. Analytical data for **1j**: mp: 175-176 °C.  $^1\text{H}$  NMR (400 MHz,  $\text{CDCl}_3$ )  $\delta$  7.45 (d,  $J = 8.5$  Hz, 2H), 7.38-7.27 (m, 5H), 7.09 (d,  $J = 6.9$  Hz, 2H), 6.91 (d,  $J = 8.6$  Hz, 2H), 6.85 (d,  $J = 8.6$  Hz, 2H), 5.45 (s, 1H), 5.07 (s, 1H), 4.46 (d,  $J = 11.5$  Hz, 4H), 4.20 (d,  $J = 11.3$  Hz, 2H), 3.85-3.70 (m, 4H), 2.49 (s, 2H), 1.60 (s, 3H).  $^{13}\text{C}$  NMR (101 MHz,  $\text{CDCl}_3$ )  $\delta$  160.05, 160.04, 136.51, 131.19, 130.82, 130.27, 128.48, 127.51, 127.49, 126.88, 113.74, 113.72, 101.75, 101.49, 74.48, 70.59, 55.34, 55.30, 38.68, 38.20, 36.34, 17.01. IR (neat,  $\text{cm}^{-1}$ ):  $\nu = 1614, 1518, 1391, 1299, 1249, 1172, 1100, 1025, 987, 818, 750$ . HRMS (ESI)  $m/z$   $[\text{M}+\text{Na}]^+$ : Calcd for  $\text{C}_{30}\text{H}_{34}\text{O}_6\text{Na}$ : 513.2253. Found: 513.2257.

**(2,5-cis,2',5'-trans)-2,2'-bis(4-methoxyphenyl)-5-methyl-5'-phenyl-5,5'-bi(1,3-dioxane) (1k)**

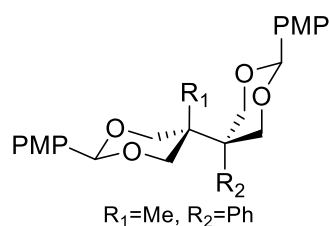

White solid. Analytical data for **1k**: mp: 172-174 °C.  $^1\text{H}$  NMR (400 MHz,  $\text{CDCl}_3$ )  $\delta$  7.66 (d,  $J = 7.6$  Hz, 2H), 7.51-7.40 (m, 4H), 7.35-7.25 (m, 1H), 7.05-6.98 (m, 2H), 6.96-6.90 (m, 2H), 6.76-6.70 (m, 2H), 5.57 (s, 1H), 5.44 (s, 1H), 5.14 (d,  $J = 11.7$  Hz, 2H), 4.59 (d,  $J = 11.7$  Hz, 2H), 4.38 (d,  $J = 12.4$  Hz, 2H), 3.82 (s, 3H), 3.72 (s, 3H), 3.50 (d,  $J = 12.5$  Hz, 2H), 0.61 (s, 3H).  $^{13}\text{C}$  NMR (101 MHz,  $\text{CDCl}_3$ )  $\delta$  160.22, 160.02, 139.05, 131.00, 130.38, 129.68, 127.97, 127.65, 127.61, 126.22, 113.86, 113.59, 102.57, 102.19, 74.99, 72.45, 55.36, 55.24, 46.43, 36.09, 16.80. IR (neat,  $\text{cm}^{-1}$ ):  $\nu = 1613, 1516, 1383, 1300, 1246, 1172, 1117, 1084, 1011, 821, 723$ . HRMS (ESI)  $m/z$   $[\text{M}+\text{Na}]^+$ : Calcd for  $\text{C}_{29}\text{H}_{32}\text{O}_6\text{Na}$ : 499.2097. Found: 499.2104.

**(2,5-cis,2',5'-cis)-5-isopropyl-2,2'-bis(4-methoxyphenyl)-5,5'-bi(1,3-dioxane) (1m)**

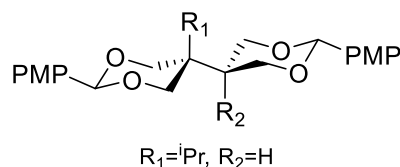

White solid. Analytical data for **1m**: mp: 125-126 °C.  $^1\text{H}$  NMR (400 MHz,  $\text{CDCl}_3$ )  $\delta$  7.42 (dd,  $J = 8.6, 1.8$  Hz, 4H), 6.89 (t,  $J = 9.3$  Hz, 4H), 5.45 (s, 1H), 5.33 (s, 1H), 4.47 (dd,  $J = 11.5, 3.7$  Hz, 2H), 4.27 (t,  $J = 11.2$  Hz, 2H), 4.16 (d,  $J = 12.1$  Hz, 2H), 3.79 (d,  $J = 4.9$  Hz, 6H), 3.74 (d,  $J = 12.1$  Hz, 2H), 2.60 – 2.49 (m, 1H), 1.64-1.53 (m, 1H), 0.96 (d,  $J = 7.0$  Hz, 6H).  $^{13}\text{C}$  NMR (101 MHz,  $\text{CDCl}_3$ )  $\delta$  160.11, 159.93, 131.17, 130.55, 127.55, 127.35, 113.78, 113.63, 101.52, 101.47, 72.80, 71.21, 55.33, 55.30, 37.83, 37.03, 32.20, 17.50. IR (neat,  $\text{cm}^{-1}$ ):  $\nu = 1612, 1513, 1378, 1244, 1173, 1094, 1028, 984, 813, 781$ . HRMS (ESI)  $m/z$   $[\text{M}+\text{Na}]^+$ : Calcd for  $\text{C}_{25}\text{H}_{32}\text{O}_6\text{Na}$ : 451.2097. Found: 451.2110.

**(2,5-cis,2',5'-cis)-5-benzyl-2,2'-bis(4-methoxyphenyl)-5,5'-bi(1,3-dioxane) (1n)**

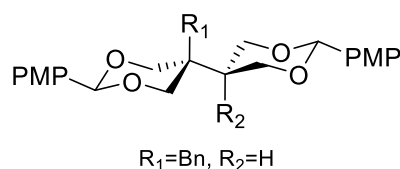

White solid. Analytical data for **1n**: mp: 164-165 °C.  $^1\text{H}$  NMR (400 MHz,  $\text{CDCl}_3$ )  $\delta$  7.53 (d,  $J = 8.6$  Hz, 2H), 7.43-7.28 (m, 7H), 6.95 (dd,  $J = 18.3, 8.6$  Hz, 4H), 5.51 (s, 1H), 5.38 (s, 1H), 4.25 (dd,  $J = 11.3, 3.7$  Hz, 2H), 4.06-3.88 (m, 6H), 3.85 (d,  $J = 8.9$  Hz, 6H), 3.26 (s, 2H), 2.28-2.14 (m, 1H).  $^{13}\text{C}$  NMR (101 MHz,  $\text{CDCl}_3$ )  $\delta$  160.26, 160.09, 137.40, 131.04, 130.67, 130.58, 128.52, 127.58, 127.33, 126.68, 113.84, 113.70, 102.38, 101.56, 71.52, 67.35, 55.37, 55.33, 37.43, 36.34, 35.88. IR (neat,  $\text{cm}^{-1}$ ):  $\nu = 1615, 1518, 1385, 1249, 1174, 1106, 1078, 1027, 964, 831, 874, 747$ . HRMS (ESI)  $m/z$   $[\text{M}+\text{Na}]^+$ : Calcd for  $\text{C}_{29}\text{H}_{32}\text{O}_6\text{Na}$ : 499.2097. Found: 499.2104.

**(2,5-trans,2',5'-cis)-2,2'-bis(4-methoxyphenyl)-5-phenyl-5,5'-bi(1,3-dioxane) (1o)**



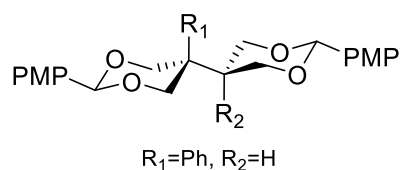

White solid. Analytical data for **1o**: mp: 211–213 °C.  $^1\text{H}$  NMR (400 MHz,  $\text{CDCl}_3$ )  $\delta$  7.52–7.38 (m, 3H), 7.35–7.28 (m, 2H), 7.19–7.10 (m, 2H), 6.90–6.70 (m, 4H), 5.56 (s, 1H), 5.20 (s, 1H), 4.75 (d,  $J = 11.4$  Hz, 2H), 4.24–4.04 (m, 4H), 3.79 (d,  $J = 5.6$  Hz, 3H), 3.74 (s, 3H), 3.66 (t,  $J = 11.4$  Hz, 2H), 2.40–2.30 (m, 1H).  $^{13}\text{C}$  NMR (101 MHz,  $\text{CDCl}_3$ )  $\delta$  160.12, 160.04, 139.04, 130.58, 130.33, 128.62, 127.75, 127.62, 127.26, 126.76, 113.65, 102.36, 101.51, 72.35, 68.04, 55.30, 55.27, 41.19, 39.89. IR (neat,  $\text{cm}^{-1}$ ):  $\nu = 1613, 1515, 1381, 1248, 1169, 1104, 1083, 1024, 823, 782$ . HRMS (ESI)  $m/z$   $[\text{M}+\text{Na}]^+$ : Calcd for  $\text{C}_{28}\text{H}_{30}\text{O}_6\text{Na}$ : 485.1940. Found: 485.1941.

**(2,5-*cis*,2',5'-*cis*)-2,2'-bis(4-methoxyphenyl)-5-phenyl-5,5'-bi(1,3-dioxane) (1p)**

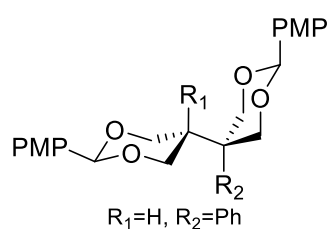

White solid. Analytical data for **1p**: mp: 165 °C.  $^1\text{H}$  NMR (400 MHz,  $\text{CDCl}_3$ )  $\delta$  7.47 (d,  $J = 8.5$  Hz, 2H), 7.40–7.25 (m, 5H), 7.04 (d,  $J = 7.6$  Hz, 2H), 6.92 (d,  $J = 8.5$  Hz, 2H), 6.84 (d,  $J = 8.6$  Hz, 2H), 5.38 (s, 1H), 5.25 (s, 1H), 4.70 (d,  $J = 11.6$  Hz, 2H), 4.38 (dd,  $J = 11.1, 3.5$  Hz, 2H), 3.95 (d,  $J = 11.6$  Hz, 2H), 3.88–3.70 (m, 8H), 3.04–2.93 (m, 1H).  $^{13}\text{C}$  NMR (101 MHz,  $\text{CDCl}_3$ )  $\delta$  160.26, 159.95, 139.72, 131.03, 130.30, 128.86, 127.69, 127.48, 127.38, 125.15, 113.81, 113.62, 101.86, 101.33, 72.86, 69.69, 55.37, 55.30, 39.29, 38.40. IR (neat,  $\text{cm}^{-1}$ ):  $\nu = 1614, 1517, 1382, 1245, 1130, 1087, 1033, 974, 807, 734$ . HRMS (ESI)  $m/z$   $[\text{M}+\text{Na}]^+$ : Calcd for  $\text{C}_{28}\text{H}_{30}\text{O}_6\text{Na}$ : 485.1940. Found: 485.1942.

**Procedure for Preparation of Dimethyldioxirane (DMDO)<sup>4</sup>**

To a vigorously stirring solution of 40 mL  $\text{H}_2\text{O}$ , 40 mL acetone, and 32g  $\text{NaHCO}_3$  at room temperature was added 60 g Oxone in a portion. Simultaneously, reduced pressure (ca. 30 mm, water aspirator) was connected to the receiving flask cooled by liquid nitrogen. After about 1 hour, the receiving flask was taken out, and the fresh DMDO was transferred to a 100 mL round flask. The DMDO was used directly without any further treatment. The concentration of DMDO is determined through titration ( $\sim 0.1$  mmol/mL).

**General Procedure for Oxidative Desymmetrization of 1a-1p<sup>5</sup>**

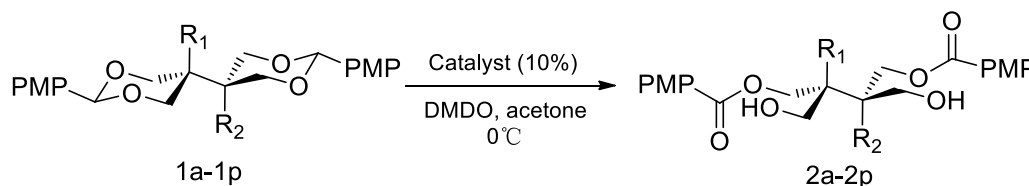

To a flame-dried Schlenk tube were added substrate **1** (0.025 mmol) and catalyst 10 mol%. The tube was put into ice-water bath. To the mixture was added 2 mL fresh-made DMDO\* ( $\sim 0.1$  mmol/mL). The mixture was stirred at 0 °C until the starting material disappeared (monitored by TLC). The solvent was removed under reduced pressure, and the residue was purified by silica gel column chromatography (DCM:  $\text{CH}_3\text{OH} = 20:1$ ) to afford a mixture of diastereomers **2** and **2'**.

(\*DMDO was used immediately after preparation, and the concentration of DMDO was determined to be  $\sim 0.1$  mmol/mL. The concentration dropped from  $\sim 0.1$  mmol/mL to  $\sim 0.07$  mmol/mL after storage for one week at  $-20^\circ\text{C}$ .)

**(2R, 3R)-2,3-bis(hydroxymethyl)-2,3-diphenylbutane-1,4-diyl bis(4-methoxybenzoate) (2a)**

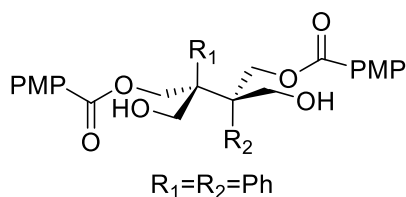

White solid, 94%, 15.8:1 d.r., >99% *ee*. Analytical data for **2a**:  $[\alpha]_D^{20} = +26.8^\circ$  ( $c = 0.38$ ,  $CH_3OH$ ). mp: 89-90 °C.  $^1H$  NMR (400 MHz,  $CDCl_3$ )  $\delta$  7.70 (d,  $J = 8.8$  Hz, 4H), 7.25-7.14 (m, 6H), 6.95-6.84 (m, 4H), 6.79 (d,  $J = 8.9$  Hz, 4H), 5.36 (d,  $J = 11.5$  Hz, 2H), 5.00 (d,  $J = 11.5$  Hz, 2H), 4.46 (d,  $J = 12.4$  Hz, 2H), 3.92 (d,  $J = 12.4$  Hz, 2H), 3.79 (s, 6H).  $^{13}C$  NMR (101 MHz,  $CDCl_3$ )  $\delta$  167.14, 163.56, 138.06, 131.72, 128.57, 127.45, 127.02, 121.90, 113.64, 63.09, 62.81, 55.41, 52.12. IR (neat,  $cm^{-1}$ ):  $\nu = 2920$ , 1705, 1604, 1511, 1253, 1166, 1101, 1026, 845, 767. HRMS (ESI)  $m/z$   $[M+Na]^+$ : Calcd for  $C_{34}H_{34}O_8Na$ : 593.2151. Found: 593.2161. The enantiomeric ratio was determined by Daicel Chiralpak AD-H, Hexanes/IPA = 80:20, 1.5 mL/min,  $\lambda = 254nm$ ,  $t_R$ (major) = 22.16 min,  $t_R$ (minor) = 32.99 min. Analytical data for the isomer of **2a**: white solid, mp: 83 °C.  $^1H$  NMR (400 MHz,  $CDCl_3$ )  $\delta$  7.87-7.78 (m, 4H), 7.26-7.20 (m, 6H), 7.00-6.93 (m, 4H), 6.89-6.82 (m, 4H), 5.14 (d,  $J = 11.8$  Hz, 2H), 4.98 (d,  $J = 11.7$  Hz, 2H), 4.40 (d,  $J = 12.1$  Hz, 2H), 4.15 (d,  $J = 12.1$  Hz, 2H), 3.81 (s, 6H).  $^{13}C$  NMR (101 MHz,  $CDCl_3$ )  $\delta$  166.82, 163.64, 137.82, 131.76, 128.54, 127.71, 127.18, 121.92, 113.77, 64.07, 62.73, 55.46, 52.81. HRMS (ESI)  $m/z$   $[M+Na]^+$ : Calcd for  $C_{34}H_{34}O_8Na$ : 593.2151. Found: 593.2158.

**(2R, 3R)-2,3-bis(hydroxymethyl)-2,3-bis(4-methoxyphenyl)butane-1,4-diyl bis(4-methoxybenzoate) (2b)**

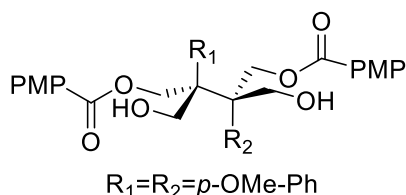

White solid, 93%, 18:1 d.r., >99% *ee*. Analytical data for **2b**:  $[\alpha]_D^{20} = +4.8^\circ$  ( $c = 0.63$ ,  $CH_3OH$ ). mp: 116 °C.  $^1H$  NMR (400 MHz,  $CDCl_3$ )  $\delta$  7.76-7.70 (m, 4H), 6.87-6.72 (m, 12H), 5.29 (d,  $J = 11.5$  Hz, 2H), 4.94 (d,  $J = 11.5$  Hz, 2H), 4.39 (d,  $J = 11.9$  Hz, 2H), 3.89 (d,  $J = 12.5$  Hz, 2H), 3.80 (d,  $J = 2.8$  Hz, 12H).  $^{13}C$  NMR (101 MHz,  $CDCl_3$ )  $\delta$  167.17, 163.57, 158.21, 131.74, 130.01, 129.69, 121.95, 113.66, 112.74, 63.39, 62.98, 55.42, 55.16, 51.77. IR (neat,  $cm^{-1}$ ):  $\nu = 2818$ , 1707, 1605, 1513, 1255, 1167, 1103, 1025, 768. HRMS (ESI)  $m/z$   $[M+Na]^+$ : Calcd for  $C_{34}H_{38}O_{10}Na$ : 653.2363. Found: 653.2370. The enantiomeric ratio was determined by Daicel Chiralpak AD-H, Hexanes/IPA = 70:30, 2.0 mL/min,  $\lambda = 254nm$ ,  $t_R$ (major) = 8.91 min,  $t_R$ (minor) = 18.83 min.

**(2R, 3R)-2,3-bis(4-chlorophenyl)-2,3-bis(hydroxymethyl)butane-1,4-diyl bis(4-methoxybenzoate) (2c)**

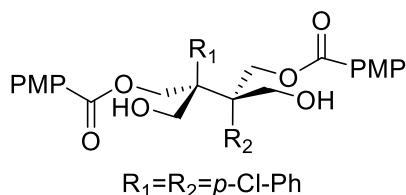

White solid, 93%, 13:1 d.r., >99% *ee*. Analytical data for **2c**:  $[\alpha]_D^{20} = +10.4^\circ$  ( $c = 0.50$ ,  $CH_3OH$ ). mp: 109 °C.  $^1H$  NMR (400 MHz,  $CDCl_3$ )  $\delta$  7.72-7.65 (m, 4H), 7.22 (d,  $J = 8.9$  Hz, 4H), 6.95-6.83 (br, 4H), 6.83-6.77 (m, 4H), 5.36 (d,  $J = 11.7$  Hz, 2H), 5.06 (d,  $J = 11.6$  Hz, 2H), 4.29 (d,  $J = 12.2$  Hz, 2H), 3.84-3.73 (m, 8H).  $^{13}C$  NMR (101 MHz,  $CDCl_3$ )  $\delta$  167.13, 163.74, 136.45, 133.17, 131.73, 130.01, 127.71, 121.55, 113.74, 62.96, 62.50, 55.43, 52.12. IR (neat,  $cm^{-1}$ ):  $\nu = 2919$ , 1712, 1604, 1508, 1253, 1169, 1096, 1028, 846, 793, 765. HRMS (ESI)  $m/z$   $[M+Na]^+$ : Calcd for  $C_{34}H_{32}Cl_2O_8Na$ : 661.1372. Found: 661.1376. The enantiomeric ratio was determined by Daicel Chiralpak IB, Hexanes/IPA = 80:20, 1.5 mL/min,  $\lambda = 254nm$ ,  $t_R$ (major) = 10.05 min,  $t_R$ (minor) = 11.20 min.

**(2R, 3R)-2,3-bis(hydroxymethyl)-2,3-di-p-tolylbutane-1,4-diyl bis(4-methoxybenzoate) (2d)**

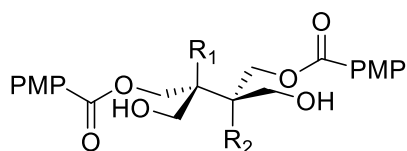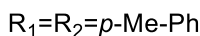

White solid, 88%, 11:1 d.r., >99% *ee*. Analytical data for **2d**:  $[\alpha]_D^{20} = +9.4^\circ$  ( $c = 0.53$ ,  $\text{CH}_3\text{OH}$ ). mp: 105-107 °C.  $^1\text{H}$  NMR (400 MHz,  $\text{CDCl}_3$ )  $\delta$  7.82-7.68 (m, 4H), 7.02 (d,  $J = 8.0$  Hz, 4H), 6.90-6.73 (m, 8H), 5.26 (d,  $J = 11.5$  Hz, 2H), 4.91 (d,  $J = 11.5$  Hz, 2H), 4.43 (d,  $J = 12.3$  Hz, 2H), 3.95 (d,  $J = 12.3$  Hz, 2H), 3.80 (s, 6H), 2.31 (s, 6H).  $^{13}\text{C}$  NMR (101 MHz,  $\text{CDCl}_3$ )  $\delta$  167.13, 163.55, 136.54, 134.85, 131.75, 128.44, 128.19, 122.01, 113.64, 63.62, 62.86, 55.42, 51.81, 20.96. IR (neat,  $\text{cm}^{-1}$ ):  $\nu = 2919$ , 1692, 1604, 1512, 1255, 1166, 1102, 1027, 846, 767. HRMS (ESI)  $m/z$   $[\text{M}+\text{Na}]^+$ : Calcd for  $\text{C}_{36}\text{H}_{38}\text{O}_8\text{Na}$ : 621.2464. Found: 621.2465. The enantiomeric ratio was determined by Daicel Chiralpak IB, Hexanes/IPA = 80:20, 1.5 mL/min,  $\lambda = 254\text{nm}$ ,  $t_R(\text{major}) = 9.13$  min,  $t_R(\text{minor}) = 10.08$  min.

**(2R, 3R)-2,3-bis(hydroxymethyl)-2,3-bis(3-(trifluoromethyl)phenyl)butane-1,4-diyl bis(4-methoxybenzoate) (2e)**

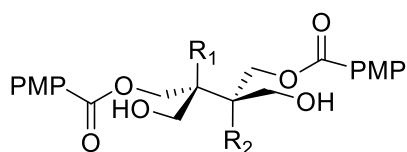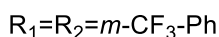

White solid, 89%, 6:1 d.r., >99% *ee*. Analytical data for **2e**:  $[\alpha]_D^{20} = +14.9^\circ$  ( $c = 0.51$ ,  $\text{CH}_3\text{OH}$ ). mp: 202-204 °C.  $^1\text{H}$  NMR (400 MHz,  $\text{CDCl}_3$ )  $\delta$  7.68 (d,  $J = 8.8$  Hz, 4H), 7.54 (d,  $J = 7.6$  Hz, 2H), 7.41 (t,  $J = 7.7$  Hz, 2H), 7.35-7.15 (br, 2H), 7.10-6.90 (br, 2H), 6.79 (d,  $J = 8.8$  Hz, 4H), 5.47 (d,  $J = 11.6$  Hz, 2H), 5.26-5.05 (br, 2H), 4.40-4.20 (br, 2H), 3.86-3.70 (m, 8H).  $^{13}\text{C}$  NMR (101 MHz,  $\text{CDCl}_3$ )  $\delta$  167.14, 163.81, 138.94, 131.75, 130.14, 129.82, 128.18, 125.27, 124.15 (q,  $J_{\text{C-F}} = 16.0$  Hz), 122.56, 121.34, 113.74, 62.70, 62.13, 55.43, 52.72.  $^{19}\text{F}$  NMR (376 MHz,  $\text{CDCl}_3$ )  $\delta$  -62.57. IR (neat,  $\text{cm}^{-1}$ ):  $\nu = 2918$ , 1695, 1609, 1524, 1328, 1260, 1169, 1117, 1015, 763, 710. HRMS (ESI)  $m/z$   $[\text{M}+\text{Na}]^+$ : Calcd for  $\text{C}_{36}\text{H}_{32}\text{F}_6\text{O}_8\text{Na}$ : 729.1899. Found: 729.1901. The enantiomeric ratio was determined by Daicel Chiralpak IB, Hexanes/IPA = 80:20, 1.5 mL/min,  $\lambda = 254\text{nm}$ ,  $t_R(\text{major}) = 7.71$  min,  $t_R(\text{minor}) = 8.55$  min.

**(2R, 3R)-2,3-bis(hydroxymethyl)-2,3-di(naphthalen-2-yl)butane-1,4-diyl bis(4-methoxybenzoate) (2f)**

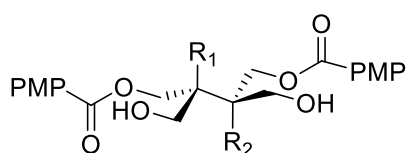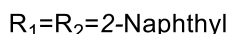

White solid, 96%, 12:1 d.r., >99% *ee*. Analytical data for **2f**:  $[\alpha]_D^{20} = -29.3^\circ$  ( $c = 0.92$ ,  $\text{CH}_3\text{OH}$ ). mp: 92-94 °C.  $^1\text{H}$  NMR (400 MHz,  $\text{CDCl}_3$ )  $\delta$  7.80 (d,  $J = 8.0$  Hz, 2H), 7.70-7.56 (m, 8H), 7.51-7.41 (m, 4H), 7.34-7.28 (br, 2H), 7.09 (d,  $J = 7.9$  Hz, 2H), 6.71 (d,  $J = 8.9$  Hz, 4H), 5.52 (d,  $J = 10.1$  Hz, 2H), 5.30-5.06 (br, 2H), 4.58 (d,  $J = 12.1$  Hz, 2H), 4.12-3.96 (br, 2H), 3.74 (s, 6H).  $^{13}\text{C}$  NMR (101 MHz,  $\text{CDCl}_3$ )  $\delta$  167.18, 163.55, 135.72, 132.56, 132.23, 131.70, 128.28, 127.98, 127.92, 127.24, 126.62, 126.18, 125.94, 121.79, 113.63, 63.30, 63.22, 55.36, 52.56. IR (neat,  $\text{cm}^{-1}$ ):  $\nu = 2920$ , 1690, 1604, 1510, 1255, 1166, 1100, 1024, 845, 766. HRMS (ESI)  $m/z$   $[\text{M}+\text{Na}]^+$ : Calcd for  $\text{C}_{42}\text{H}_{38}\text{O}_8\text{Na}$ : 693.2464. Found: 693.2464. The enantiomeric ratio was determined by Daicel Chiralpak IB, Hexanes/IPA = 80:20, 1.5 mL/min,  $\lambda = 254\text{nm}$ ,  $t_R(\text{major}) = 12.69$  min,  $t_R(\text{minor}) = 15.65$  min.

**(2R, 3R)-2,3-bis(hydroxymethyl)-2,3-dimethylbutane-1,4-diyl bis(4-methoxybenzoate) (2g)**

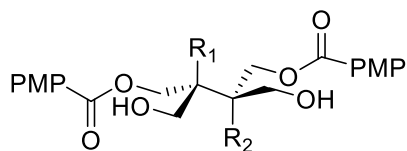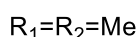

White solid, 84%, 8:1 d.r., >99% *ee*. Analytical data for **2g**:  $[\alpha]_D^{20} = -4.0^\circ$  ( $c = 0.50$ ,  $\text{CH}_3\text{OH}$ ). mp: 141-142 °C.  $^1\text{H}$  NMR (400 MHz,  $\text{CDCl}_3$ )  $\delta$  8.05-7.95 (m, 4H), 6.98-6.87 (m, 4H),

4.66 (d,  $J = 11.3$  Hz, 2H), 4.36 (d,  $J = 11.2$  Hz, 2H), 3.86 (s, 6H), 3.75 (d,  $J = 12.3$  Hz, 2H), 3.57 (d,  $J = 12.3$  Hz, 2H), 1.06 (s, 6H).  $^{13}\text{C}$  NMR (101 MHz,  $\text{CDCl}_3$ )  $\delta$  166.94, 163.64, 131.74, 122.18, 113.78, 66.20, 64.61, 55.48, 43.30, 16.81. IR (neat,  $\text{cm}^{-1}$ ):  $\nu = 2921, 1703, 1675, 1605, 1511, 1460, 1259, 1167, 1101, 1030, 843, 765$ . HRMS (ESI)  $m/z$   $[\text{M}+\text{Na}]^+$ : Calcd for  $\text{C}_{24}\text{H}_{30}\text{O}_8\text{Na}$ : 469.1838. Found: 469.1839. The enantiomeric ratio was determined by Daicel Chiralpak AD-H, Hexanes/IPA = 80:20, 1.5 mL/min,  $\lambda = 254\text{nm}$ ,  $t_R(\text{major}) = 12.87$  min,  $t_R(\text{minor}) = 13.92$  min.

**(2R, 3R)-2,3-diethyl-2,3-bis(hydroxymethyl)butane-1,4-diyl bis(4-methoxybenzoate) (2h)**

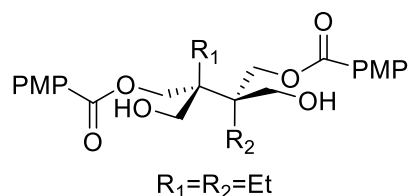

Colorless oil, 61%, 18:1 d.r., >99% *ee*. Analytical data for **2h**:  $[\alpha]_{\text{D}}^{20} = -3.2^\circ$  ( $c = 0.44$ ,  $\text{CH}_3\text{OH}$ ).  $^1\text{H}$  NMR (400 MHz,  $\text{CDCl}_3$ )  $\delta$  8.01-7.90 (m, 4H), 6.98-6.86 (m, 4H), 4.47 (q,  $J = 12.0$  Hz, 4H), 3.89-3.77 (m, 10H), 1.79 (ddd,  $J = 14.6, 7.2, 3.0$  Hz, 4H), 1.02 (t,  $J = 7.5$  Hz, 6H).  $^{13}\text{C}$  NMR (101 MHz,  $\text{CDCl}_3$ )  $\delta$  166.43, 163.54, 131.60, 122.34, 113.79, 65.82, 62.95, 55.48, 46.12, 22.95, 9.14. IR (neat,  $\text{cm}^{-1}$ ):  $\nu = 2920, 1706, 1604, 1511, 1462, 1251, 1166, 1100, 1024, 846, 768$ . HRMS (ESI)  $m/z$   $[\text{M}+\text{Na}]^+$ : Calcd for  $\text{C}_{26}\text{H}_{34}\text{O}_8\text{Na}$ : 497.2151. Found: 497.2151. The enantiomeric ratio was determined by Daicel Chiralpak AD-H, Hexanes/IPA = 90:10, 1.5 mL/min,  $\lambda = 254\text{nm}$ ,  $t_R(\text{major}) = 20.49$  min,  $t_R(\text{minor}) = 22.66$  min.

**(2R, 3R)-2-benzyl-2,3-bis(hydroxymethyl)-3-methylbutane-1,4-diyl bis(4-methoxybenzoate) (2i)**

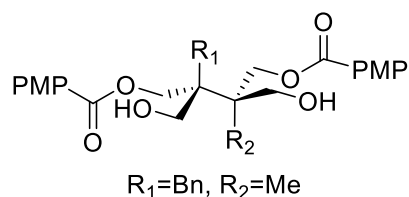

Colorless oil, 94%, 5:1 d.r., 92% *ee*. Analytical data for **2i**:  $[\alpha]_{\text{D}}^{20} = +39.6^\circ$  ( $c = 0.46$ ,  $\text{CH}_3\text{OH}$ ).  $^1\text{H}$  NMR (400 MHz,  $\text{CDCl}_3$ )  $\delta$  8.04-7.98 (m, 2H), 7.90-7.83 (m, 2H), 7.25-7.12 (m, 5H), 6.95-6.87 (m, 4H), 4.79 (d,  $J = 11.3$  Hz, 1H), 4.53 (d,  $J = 11.3$  Hz, 1H), 4.32 (dd,  $J = 29.0, 12.2$  Hz, 2H), 3.88-3.75 (m, 9H), 3.69 (d,  $J = 12.1$  Hz, 1H), 3.06 (s, 2H), 1.22 (s, 3H).  $^{13}\text{C}$  NMR (101 MHz,  $\text{CDCl}_3$ )  $\delta$  166.77, 166.08, 163.65, 163.56, 137.25, 131.71, 131.62, 130.77, 128.35, 126.55, 122.21, 122.19, 113.82, 113.77, 67.17, 66.19, 65.49, 63.11, 55.48, 55.48, 46.14, 44.35, 36.08, 17.46. IR (neat,  $\text{cm}^{-1}$ ):  $\nu = 2919, 1709, 1604, 1551, 1255, 1165, 1099, 1026, 845, 767$ . HRMS (ESI)  $m/z$   $[\text{M}+\text{Na}]^+$ : Calcd for  $\text{C}_{30}\text{H}_{34}\text{O}_8\text{Na}$ : 545.2151. Found: 545.2155. The enantiomeric ratio was determined by Daicel Chiralpak AD-H, Hexanes/IPA = 90:10, 1.5 mL/min,  $\lambda = 254\text{nm}$ ,  $t_R(\text{major}) = 48.88$  min,  $t_R(\text{minor}) = 44.34$  min.

**(2R, 3R)-2,3-bis(hydroxymethyl)-2-methylbutane-1,4-diyl bis(4-methoxybenzoate) (2l)**

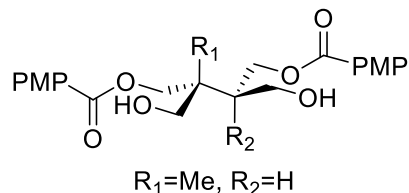

Colorless oil, 85%, 5:1 d.r., 98% *ee*. Analytical data for **2l**:  $[\alpha]_{\text{D}}^{20} = +7.0^\circ$  ( $c = 0.77$ ,  $\text{CH}_3\text{OH}$ ).  $^1\text{H}$  NMR (400 MHz,  $\text{CDCl}_3$ )  $\delta$  7.96-7.84 (m, 4H), 6.83 (t,  $J = 8.5$  Hz, 4H), 4.60-4.45 (m, 2H), 4.27 (dd,  $J = 30.0, 11.3$  Hz, 2H), 3.90-3.72 (m, 8H), 3.54 (dd,  $J = 36.6, 11.8$  Hz, 2H), 2.07-1.96 (m, 1H), 1.08 (s, 3H).  $^{13}\text{C}$  NMR (101 MHz,  $\text{CDCl}_3$ )  $\delta$  166.92, 166.62, 163.62, 131.73, 131.71, 122.11, 113.78, 113.74, 67.84, 65.67, 62.30, 59.58, 55.47, 55.46, 44.85, 41.23, 41.10, 18.82. IR (neat,  $\text{cm}^{-1}$ ):  $\nu = 2919, 1678, 1604, 1510, 1419, 1257, 1167, 1101, 1028, 843, 769$ . HRMS (ESI)  $m/z$   $[\text{M}+\text{Na}]^+$ : Calcd for  $\text{C}_{23}\text{H}_{28}\text{O}_8\text{Na}$ : 455.1682. Found: 455.1685. The *ee* of **2l** was determined by transforming **2l** to **8**. And analytical data for **8** was given below.

**(2R, 3R)-2,3-bis(hydroxymethyl)-2-isopropylbutane-1,4-diyl bis(4-methoxybenzoate) (2m)**



$R_1=i\text{Pr}$ ,  $R_2=\text{H}$

Colorless oil, 76%, 8:1 d.r., >99% *ee*. Analytical data for **2m**:  $[\alpha]_{\text{D}}^{20} = +8.1^\circ$  ( $c = 0.67$ ,  $\text{CH}_3\text{OH}$ ).  $^1\text{H}$  NMR (400 MHz,  $\text{CDCl}_3$ )  $\delta$  7.95 (t,  $J = 8.9$  Hz, 4H), 6.90 (dd,  $J = 12.3, 8.9$  Hz, 4H), 4.90-4.77 (m, 1H), 4.49 (dd,  $J = 11.2, 3.9$  Hz, 1H), 4.29 (dd,  $J = 57.0, 12.1$  Hz, 2H), 3.96-3.80 (m, 8H), 3.60 (dd,  $J = 43.7, 12.3$  Hz, 2H), 2.46-2.38 (m, 1H), 2.35 (dt,  $J = 13.8, 7.0$  Hz, 1H), 1.09 (d,  $J = 6.8$  Hz, 3H), 1.00 (d,  $J = 7.0$  Hz, 3H).  $^{13}\text{C}$  NMR (101 MHz,  $\text{CDCl}_3$ )  $\delta$  167.15, 166.17, 163.59, 163.52, 131.76, 131.61, 122.28, 122.06, 113.78, 113.66, 64.48, 62.42, 61.41, 58.42, 55.46, 44.90, 42.39, 28.49, 17.49, 17.39. IR (neat,  $\text{cm}^{-1}$ ):  $\nu = 2919, 1706, 1604, 1511, 1251, 1165, 1099, 1024, 845, 768$ . HRMS (ESI)  $m/z$   $[\text{M}+\text{Na}]^+$ : Calcd for  $\text{C}_{25}\text{H}_{32}\text{O}_8\text{Na}$ : 483.1995. Found: 483.2019. The enantiomeric ratio was determined by Daicel Chiralpak AD-H, Hexanes/IPA = 90:10, 1.0 mL/min,  $\lambda = 254\text{nm}$ ,  $t_{\text{R}}(\text{major}) = 34.28$  min,  $t_{\text{R}}(\text{minor}) = 32.37$  min.

**(2R, 3R)-2-benzyl-2,3-bis(hydroxymethyl)butane-1,4-diyl bis(4-methoxybenzoate) (2n)**

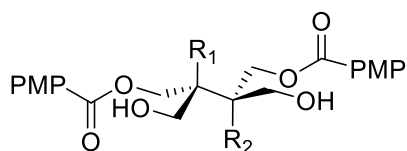

$R_1=\text{Bn}$ ,  $R_2=\text{H}$

Colorless oil, 75%, 5:1 d.r., >99% *ee*. Analytical data for **2n**:  $[\alpha]_{\text{D}}^{20} = +17.3^\circ$  ( $c = 0.45$ ,  $\text{CH}_3\text{OH}$ ).  $^1\text{H}$  NMR (400 MHz,  $\text{CDCl}_3$ )  $\delta$  8.05-7.97 (m, 4H), 7.32-7.19 (m, 5H), 7.00-6.88 (m, 4H), 4.74 (d,  $J = 6.7$  Hz, 2H), 4.54 (d,  $J = 11.6$  Hz, 1H), 4.18 (d,  $J = 11.7$  Hz, 1H), 3.88 (s, 3H), 3.87 (s, 3H), 3.84-3.72 (m, 2H), 3.57 (dd,  $J = 27.7, 12.3$  Hz, 2H), 2.88 (dd,  $J = 48.3, 13.7$  Hz, 2H), 2.18-2.10 (m, 1H).  $^{13}\text{C}$  NMR (101 MHz,  $\text{CDCl}_3$ )  $\delta$  166.86, 166.62, 163.77, 163.63, 136.25, 131.79, 130.67, 128.49, 126.81, 122.18, 121.99, 113.90, 113.74, 64.36, 62.76, 61.29, 58.26, 55.52, 55.48, 44.82, 42.77, 37.58. IR (neat,  $\text{cm}^{-1}$ ):  $\nu = 2919, 1706, 1604, 1511, 1252, 1165, 1099, 1024, 845, 767$ . HRMS (ESI)  $m/z$   $[\text{M}+\text{Na}]^+$ : Calcd for  $\text{C}_{29}\text{H}_{32}\text{O}_8\text{Na}$ : 531.1995. Found: 531.2006. The enantiomeric ratio was determined by Daicel Chiralpak AD-H, Hexanes/IPA = 80:20, 1.5 mL/min,  $\lambda = 254\text{nm}$ ,  $t_{\text{R}}(\text{major}) = 15.32$  min,  $t_{\text{R}}(\text{minor}) = 20.97$  min.

**(2S, 3R)-2,3-bis(hydroxymethyl)-2-phenylbutane-1,4-diyl bis(4-methoxybenzoate) (2o)**



$R_1=\text{Ph}$ ,  $R_2=\text{H}$

Colorless oil, 88%, 8:1 d.r., >99% *ee*. Analytical data for **2o**:  $[\alpha]_{\text{D}}^{20} = -22.3^\circ$  ( $c = 0.53$ ,  $\text{CH}_3\text{OH}$ ).  $^1\text{H}$  NMR (400 MHz,  $\text{CDCl}_3$ )  $\delta$  7.93-7.86 (m, 2H), 7.79-7.72 (m, 2H), 7.45-7.33 (m, 4H), 7.26-7.22 (m, 1H), 6.92-6.77 (m, 4H), 5.03 (d,  $J = 11.4$  Hz, 1H), 4.79 (d,  $J = 11.4$  Hz, 1H), 4.57 (dd,  $J = 11.3, 8.6$  Hz, 1H), 4.29-4.22 (m, 2H), 4.11 (d,  $J = 12.1$  Hz, 1H), 3.86-3.78 (m, 8H), 2.52-2.42 (m, 1H).  $^{13}\text{C}$  NMR (101 MHz,  $\text{CDCl}_3$ )  $\delta$  166.95, 166.61, 163.63, 163.55, 141.14, 131.77, 131.65, 128.78, 127.00, 126.49, 122.02, 121.99, 113.67, 65.89, 62.98, 62.03, 59.07, 55.45, 55.41, 48.20, 46.86. IR (neat,  $\text{cm}^{-1}$ ):  $\nu = 2918, 1706, 1604, 1511, 1254, 1165, 1098, 1021, 845, 765, 695$ . HRMS (ESI)  $m/z$   $[\text{M}+\text{Na}]^+$ : Calcd for  $\text{C}_{28}\text{H}_{30}\text{O}_8\text{Na}$ : 517.1838. Found: 517.1839. The enantiomeric ratio was determined by Daicel Chiralpak IB, Hexanes/IPA = 80:20, 0.2 mL/min,  $\lambda = 254\text{nm}$ ,  $t_{\text{R}}(\text{major}) = 84.59$  min,  $t_{\text{R}}(\text{minor}) = 88.63$  min.

## General Procedure for Oxidative Desymmetrization of **1j**, **1k**, **1p**<sup>5</sup>

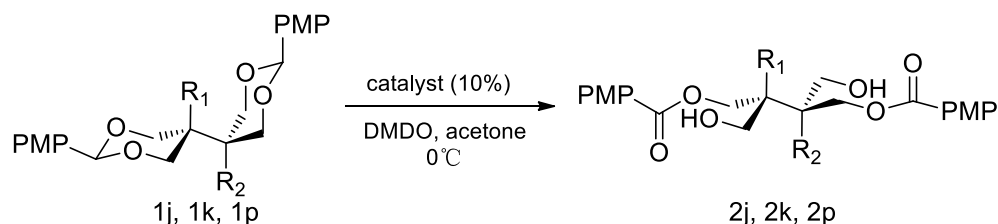

To a flame-dried Schlenk tube were added substrate **1j**, **1k** or **1p** (0.025 mmol) and catalyst 10 mol%. The tube was put into ice-water bath. To the mixture was added 2 mL fresh-made DMDO\* (~0.1 mmol/mL). The mixture was stirred at 0 °C until the starting material disappeared (monitored by TLC). The solvent was removed under reduced pressure, and the residue was purified by silica gel column chromatography (DCM: CH<sub>3</sub>OH = 20:1) to afford product **2j**, **2k**, **2p**.

(\*DMDO was used immediately after preparation, and the concentration of DMDO was determined to be ~0.1 mmol/mL. The concentration dropped from ~0.1 mmol/mL to ~0.07 mmol/mL after storage for one week at -20 °C.)

### (2*S*, 3*R*)-2-benzyl-2,3-bis(hydroxymethyl)-3-methylbutane-1,4-diyl bis(4-methoxybenzoate) (**2j**)

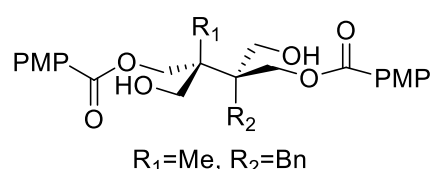

Colorless oil, 89%, 5:1 d.r., 98% *ee*. Analytical data for **2j**:  $[\alpha]_{\text{D}}^{20} = -32.9^\circ$  ( $c = 0.79$ , CH<sub>3</sub>OH). <sup>1</sup>H NMR (400 MHz, CDCl<sub>3</sub>)  $\delta$  8.01-7.97 (m, 2H), 7.88-7.82 (m, 2H), 7.35-7.30 (m, 2H), 7.29-7.23 (m, 4H), 7.21-7.15 (m, 1H), 6.94-6.87 (m, 4H), 4.95 (d,  $J = 11.2$  Hz, 1H), 4.53 (d,  $J = 11.3$  Hz, 1H),

4.37 (d,  $J = 12.2$  Hz, 1H), 4.14 (d,  $J = 12.2$  Hz, 1H), 3.90-3.80 (m, 8H), 3.59 (dd,  $J = 12.4, 9.3$  Hz, 2H), 3.21 (d,  $J = 13.2$  Hz, 1H), 2.80 (d,  $J = 13.2$  Hz, 1H), 1.19 (s, 3H). <sup>13</sup>C NMR (101 MHz, CDCl<sub>3</sub>)  $\delta$  167.28, 166.00, 163.74, 163.55, 136.81, 131.84, 131.60, 130.89, 128.33, 126.56, 122.11, 121.98, 113.80, 67.12, 66.59, 64.25, 61.69, 55.50, 55.47, 46.11, 44.73, 35.06, 17.13. IR (neat, cm<sup>-1</sup>):  $\nu = 2356, 1710, 1605, 1258, 1102, 1056, 766$ . HRMS (ESI)  $m/z$   $[\text{M}+\text{Na}]^+$ : Calcd for C<sub>30</sub>H<sub>34</sub>O<sub>8</sub>Na: 545.2151. Found: 545.2158. The enantiomeric ratio was determined by Daicel Chiralpak AD-H, Hexanes/IPA = 90:10, 1.5 mL/min,  $\lambda = 254\text{nm}$ ,  $t_{\text{R}}(\text{major}) = 38.60$  min,  $t_{\text{R}}(\text{minor}) = 56.35$  min.

### (2*R*, 3*S*)-2,3-bis(hydroxymethyl)-2-methyl-3-phenylbutane-1,4-diyl bis(4-methoxybenzoate) (**2k**)

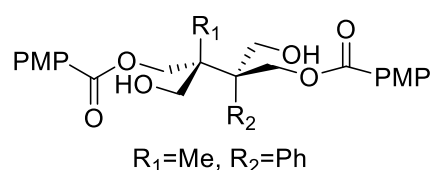

Colorless oil, 87%, 4:1 d.r., >99% *ee*. Analytical data for **2k**:  $[\alpha]_{\text{D}}^{20} = -26.5^\circ$  ( $c = 0.76$ , CH<sub>3</sub>OH). <sup>1</sup>H NMR (400 MHz, CDCl<sub>3</sub>)  $\delta$  8.04-7.92 (m, 2H), 7.87-7.72 (m, 2H), 7.42-7.31 (m, 4H), 7.29-7.23 (m, 1H), 7.00-6.90 (m, 2H), 6.87-6.80 (m, 2H), 5.32 (d,  $J = 11.8$  Hz, 1H), 5.16 (d,  $J = 11.8$  Hz, 1H),

4.53 (d,  $J = 12.2$  Hz, 1H), 4.29 (d,  $J = 11.6$  Hz, 1H), 4.14 (d,  $J = 11.6$  Hz, 1H), 4.02 (d,  $J = 12.2$  Hz, 1H), 3.87 (s, 3H), 3.85-3.78 (m, 4H), 3.63 (d,  $J = 12.2$  Hz, 1H), 1.06 (s, 3H). <sup>13</sup>C NMR (101 MHz, CDCl<sub>3</sub>)  $\delta$  167.11, 166.42, 163.66, 163.63, 138.70, 131.75, 131.71, 128.14, 127.95, 127.04, 122.07, 121.88, 113.86, 113.70, 67.99, 65.05, 63.30, 62.73, 55.50, 55.44, 51.62, 44.67, 17.12. IR (neat, cm<sup>-1</sup>):  $\nu = 2919, 1704, 1604, 1511, 1253, 1165, 1099, 1023, 845, 767$ . HRMS (ESI)  $m/z$   $[\text{M}+\text{Na}]^+$ : Calcd for C<sub>29</sub>H<sub>32</sub>O<sub>8</sub>Na: 531.1995. Found: 531.2102. The enantiomeric ratio was determined by Daicel Chiralpak IB, Hexanes/IPA = 80:20, 0.3 mL/min,  $\lambda = 254\text{nm}$ ,  $t_{\text{R}}(\text{major}) = 42.39$  min,  $t_{\text{R}}(\text{minor}) = 44.72$  min.

**(2R, 3R)-2,3-bis(hydroxymethyl)-2-phenylbutane-1,4-diyl bis(4-methoxybenzoate) (2p)**

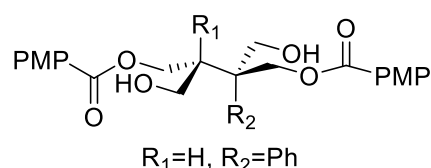

Colorless oil, 91%, 8:1 d.r., >99% *ee*. Analytical data for **2p**:  $[\alpha]_D^{20} = -1.0^\circ$  ( $c = 0.58$ ,  $CH_3OH$ ).  $^1H$  NMR (400 MHz,  $CDCl_3$ )  $\delta$  7.95-7.91 (m, 2H), 7.88-7.82 (m, 2H), 7.50-7.44 (m, 2H), 7.41-7.34 (m, 2H), 7.29-7.22 (m, 1H), 6.92-6.83 (m, 4H), 4.92 (d,  $J = 11.7$  Hz, 1H), 4.82 (d,  $J = 11.7$  Hz, 1H),

4.42 (qd,  $J = 11.5, 5.8$  Hz, 2H), 4.22 (d,  $J = 12.0$  Hz, 1H), 4.01 (d,  $J = 12.1$  Hz, 1H), 3.92 (dd,  $J = 11.9, 5.8$  Hz, 1H), 3.85 (s, 3H), 3.83 (s, 3H), 3.77 (dd,  $J = 12.0, 4.0$  Hz, 1H), 2.68-2.61 (m, 1H).  $^{13}C$  NMR (101 MHz,  $CDCl_3$ )  $\delta$  166.71, 166.57, 163.62, 140.95, 131.74, 131.72, 128.83, 127.07, 126.88, 122.00, 121.94, 113.75, 113.72, 65.49, 64.92, 62.90, 60.09, 55.47, 55.46, 49.08, 47.33. IR (neat,  $cm^{-1}$ ):  $\nu = 2919, 1705, 1604, 1511, 1468, 1256, 1165, 1098, 1019, 845, 798$ . HRMS (ESI)  $m/z$   $[M+Na]^+$ : Calcd for  $C_{28}H_{30}O_8Na$ : 517.1838. Found: 517.1839. The enantiomeric ratio was determined by Daicel Chiralpak IB, Hexanes/IPA = 80:20, 0.2 mL/min,  $\lambda = 254nm$ ,  $t_R$ (major) = 73.80 min,  $t_R$ (minor) = 79.59 min.

**General Procedure for the synthesis of 3, 8, 9<sup>6</sup>**

To a dry 25 mL round-bottom flask were added 1.12 g TsCl (5.8 mmol, 2.2 equiv), 32 mg DMAP (0.27 mmol, 0.10 equiv), 0.74 mL  $Et_3N$  (5.4 mmol, 2.0 equiv), and 6 mL DCM. The resulting mixture was cooled to  $0^\circ C$ , and a solution of **2** in 6 mL DCM was added dropwise. The mixture was allowed to warm to room temperature and stirred overnight. The solution was then washed with sat. aq.  $NaHCO_3$  (1 $\times$ 12 mL) and  $H_2O$  (1 $\times$ 12 mL). The combined aqueous layers were extracted with DCM (12 mL) and the combined organic layers were dried over  $Na_2SO_4$ , and concentrated in vacuo. The residue was purified by flash column chromatography (ethyl acetate / petroleum ether) to afford product **3, 8, 9** in 90%-95% yield.

**((3R, 4R)-3,4-dimethyltetrahydrofuran-3,4-diyl)bis(methylene) bis(4-methoxybenzoate) (3)**

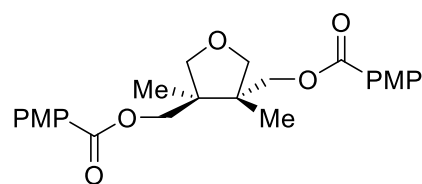

White solid, Analytical data for **3**:  $[\alpha]_D^{20} = -7.1^\circ$  ( $c = 0.79$ ,  $CHCl_3$ ). mp: 107-108  $^\circ C$ .  $^1H$  NMR (400 MHz,  $CDCl_3$ )  $\delta$  8.01 (dd,  $J = 8.4, 5.9$  Hz, 4H), 7.06-6.85 (m, 4H), 4.46-4.27 (m, 4H), 4.09 (t,  $J = 9.0$  Hz, 2H), 3.90 (s, 3H), 3.89 (s, 3H), 3.81 (dd,  $J = 8.6, 6.0$  Hz, 2H), 1.28 (s, 6H).  $^{13}C$  NMR (101 MHz,  $CDCl_3$ )  $\delta$  166.25, 163.55, 131.60, 122.29, 113.79, 77.12, 68.01, 55.47, 46.57, 17.24. IR (neat,  $cm^{-1}$ ):  $\nu = 2357, 1726, 1604, 1455, 1276, 1164, 1052, 750, 714$ . HRMS (ESI)  $m/z$   $[M+Na]^+$ : Calcd for  $C_{24}H_{28}O_7Na$ : 451.1733. Found: 451.1735.

**((3R, 4R)-3-methyltetrahydrofuran-3,4-diyl)bis(methylene) bis(4-methoxybenzoate) (8)**

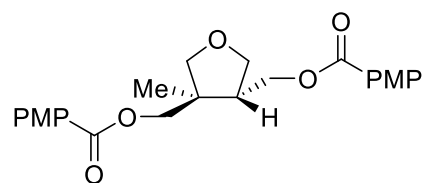

Colorless oil, Analytical data for **8**:  $[\alpha]_D^{20} = -8.4^\circ$  ( $c = 0.38$ ,  $CHCl_3$ ).  $^1H$  NMR (400 MHz,  $CDCl_3$ )  $\delta$  8.09-7.91 (m, 4H), 7.04-6.88 (m, 4H), 4.56 (dd,  $J = 11.3, 6.7$  Hz, 1H), 4.48-4.30 (m, 3H), 4.29-4.20 (m, 1H), 4.01 (d,  $J = 8.7$  Hz, 1H), 3.89 (s, 6H), 3.66 (d,  $J = 8.8$  Hz, 1H), 2.62 (dq,  $J = 15.7, 7.8$  Hz, 1H),

1.34 (s, 3H).  $^{13}C$  NMR (101 MHz,  $CDCl_3$ )  $\delta$  166.19, 163.52, 131.63, 122.27, 113.74, 77.23, 71.04, 66.70, 62.82, 55.46, 47.66, 44.60, 21.80. IR (neat,  $cm^{-1}$ ):  $\nu = 2917, 1698, 1605, 1511, 1464, 1258$ ,

1167, 1094, 1024, 847, 799, 769. HRMS (ESI)  $m/z$   $[M+Na]^+$ : Calcd for  $C_{23}H_{26}O_7Na$ : 437.1576 Found: 437.1574. The enantiomeric ratio was determined by Daicel Chiralpak AD-H, Hexanes/IPA = 90:10, 0.6 mL/min,  $\lambda$  = 254nm,  $t_R$ (major) = 58.34 min,  $t_R$ (minor) = 52.72 min.

**((3*R*, 4*R*)-3,4-bis(4-chlorophenyl)tetrahydrofuran-3,4-diyl)bis(methylene) bis(4-methoxybenzoate) (9)**

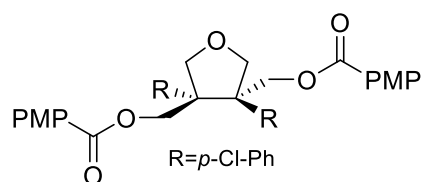

White solid, Analytical data for **9**:  $[\alpha]_D^{20}$  = -44.5° ( $c$  = 0.40,  $CHCl_3$ ). mp: 191-192 °C.  $^1H$  NMR (400 MHz,  $CDCl_3$ )  $\delta$  7.61 (d,  $J$  = 8.8 Hz, 4H), 7.40 (dd,  $J$  = 25.5, 8.6 Hz, 8H), 6.80 (d,  $J$  = 8.8 Hz, 4H), 4.60 (dd,  $J$  = 10.4, 6.5 Hz, 4H), 4.32 (d,  $J$  = 9.5 Hz, 2H), 3.87 (d,  $J$  = 11.6 Hz, 2H), 3.80 (s, 6H).  $^{13}C$  NMR (101 MHz,  $CDCl_3$ )  $\delta$  165.69, 163.54, 136.90, 133.60, 131.42, 129.02, 128.79, 121.68, 113.69, 77.16, 67.11, 55.43, 54.66. HRMS (ESI)  $m/z$   $[M+Na]^+$ : Calcd for  $C_{34}H_{30}Cl_2O_7Na$ : 643.1266. Found: 643.1236.

**Procedure for the synthesis of 4<sup>7</sup>**

To a 10 mL round-bottom flask were added **2g** (0.1 mmol, 1.0 equiv) and 1 mL acetone. The resulting mixture was cooled to 0 °C, and 2 mL Jones reagent was added dropwise. The mixture was allowed to stir at 0 °C for 30 min. The reaction mixture was then diluted with EtOAc ( $3 \times 10$  mL) and washed with brine, the combined organic layers were dried over  $Na_2SO_4$ , and concentrated in vacuo. The residue was purified by flash column chromatography (ethyl acetate / petroleum ether) to afford product **4** in 81% yield.

**((3*S*, 4*S*)-3,4-dimethyl-2-oxotetrahydrofuran-3,4-diyl)bis(methylene) bis(4-methoxybenzoate) (4)**

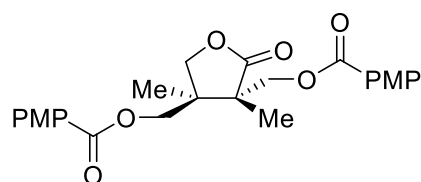

Colorless oil, Analytical data for **4**:  $[\alpha]_D^{20}$  = 5.5° ( $c$  = 0.58,  $CHCl_3$ ).  $^1H$  NMR (400 MHz,  $CDCl_3$ )  $\delta$  8.02-7.90 (m, 4H), 6.98-6.87 (m, 4H), 4.49 (d,  $J$  = 11.4 Hz, 1H), 4.37 (d,  $J$  = 9.1 Hz, 1H), 4.32 (dd,  $J$  = 11.4, 5.0 Hz, 2H), 4.24 (dd,  $J$  = 12.9, 10.5 Hz, 2H), 3.86 (d,  $J$  = 1.9 Hz, 6H), 1.32 (s, 3H), 1.21 (s, 3H).  $^{13}C$  NMR (101 MHz,  $CDCl_3$ )  $\delta$  178.70, 165.94, 165.51, 163.82, 131.82, 131.75, 121.57, 121.48, 113.94, 74.68, 68.82, 66.80, 55.50, 55.48, 47.01, 43.81, 15.79, 14.21. IR (neat,  $cm^{-1}$ ):  $\nu$  = 2919, 1709, 1604, 1511, 1468, 1255, 1165, 1085, 1019, 845, 766. HRMS (ESI)  $m/z$   $[M+Na]^+$ : Calcd for  $C_{24}H_{26}O_8Na$ : 465.1525. Found: 465.1525.

**Procedure for the synthesis of 10<sup>8</sup>**

To a dry 10 mL round-bottom flask were added MsCl (0.3 mmol), DMAP (0.01 mmol),  $Et_3N$  (0.3 mmol), and 1 mL dry DCM. The resulting mixture was cooled to 0 °C, and a solution of **2g** (0.1 mmol) in 1 mL dry DCM was added dropwise. The mixture was allowed to warm to room temperature and was allowed to stir overnight. The solution was then washed with sat. aq.  $NaHCO_3$  and  $H_2O$ . The combined aqueous layers were extracted with DCM and the combined organic layers were dried over  $Na_2SO_4$ , and concentrated in vacuo. The residue was purified by flash column chromatography (ethyl acetate / petroleum ether) to afford product **10** in 99% yield.

**(2*S*, 3*S*)-2,3-dimethyl-2,3-bis(((methylsulfonyl)oxy)methyl)butane-1,4-diyl bis(4-methoxybenzoate) (10)**



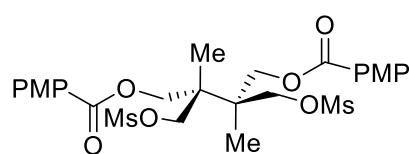

Colorless oil, Analytical data for **10**:  $[\alpha]_D^{20} = +2.4^\circ$  ( $c = 0.50$ ,  $\text{CHCl}_3$ ).  $^1\text{H}$  NMR (300 MHz,  $\text{CDCl}_3$ )  $\delta$  8.07-7.92 (m, 4H), 6.99-6.87 (m, 4H), 4.53-4.32 (m, 8H), 3.86 (s, 6H), 3.00 (s, 6H), 1.20 (s, 6H).  $^{13}\text{C}$  NMR (101 MHz,  $\text{CDCl}_3$ )  $\delta$  165.80, 163.76, 131.70, 121.71, 113.95, 70.19, 65.35, 55.50, 42.21, 37.40, 16.51. HRMS (ESI)  $m/z$   $[\text{M}+\text{Na}]^+$ : Calcd for  $\text{C}_{26}\text{H}_{34}\text{O}_{12}\text{S}_2\text{Na}$ : 625.1389. Found: 625.1421.

#### Procedure for the synthesis of **5**<sup>8</sup>

To a 10 mL round-bottom flask were added **10** (0.1 mmol),  $\text{NaN}_3$  (0.3 mmol),  $\text{Bu}_4\text{NI}$  (0.02 mmol), and 1 mL of DMF. The mixture was allowed to stir at  $120^\circ\text{C}$  for 2d. The reaction mixture was diluted with ethyl acetate and  $\text{H}_2\text{O}$ . Then the organic layer was washed with brine, dried over  $\text{MgSO}_4$ , and concentrated in vacuo. The residue was purified by silica gel column chromatography (ethyl acetate / petroleum ether) to give the product **5** in 62% yield.

#### (2R, 3R)-2,3-bis(azidomethyl)-2,3-dimethylbutane-1,4-diyl bis(4-methoxybenzoate) (**5**)

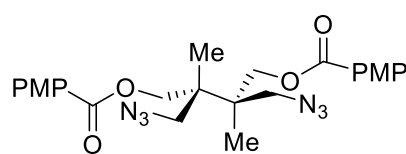

Colorless oil. Analytical data for **5**:  $[\alpha]_D^{20} = 18.7^\circ$  ( $c = 0.50$ ,  $\text{CHCl}_3$ ).  $^1\text{H}$  NMR (400 MHz,  $\text{CDCl}_3$ )  $\delta$  8.03-7.91 (m, 4H), 6.98-6.87 (m, 4H), 4.42-4.32 (m, 4H), 3.87 (s, 6H), 3.65 (dd,  $J = 48.3, 12.4$  Hz, 4H), 1.13 (s, 6H).  $^{13}\text{C}$  NMR (101 MHz,  $\text{CDCl}_3$ )  $\delta$  165.90, 163.62, 131.59, 122.10, 113.86, 66.52, 55.49, 42.55, 29.71, 17.65. IR (neat,  $\text{cm}^{-1}$ ):  $\nu = 2923, 2099, 1710, 1605, 1511, 1462, 1253, 1165, 1095, 1027, 846, 768$ . HRMS (ESI)  $m/z$   $[\text{M}+\text{Na}]^+$ : Calcd for  $\text{C}_{24}\text{H}_{28}\text{N}_6\text{O}_6\text{Na}$ : 519.1968. Found: 519.1968.

#### Determination of the Absolute Stereochemistry

The absolute configurations of products were determined by transforming **2c** to **9** and the absolute configuration of **9** was determined by X-Ray Crystallographic Analysis. The stereochemistry of the other products was assigned by analogy.

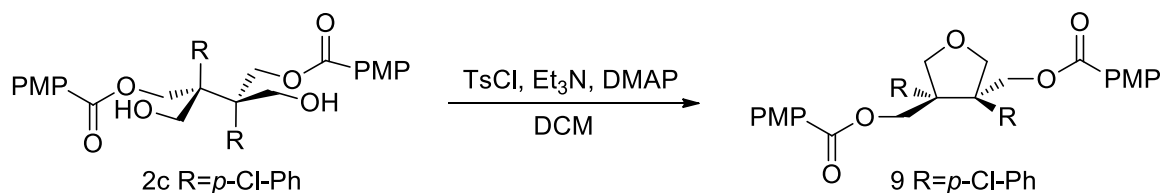

X-Ray Crystallographic Analysis of **9** (CCDC number: 1052043)

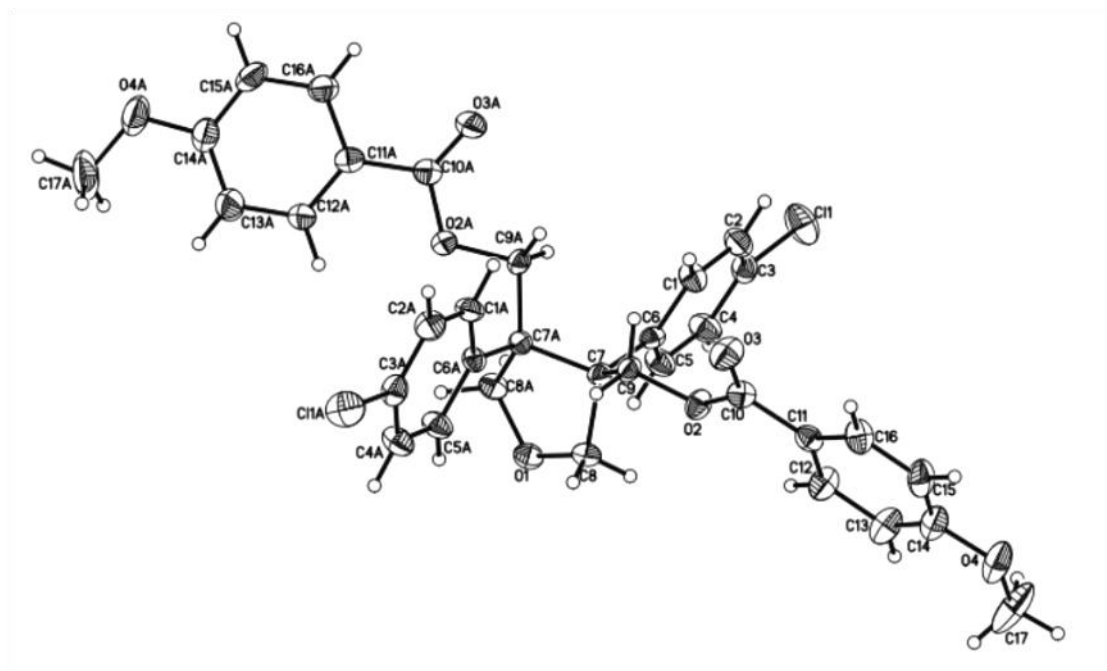

Figure 1. X-ray structure of **9**

#### Determination of the relative configuration of acetals<sup>9</sup>

The relative configurations of acetals were determined by X-Ray Crystallographic Analysis of **1a**, **1h**, **1j**. The relative configurations of other acetals were assigned by analogy.

X-Ray Crystallographic Analysis of **1a** (CCDC number: 1052042)

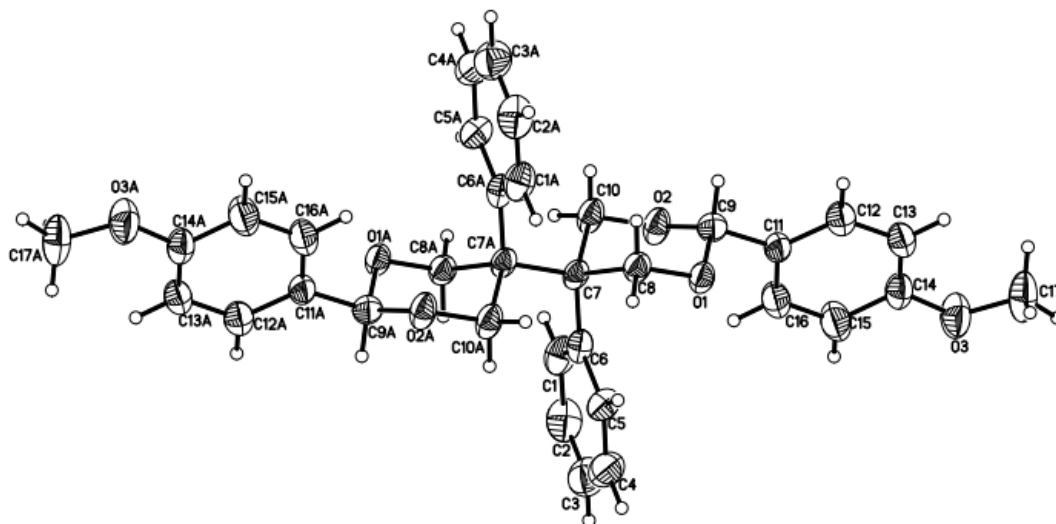

Figure 2. X-ray structure of **1a**

X-Ray Crystallographic Analysis of **1h** (CCDC number: 1052039)

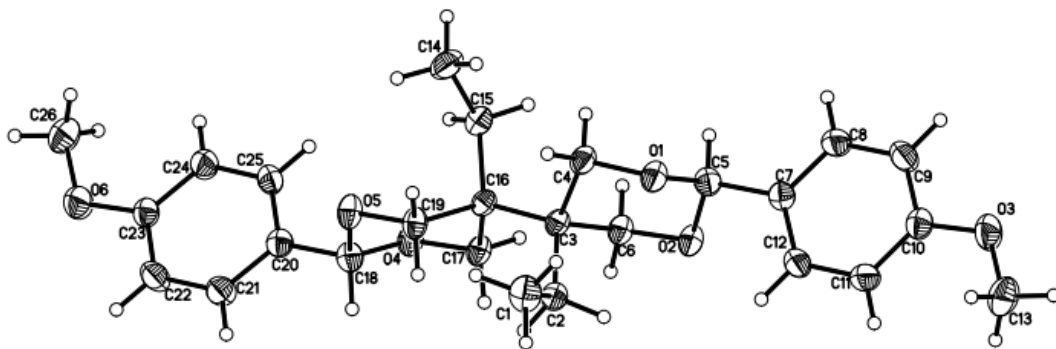

Figure 3. X-ray structure of **1h**

X-Ray Crystallographic Analysis of **1j** (CCDC number: 1052038)

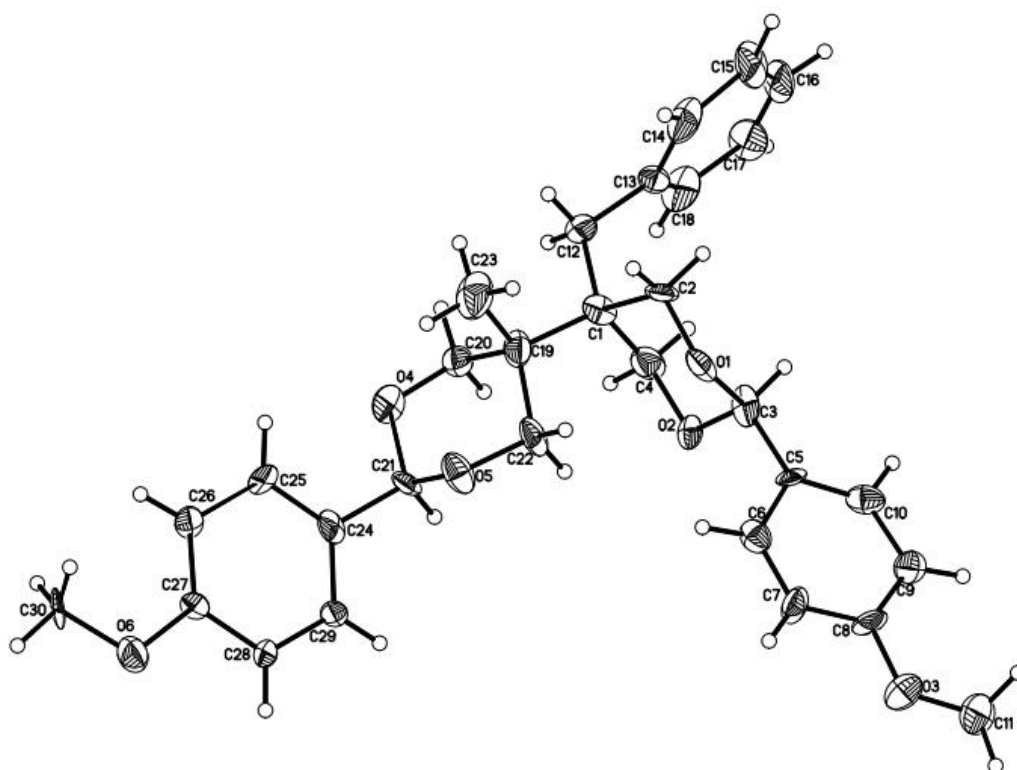

Figure 4. X-ray structure of **1j**

### Suggested transition state

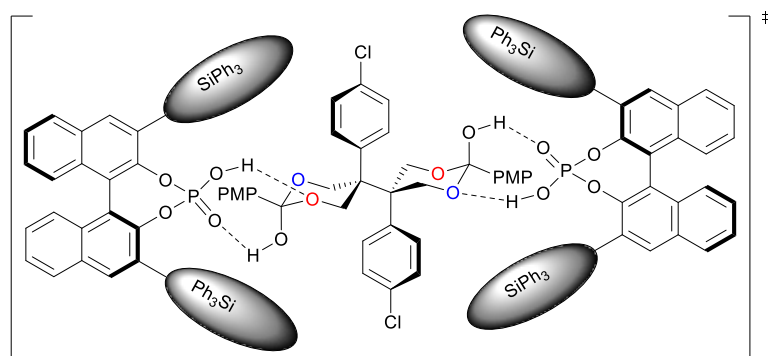

On the basis of the experimental results and our previous DFT calculations about desymmetrization of 1,3-diols via oxidative cleavage of benzylidene acetals. We proposed a reaction pathway, diacetal **1c** was oxidized to form an “ortho ester” intermediate, which underwent an intramolecular [1,3]-proton shift process which can be facilitated in the presence of triphenylsilyl substituted BINOL phosphoric acid **A8**, stereoselectivity was controlled through two hydrogen bonds formed by each phosphoric acid and the “ortho ester” intermediate. Thus given the product **2c** as (R, R) configuration.

### References

- (1) M. Periasamy, G. Ramani, G. P. Muthukumaragopal, *Synthesis*, **2009**, 10, 1739.
- (2) a) B. R. D'Souza, J. Louie, *Organic Letters*, **2009**, 11, 4168; b) F. Björklund, J. Boutelje, S. Gatenbeck, K. Hult, T. Norin, P. Szmulik, *Tetrahedron*, **1985**, 41, 1347; c) T. Ibuka, T. Aoyagi, K. Kitada, F. Yoneda, Y. Yamamoto, *Journal of Organometallic Chemistry*, **1985**, 287, 18; d) C.-Y. Hsing, L.-T. Li, *Journal of the American Chemical Society*, **1949**, 71, 774.
- (3) N. G. Luk'yanenko, O. T. Mel'nik, *Khimiya Geterotsiklicheskikh Soedinenii*, **1987**, 9, 1173.
- (4) a) R. W. Murray, M. Singh, *Org. Synth.* **1998**, 9, 288; **1997**, 74, 91; b) H. Mikula, D. Svatunek, D. Lumpi, F. Glöckhofer, C. Hametner, J. Fröhlich, *Org. Process Res. Dev.* **2013**, 17, 313.
- (5) S.-S. Meng, Y. Liang, K.-S. Cao, L. Zou, X.-B. Lin, H. Yang, K. N. Houk, W.-H. Zheng, *J. Am. Chem. Soc.* **2014**, 136, 12249.
- (6) a) K. Weinges, R. Spänig, *Chemische Berichte*, **1968**, 101, 3010; b) M. R. Mason, Y. Su, R. A. Jacobson, J. G. Verkade, *Organometallics*, **1991**, 10, 2335.
- (7) a) S. Serra, C. Fuganti, *Helvetica Chimica Acta*, **2002**, 85, 2489; b) S. P. Chavan, P. K. Zubaidha, V. D. Dhondge, *Tetrahedron*, **1993**, 49, 6429.
- (8) a) S. K. Talluri, A. Sudalai, *Tetrahedron*, **2007**, 63, 9758; b) D. Wannaporn, T. Ishikawa, *Molecular Diversity*, **2005**, 9, 321.
- (9) J. Hudec, J. Huke, J. W. Liebeschuetz, *J. Chem. Soc., Perkin Trans.* **1998**, 2, 1129.

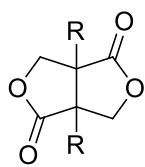

7a R=Ph

$^1\text{H}$  NMR and  $^{13}\text{C}$  NMR of 7a

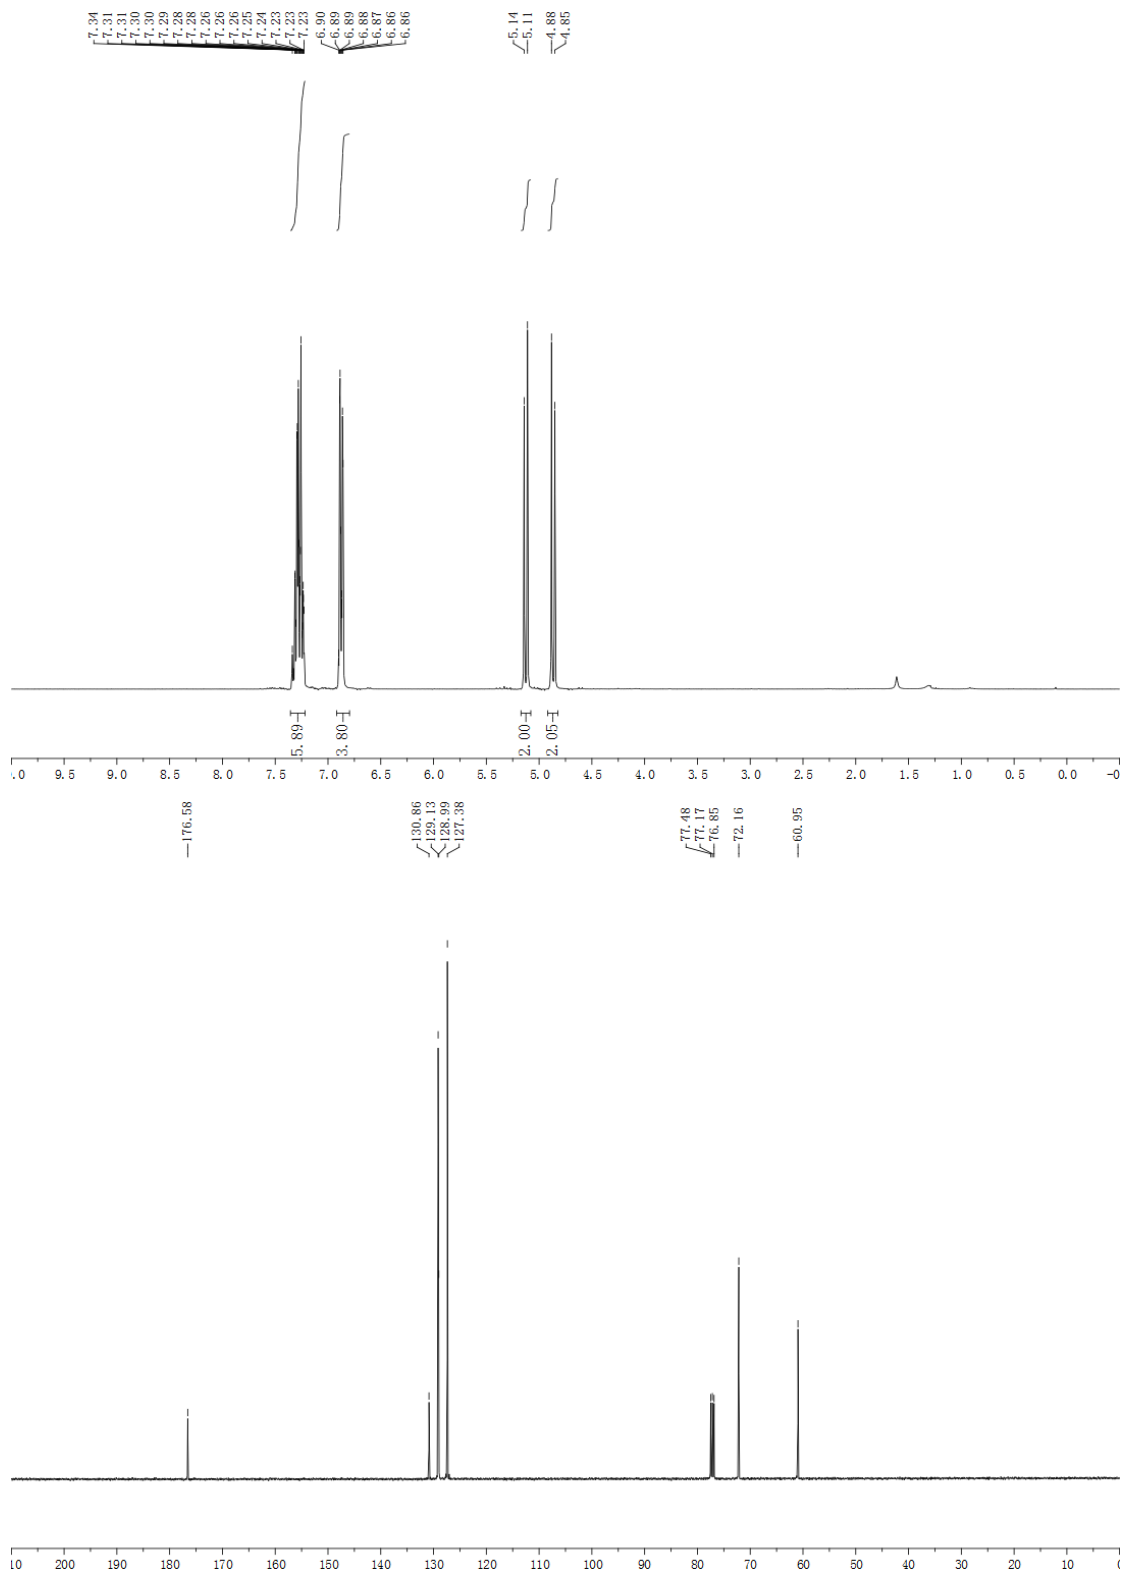

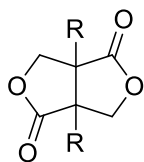

7b R=*p*-OMePh

$^1\text{H}$  NMR and  $^{13}\text{C}$  NMR of **7b**

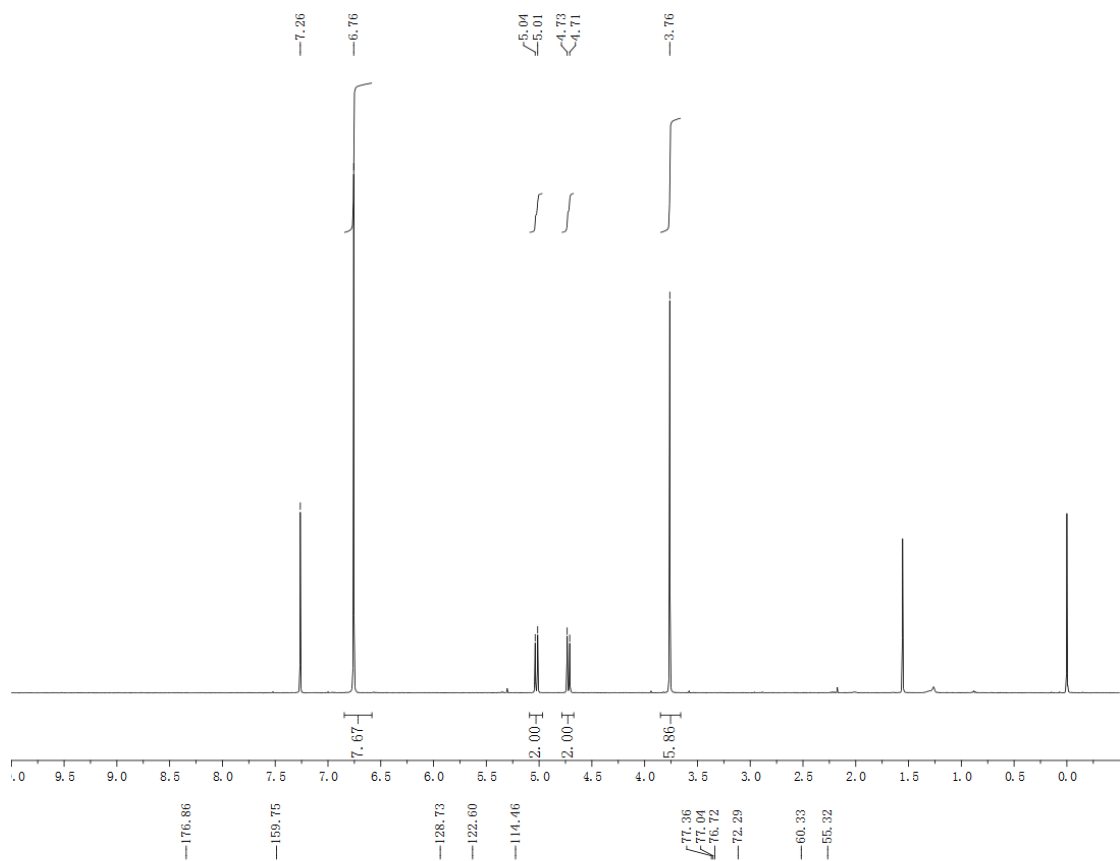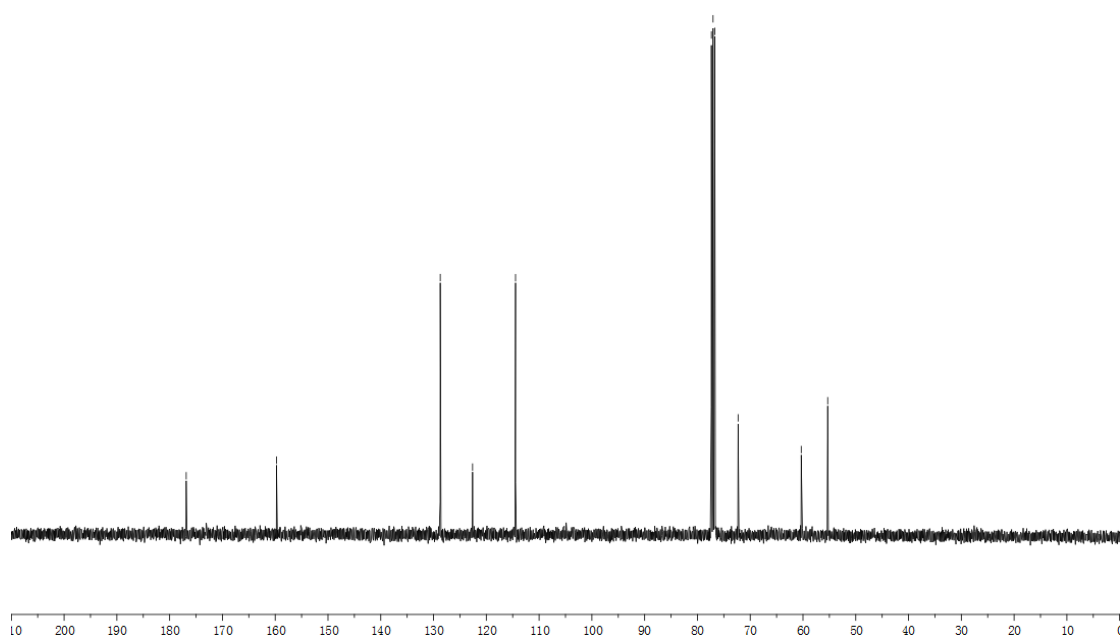

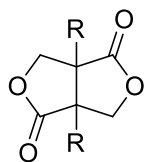

7c R=p-Cl-Ph

$^1\text{H}$  NMR and  $^{13}\text{C}$  NMR of 7c

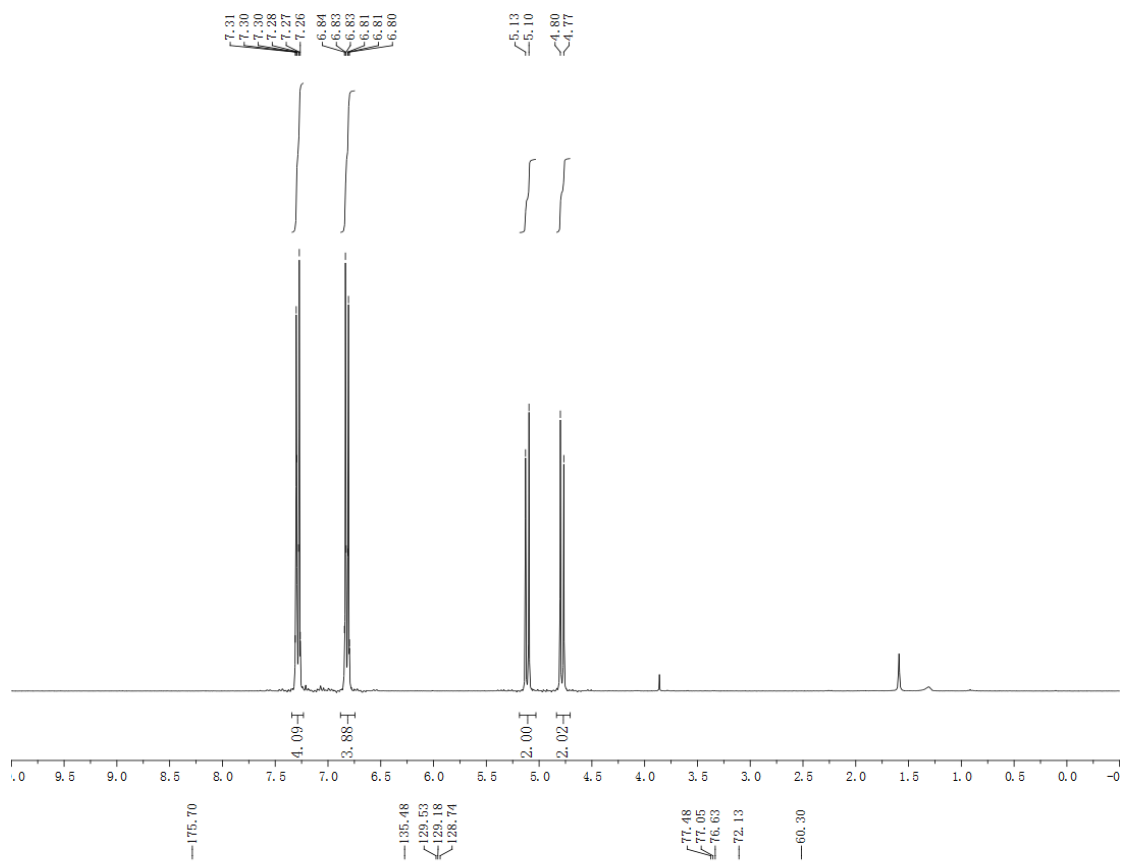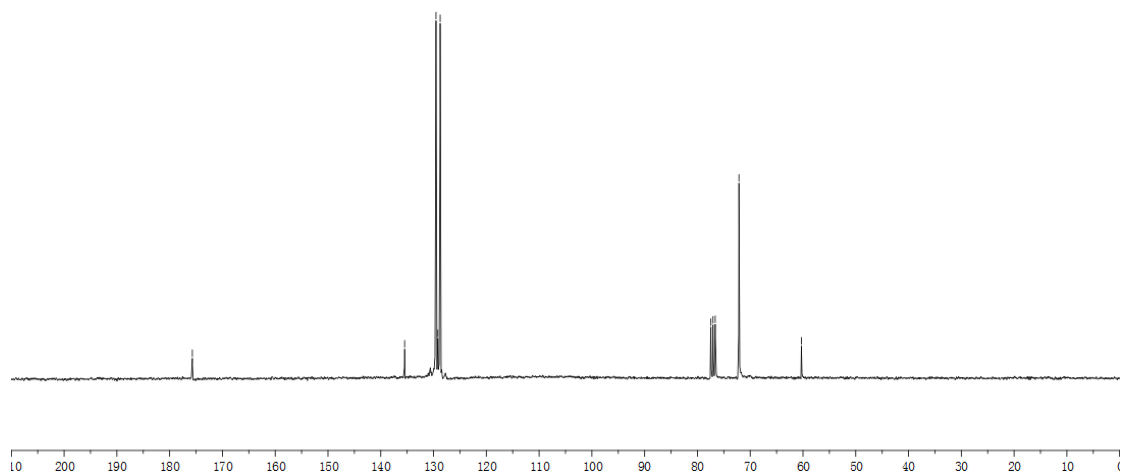

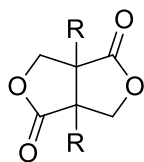

7d R=*p*-Me-Ph

$^1\text{H}$  NMR and  $^{13}\text{C}$  NMR of **7d**

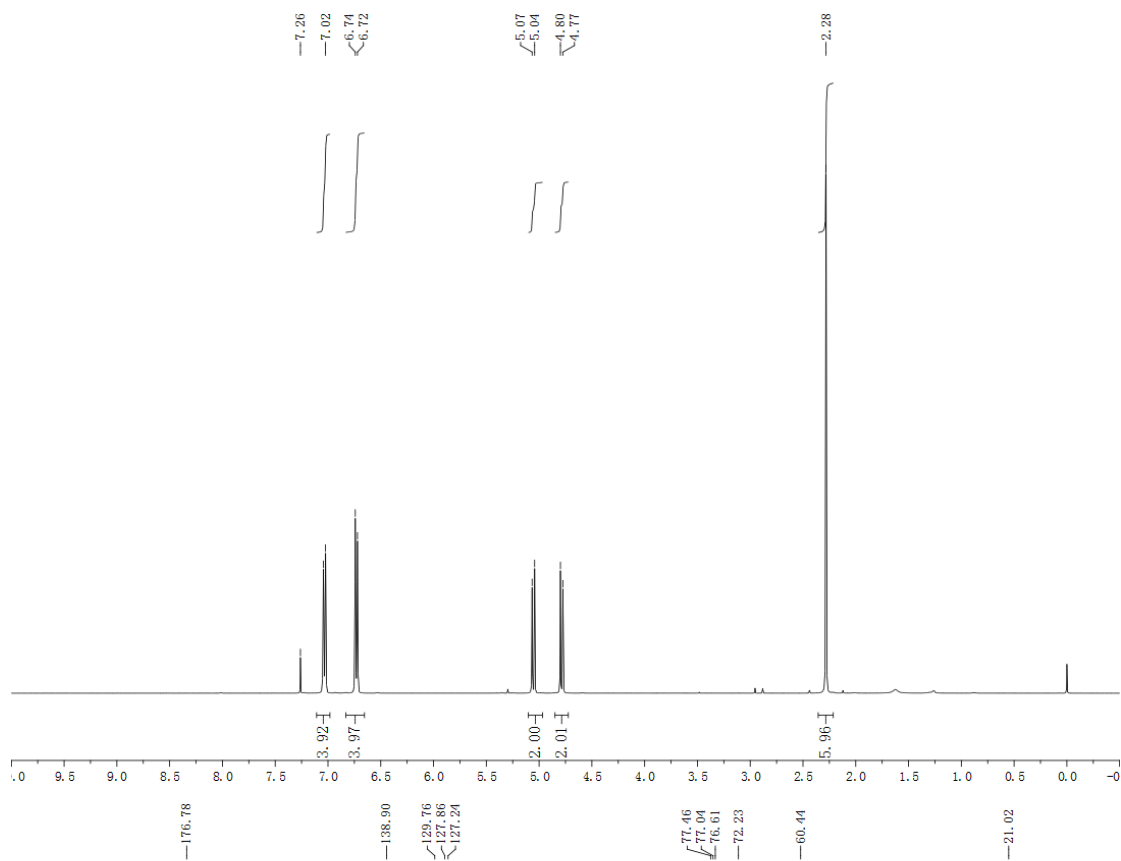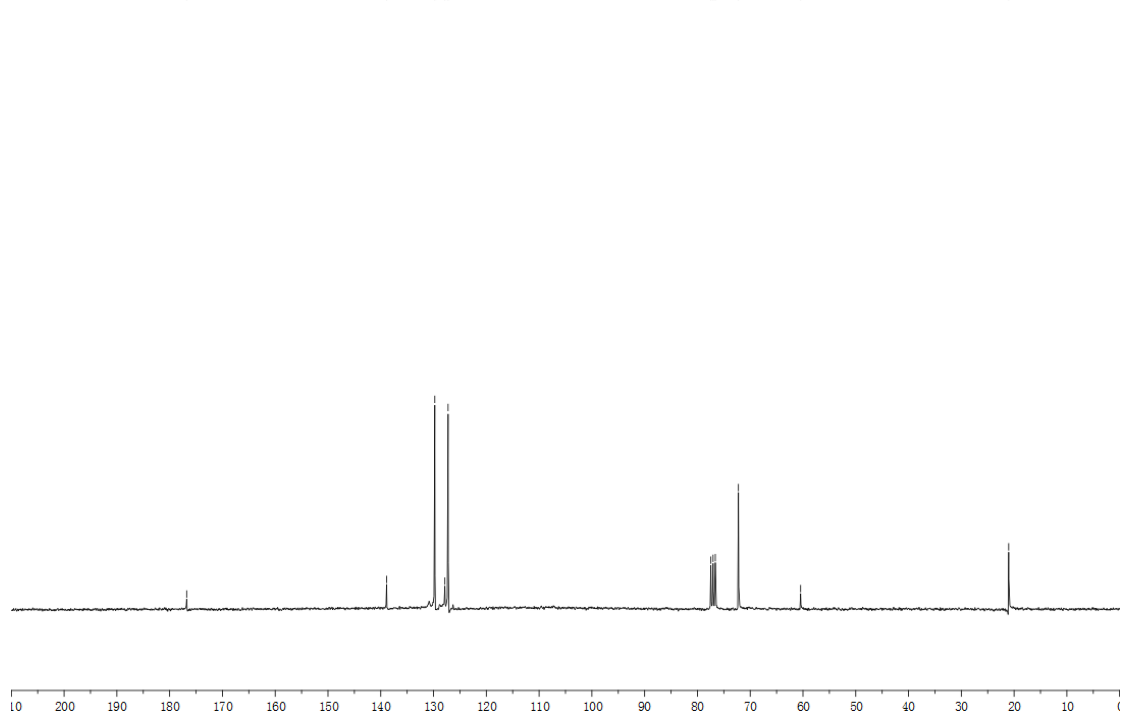



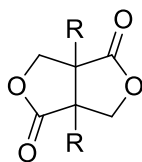

7e R=*m*-CF<sub>3</sub>-Ph

<sup>1</sup>H NMR and <sup>13</sup>C NMR of 7e

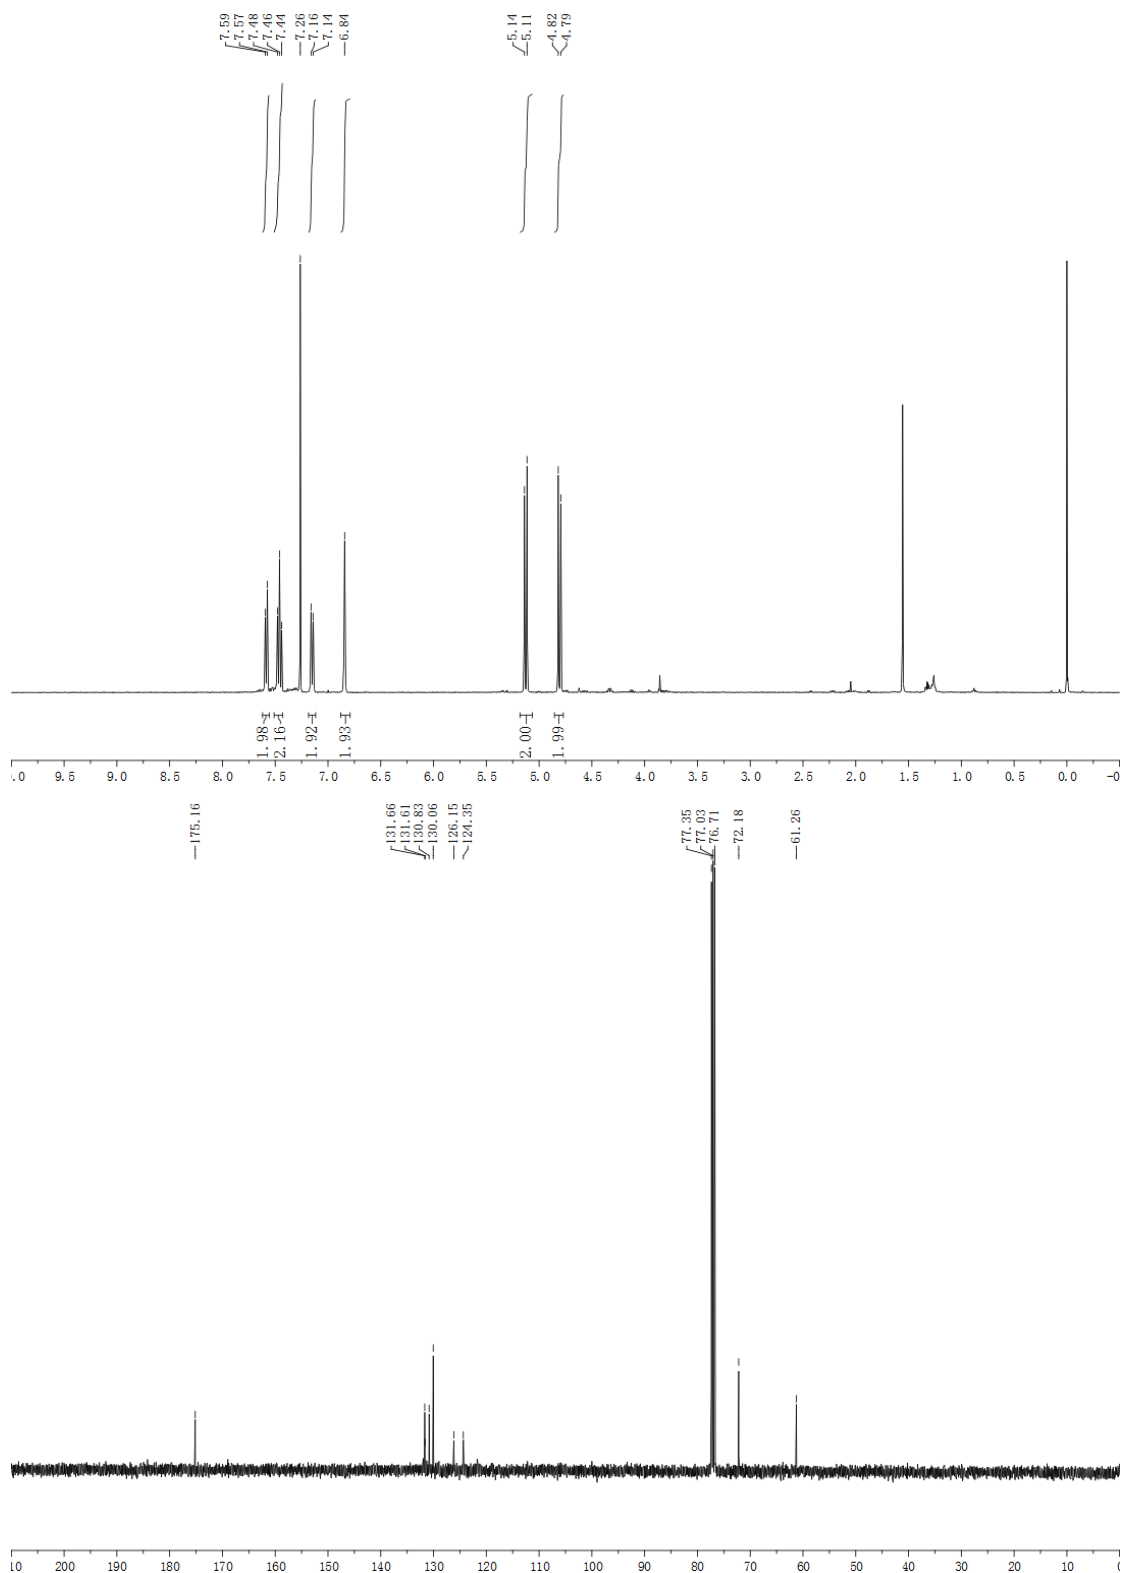

$^{19}\text{F}$  NMR of **7e**

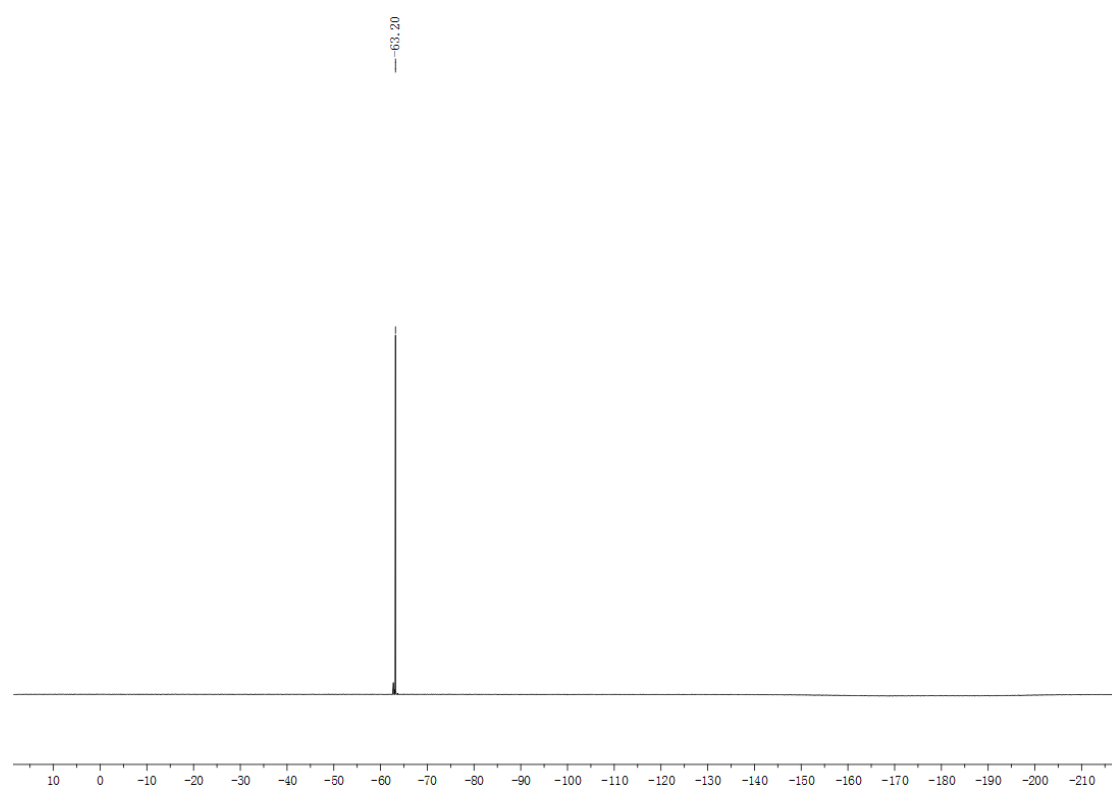

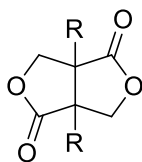

7f R=2-Naphthyl

$^1\text{H}$  NMR and  $^{13}\text{C}$  NMR of **7f**

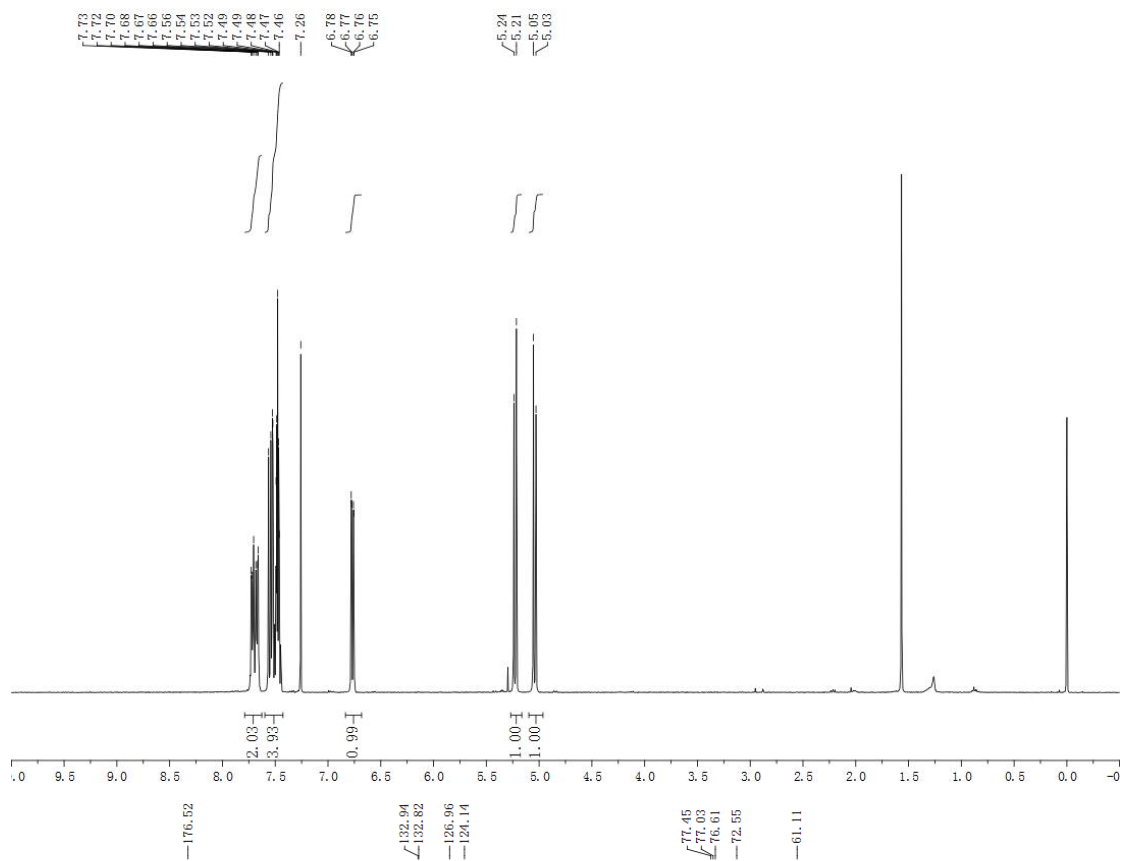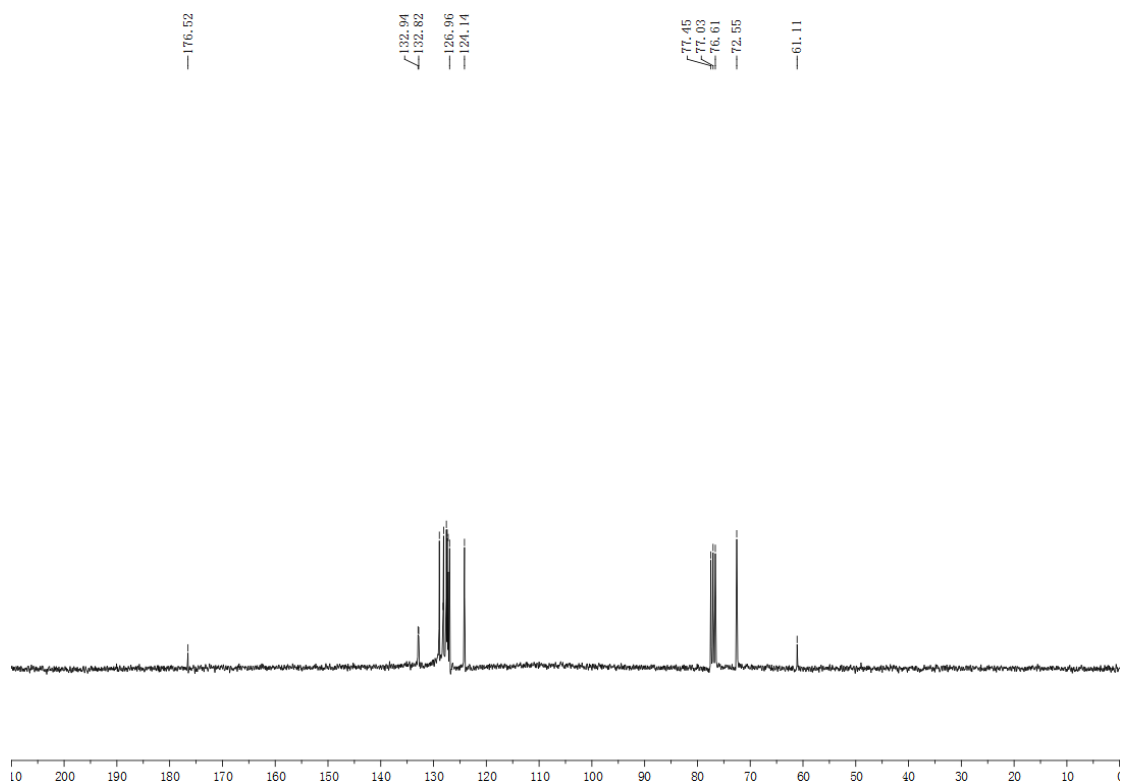

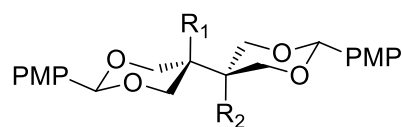

1a  $R_1=R_2=Ph$

$^1H$  NMR and  $^{13}C$  NMR of **1a**

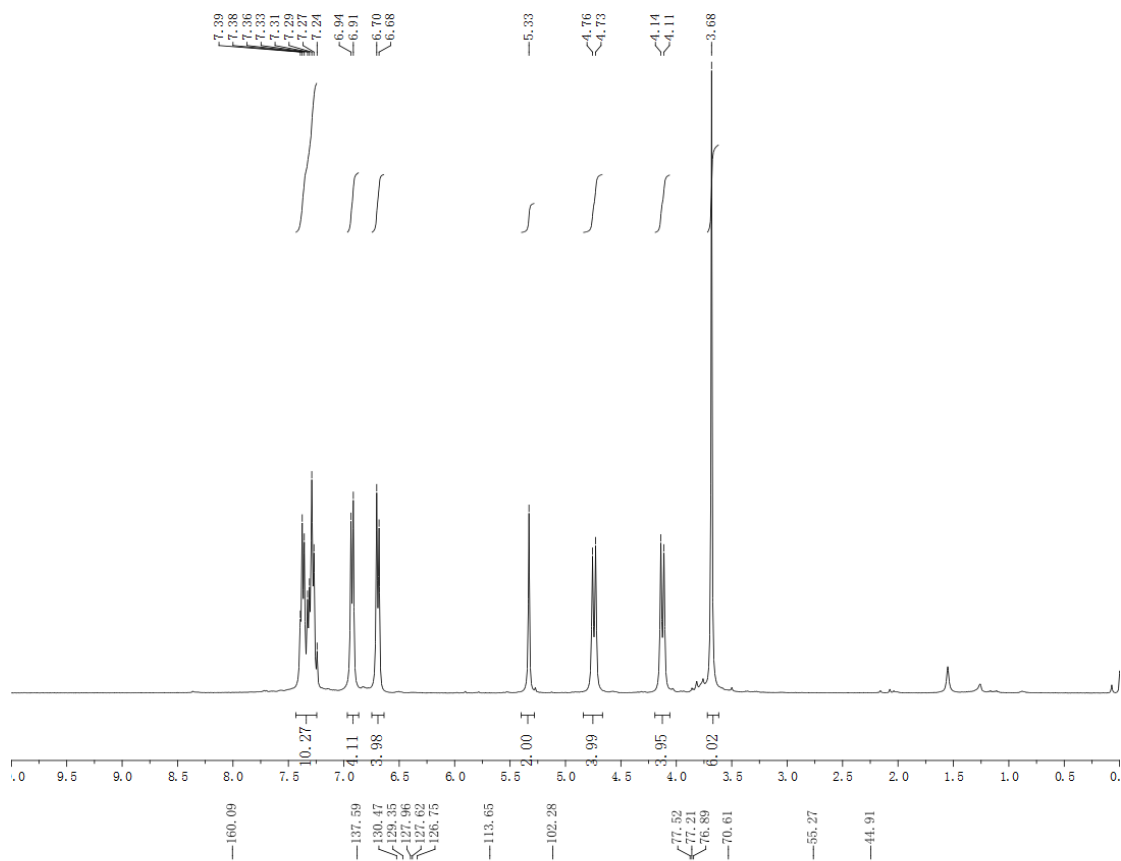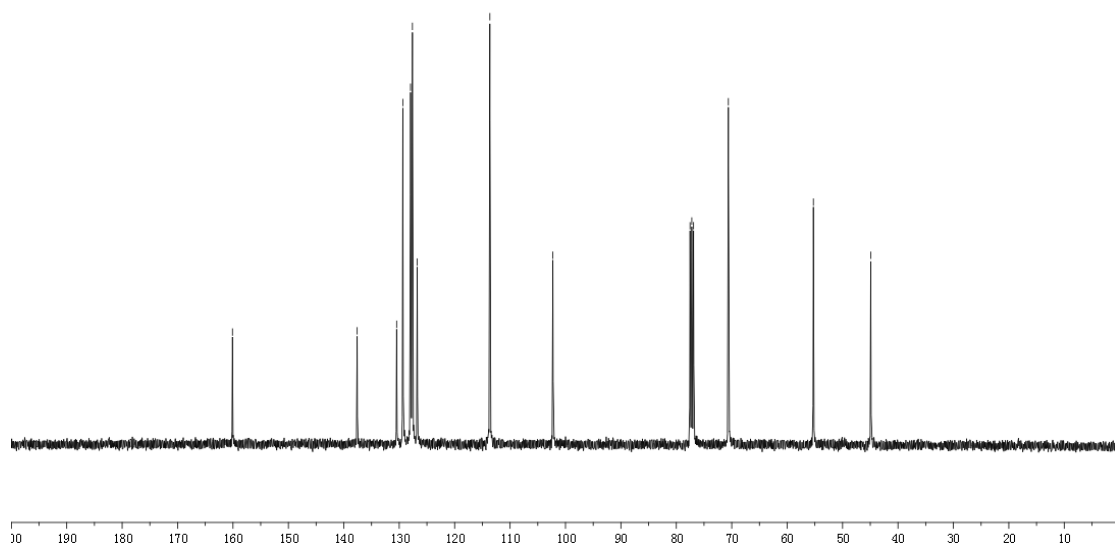

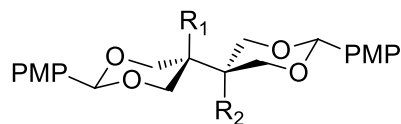

1b  $R_1=R_2=p\text{-MeO-Ph}$

$^1\text{H}$  NMR and  $^{13}\text{C}$  NMR of **1b**

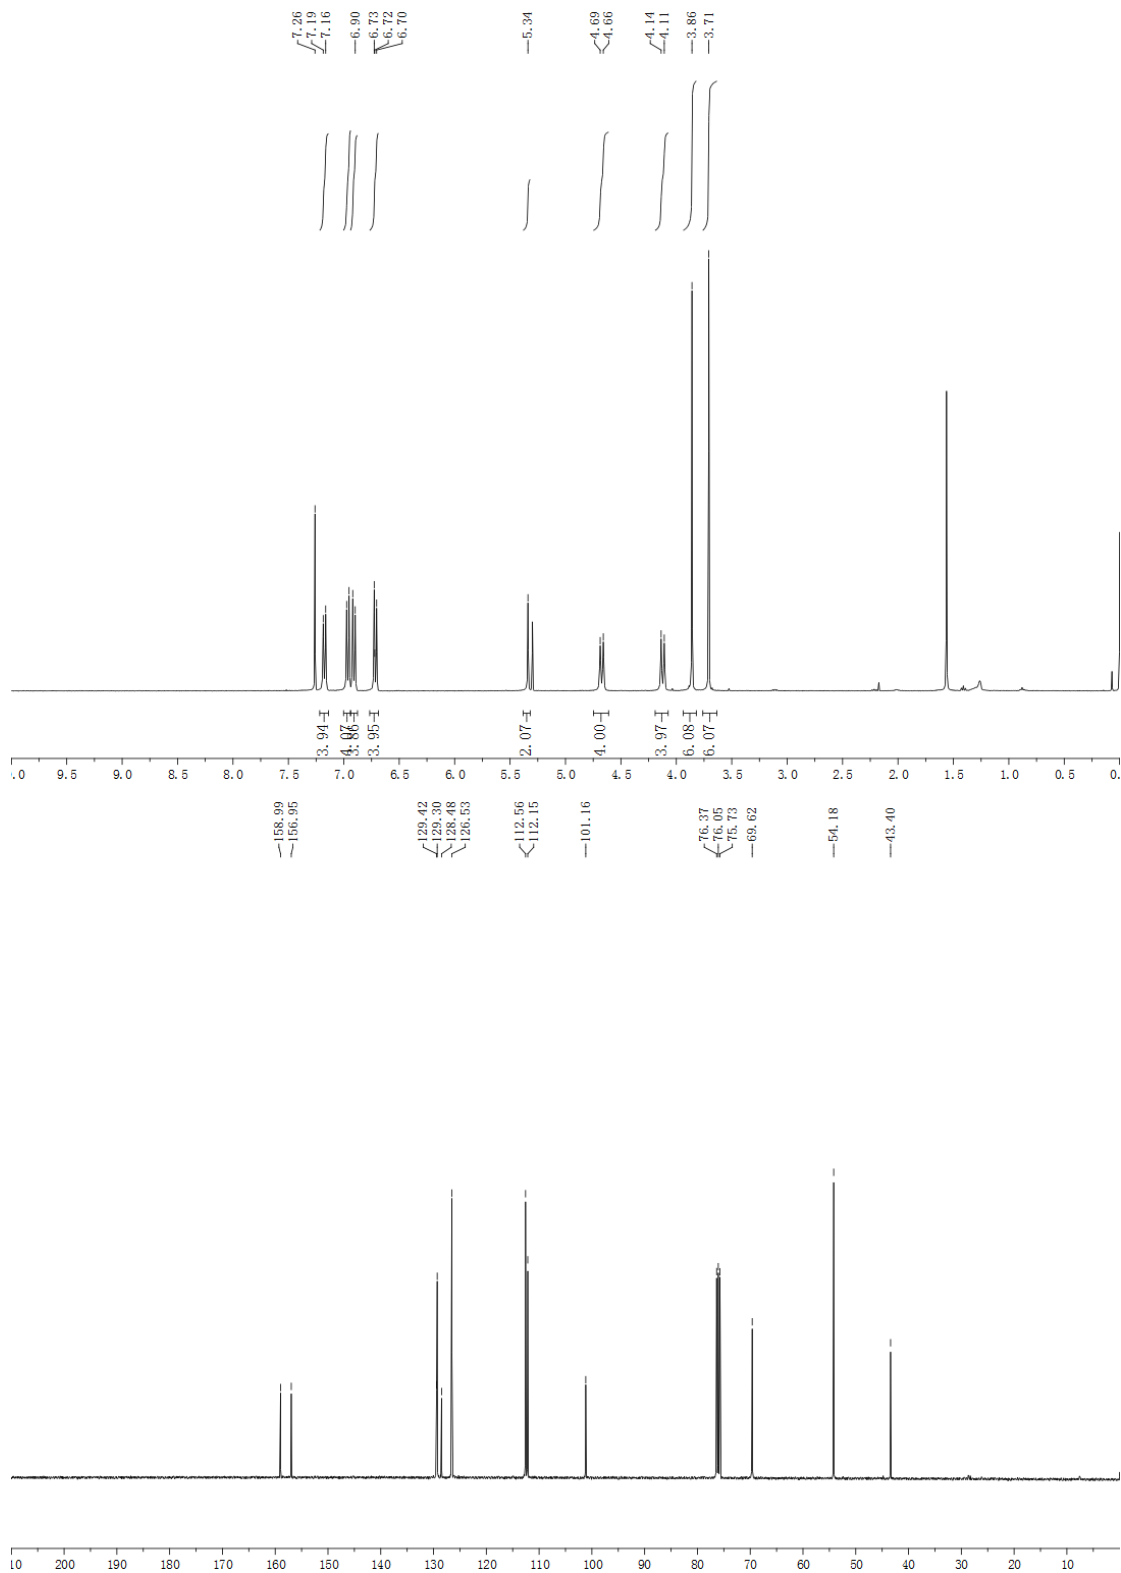

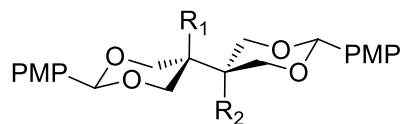

1c  $R_1=R_2=p\text{-Cl-Ph}$

$^1\text{H}$  NMR and  $^{13}\text{C}$  NMR of **1c**

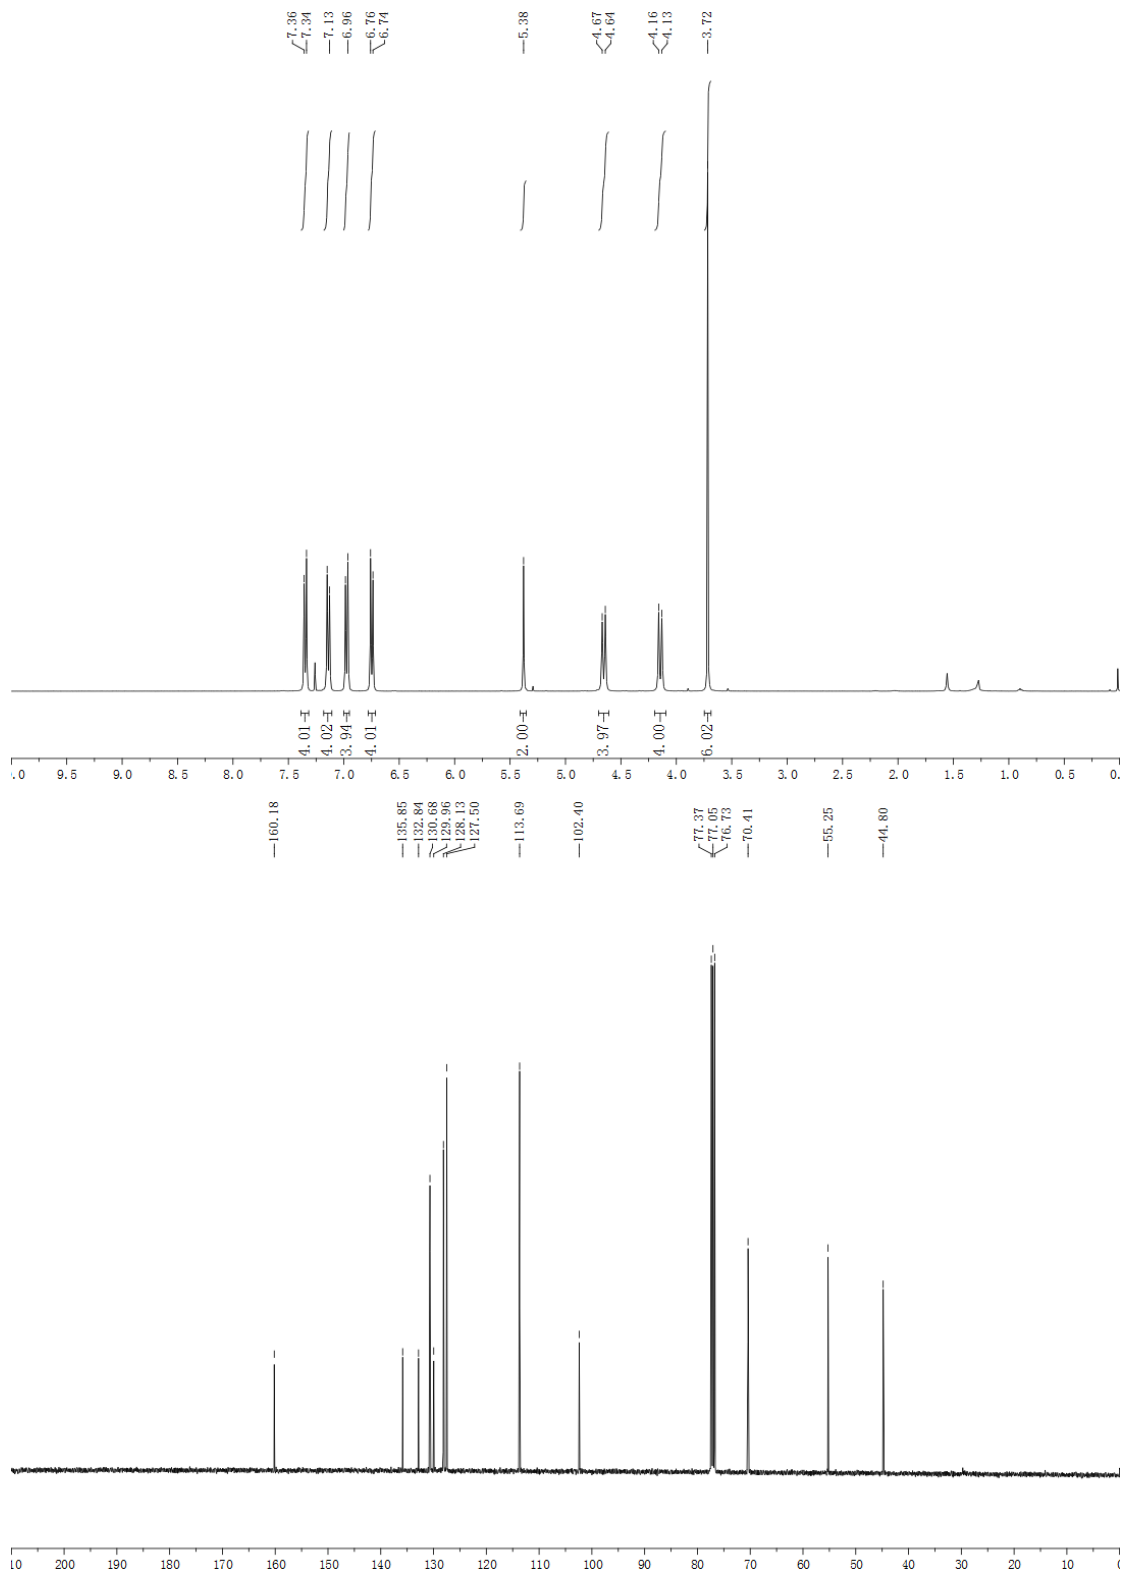

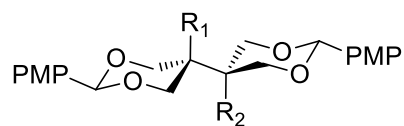

1d  $R_1=R_2=p\text{-Me-Ph}$

$^1\text{H}$  NMR and  $^{13}\text{C}$  NMR of **1d**

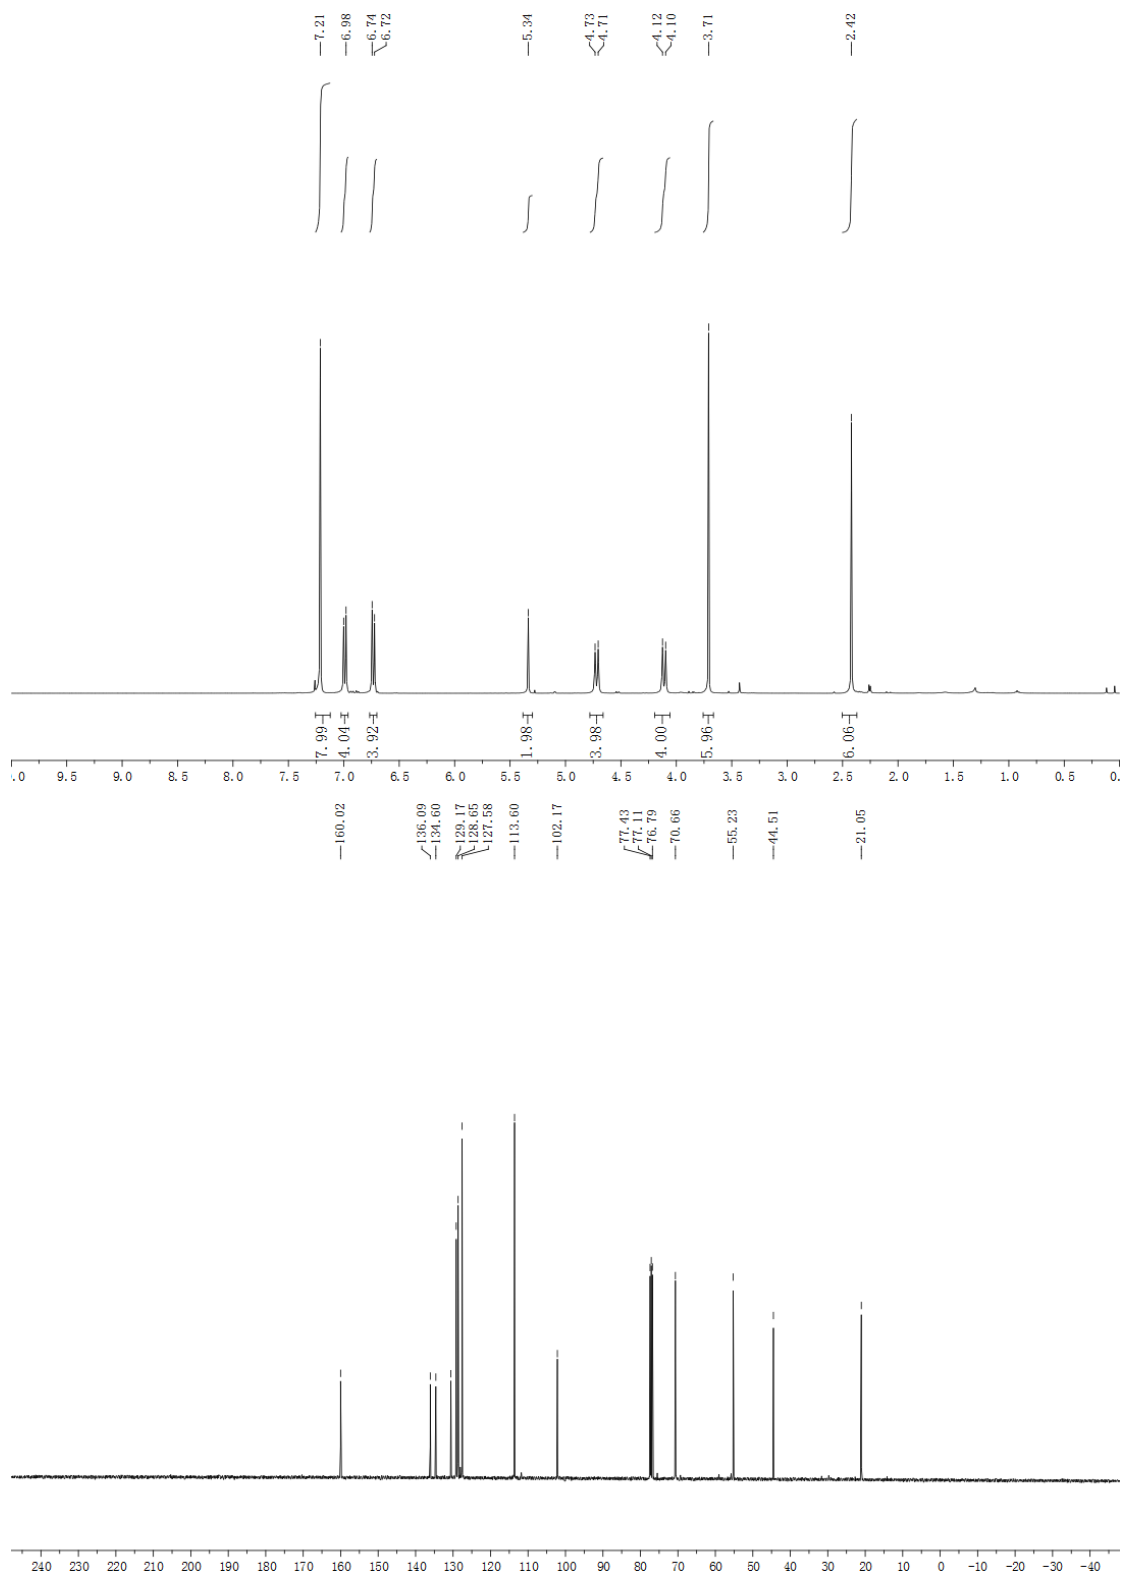

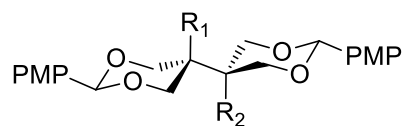

1e  $R_1=R_2=m\text{-CF}_3\text{-Ph}$

$^1\text{H}$  NMR and  $^{13}\text{C}$  NMR of **1e**

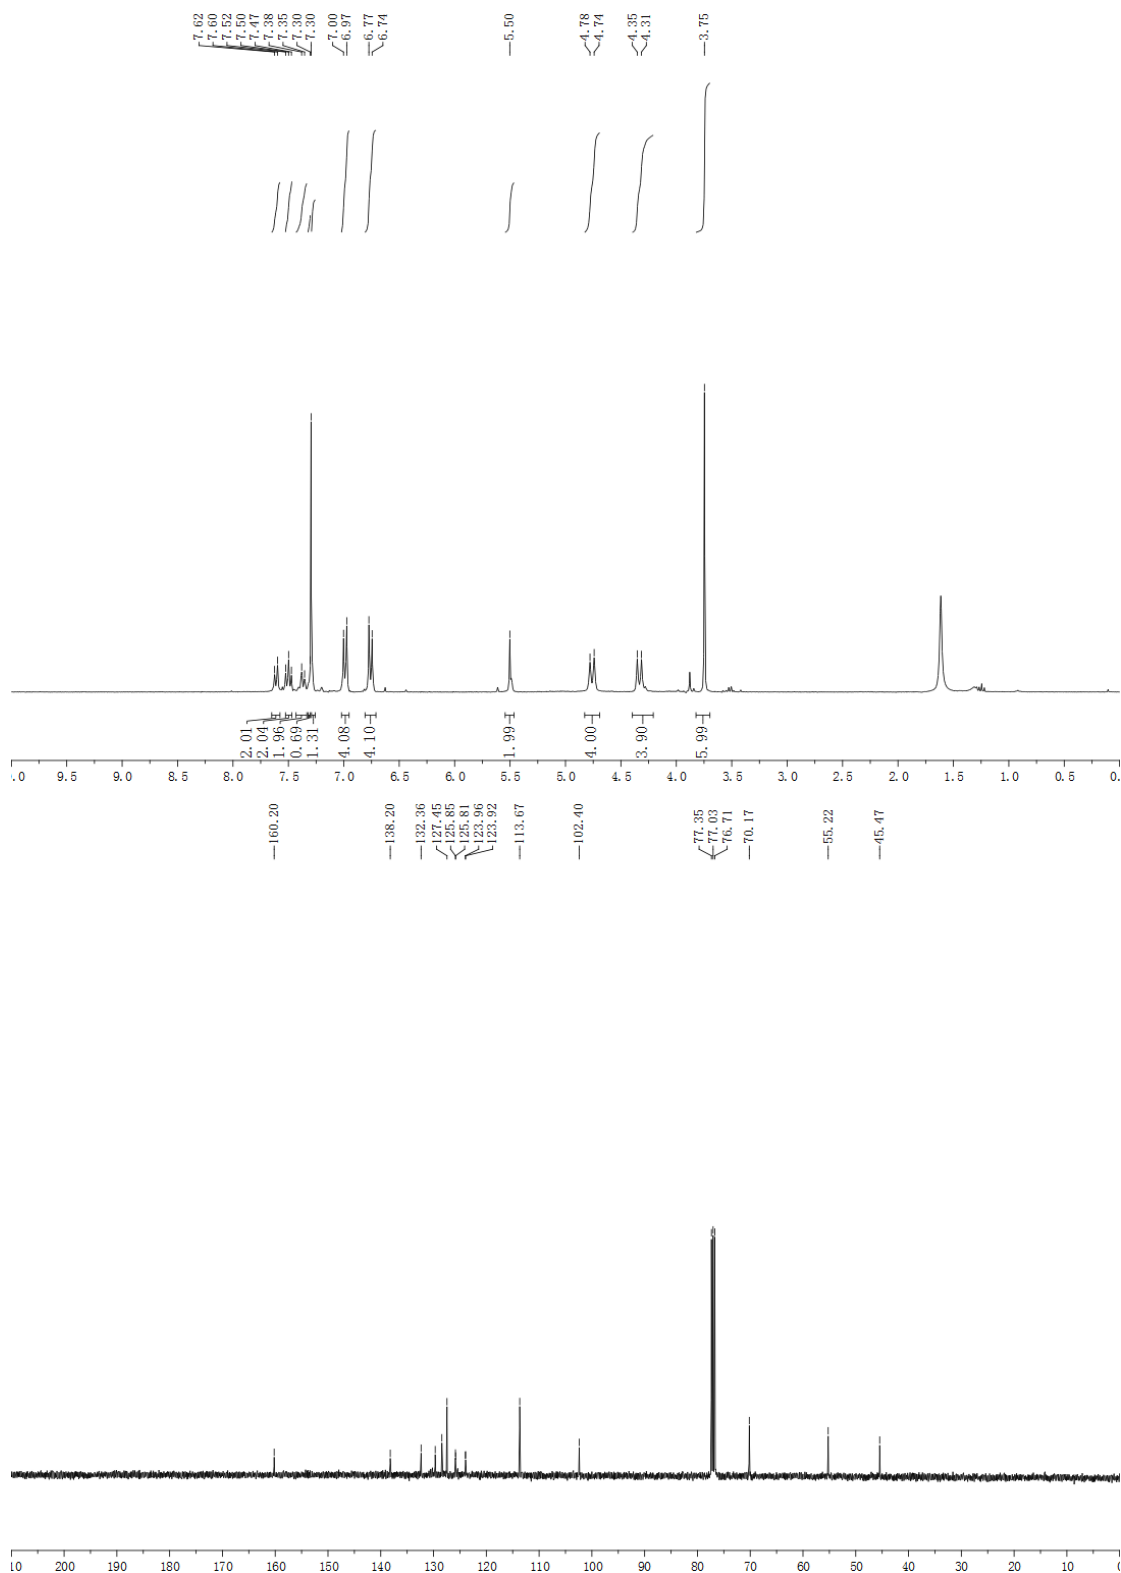



$^{19}\text{F}$  NMR of **1e**

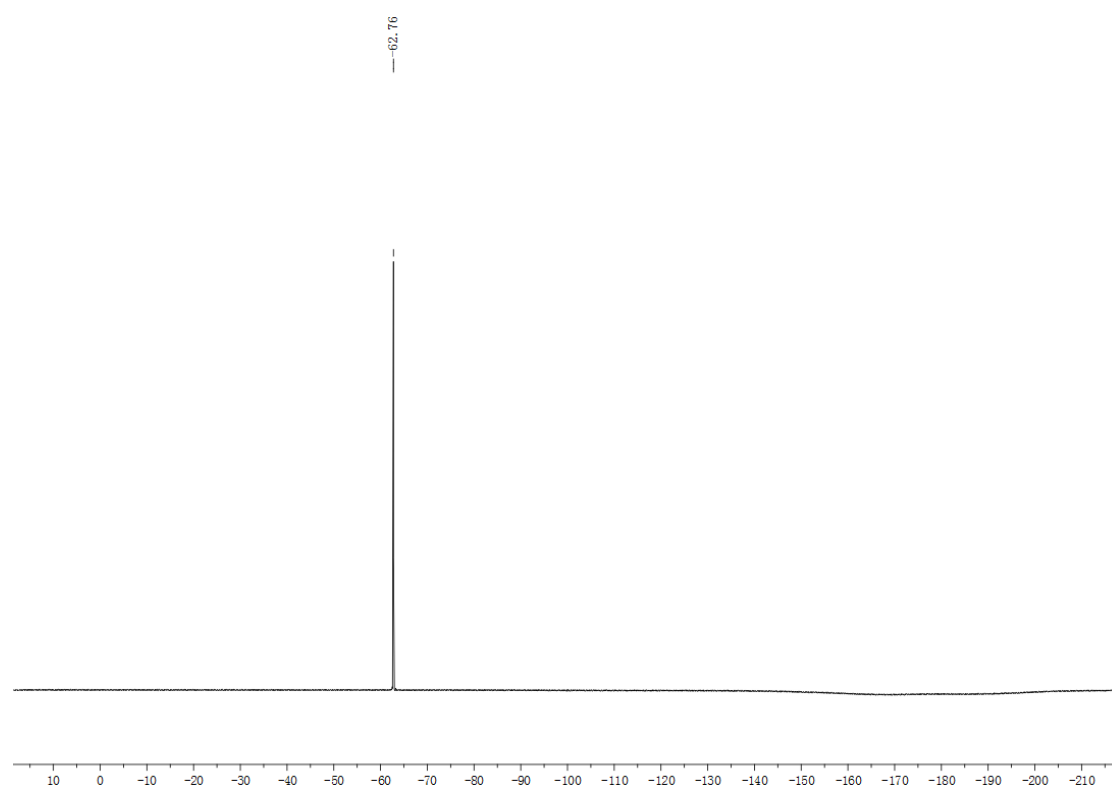

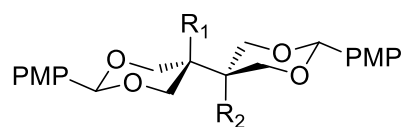

1f  $R_1=R_2=2\text{-Naphthyl}$

$^1\text{H}$  NMR and  $^{13}\text{C}$  NMR of **1f**

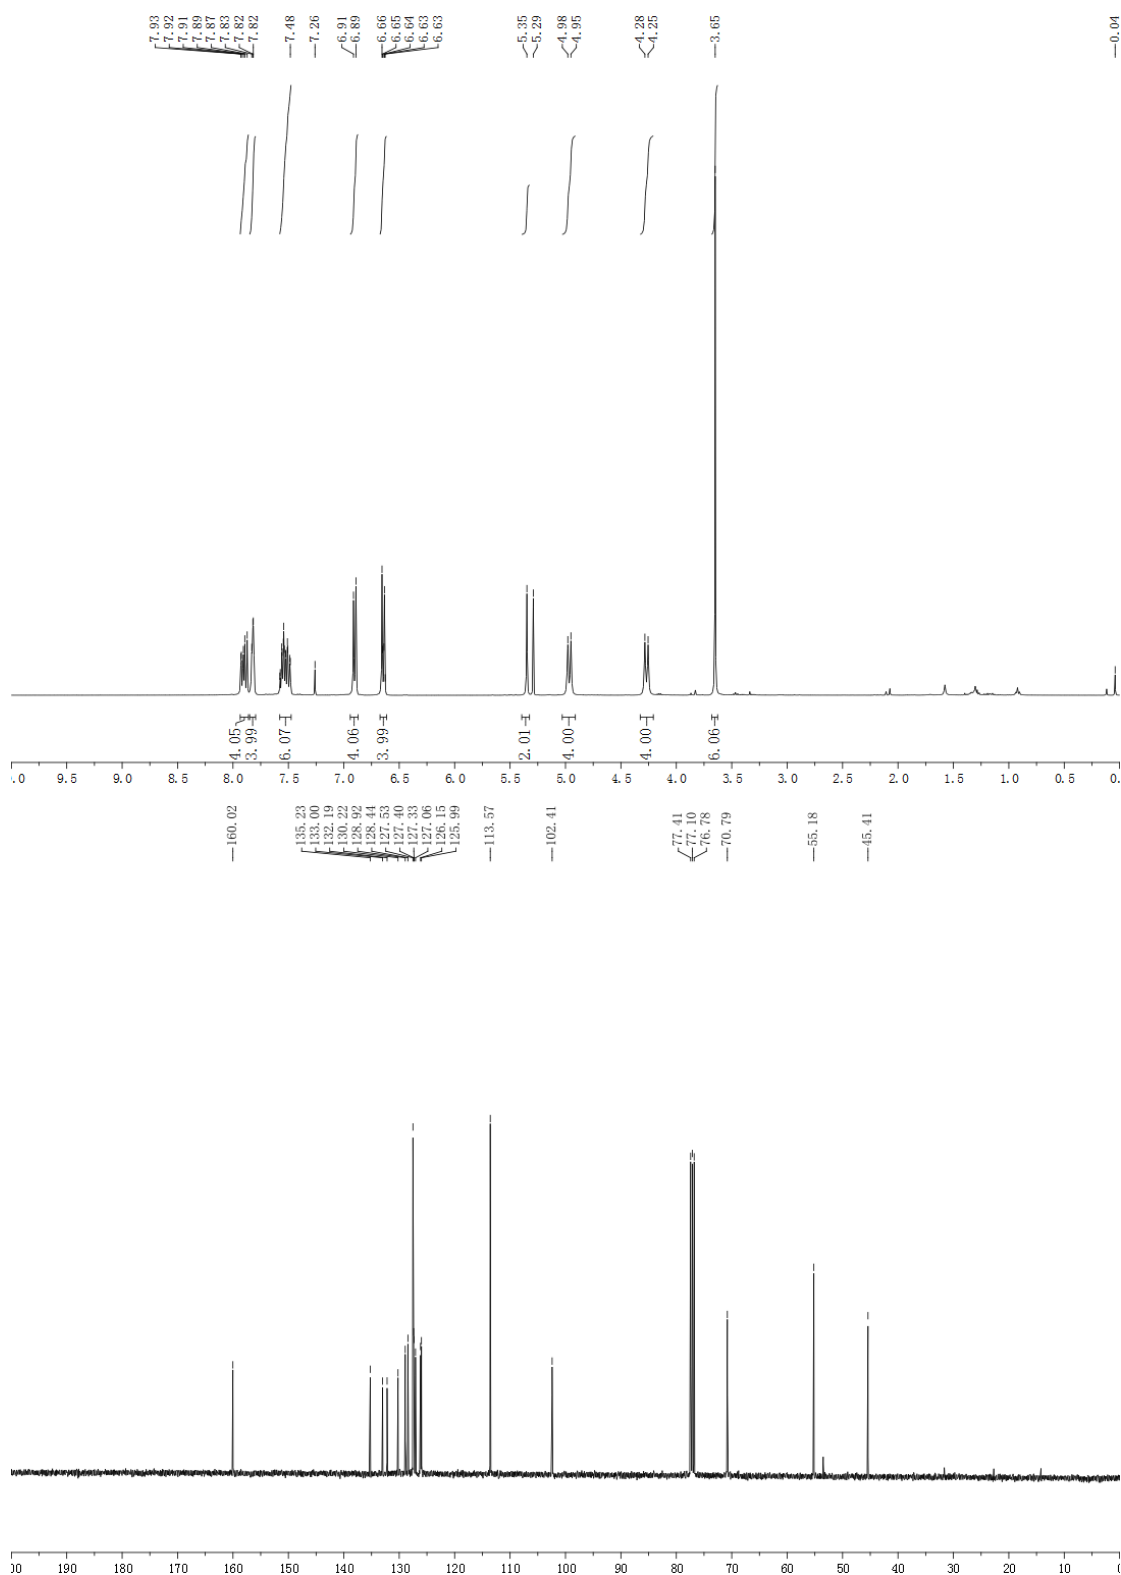

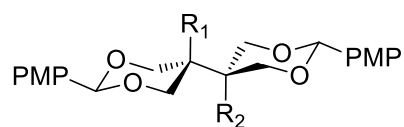

1g  $R_1=R_2=Me$

$^1H$  NMR and  $^{13}C$  NMR of **1g**

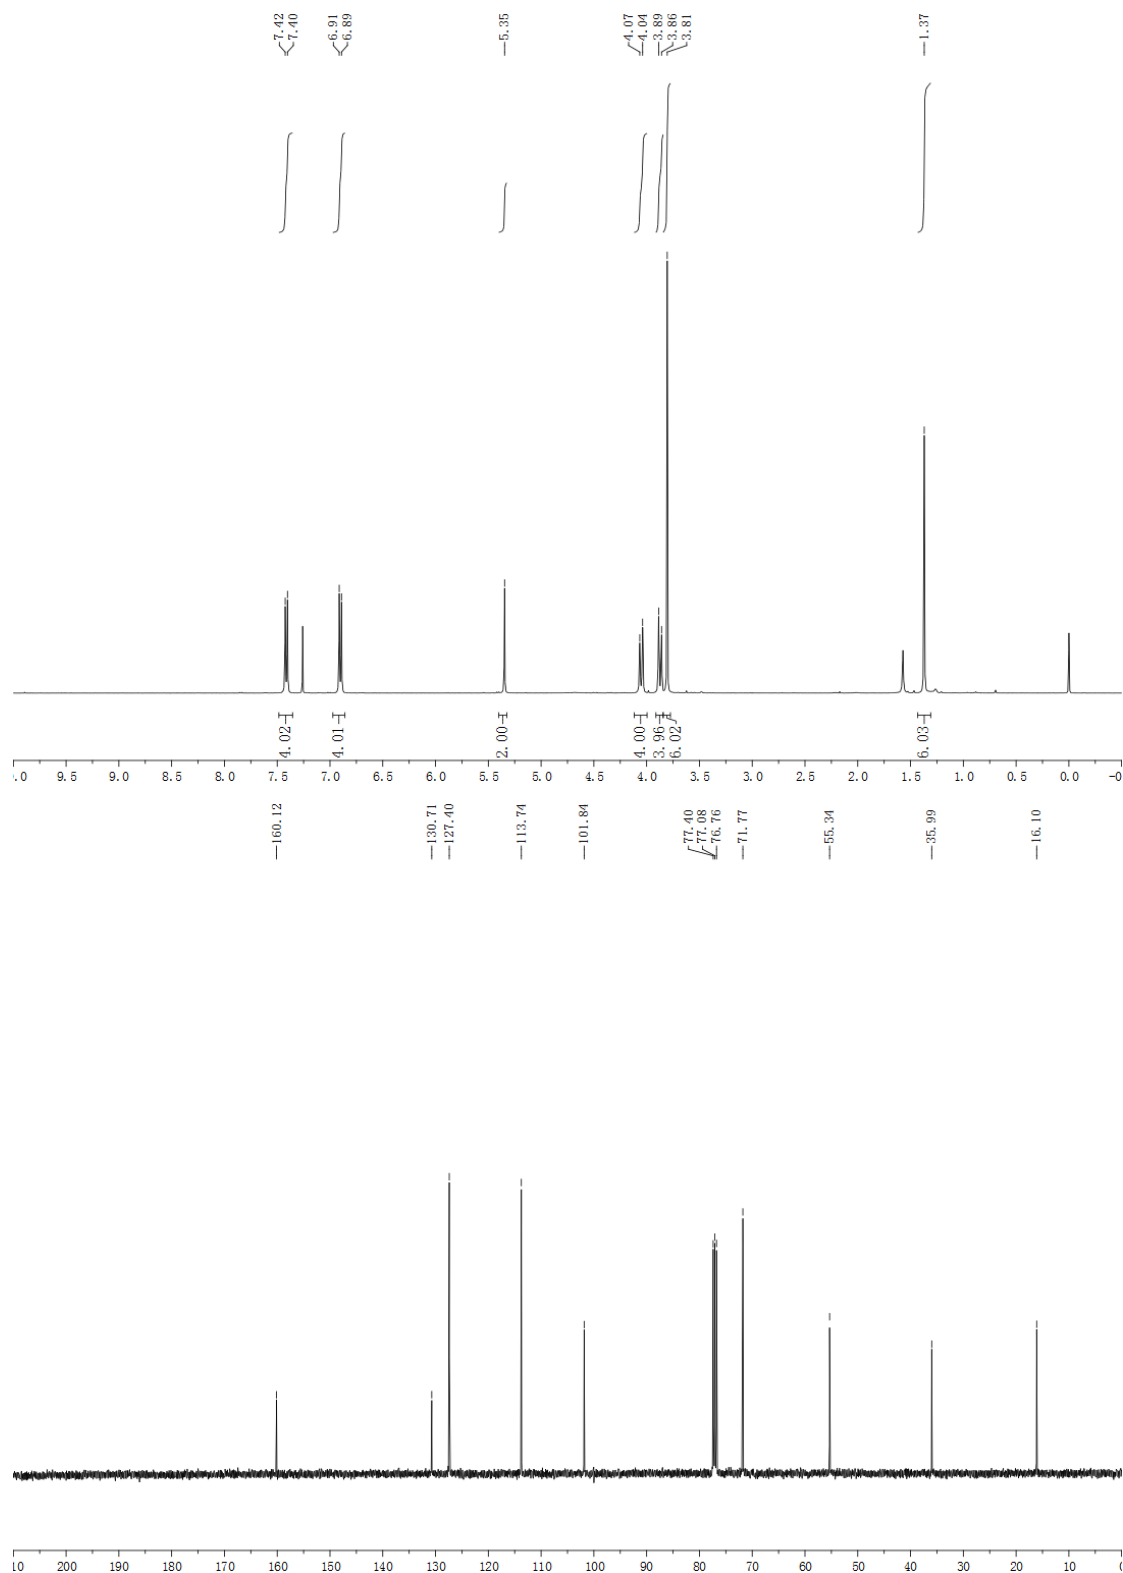



1h  $R_1=R_2=Et$

$^1H$  NMR and  $^{13}C$  NMR of **1h**

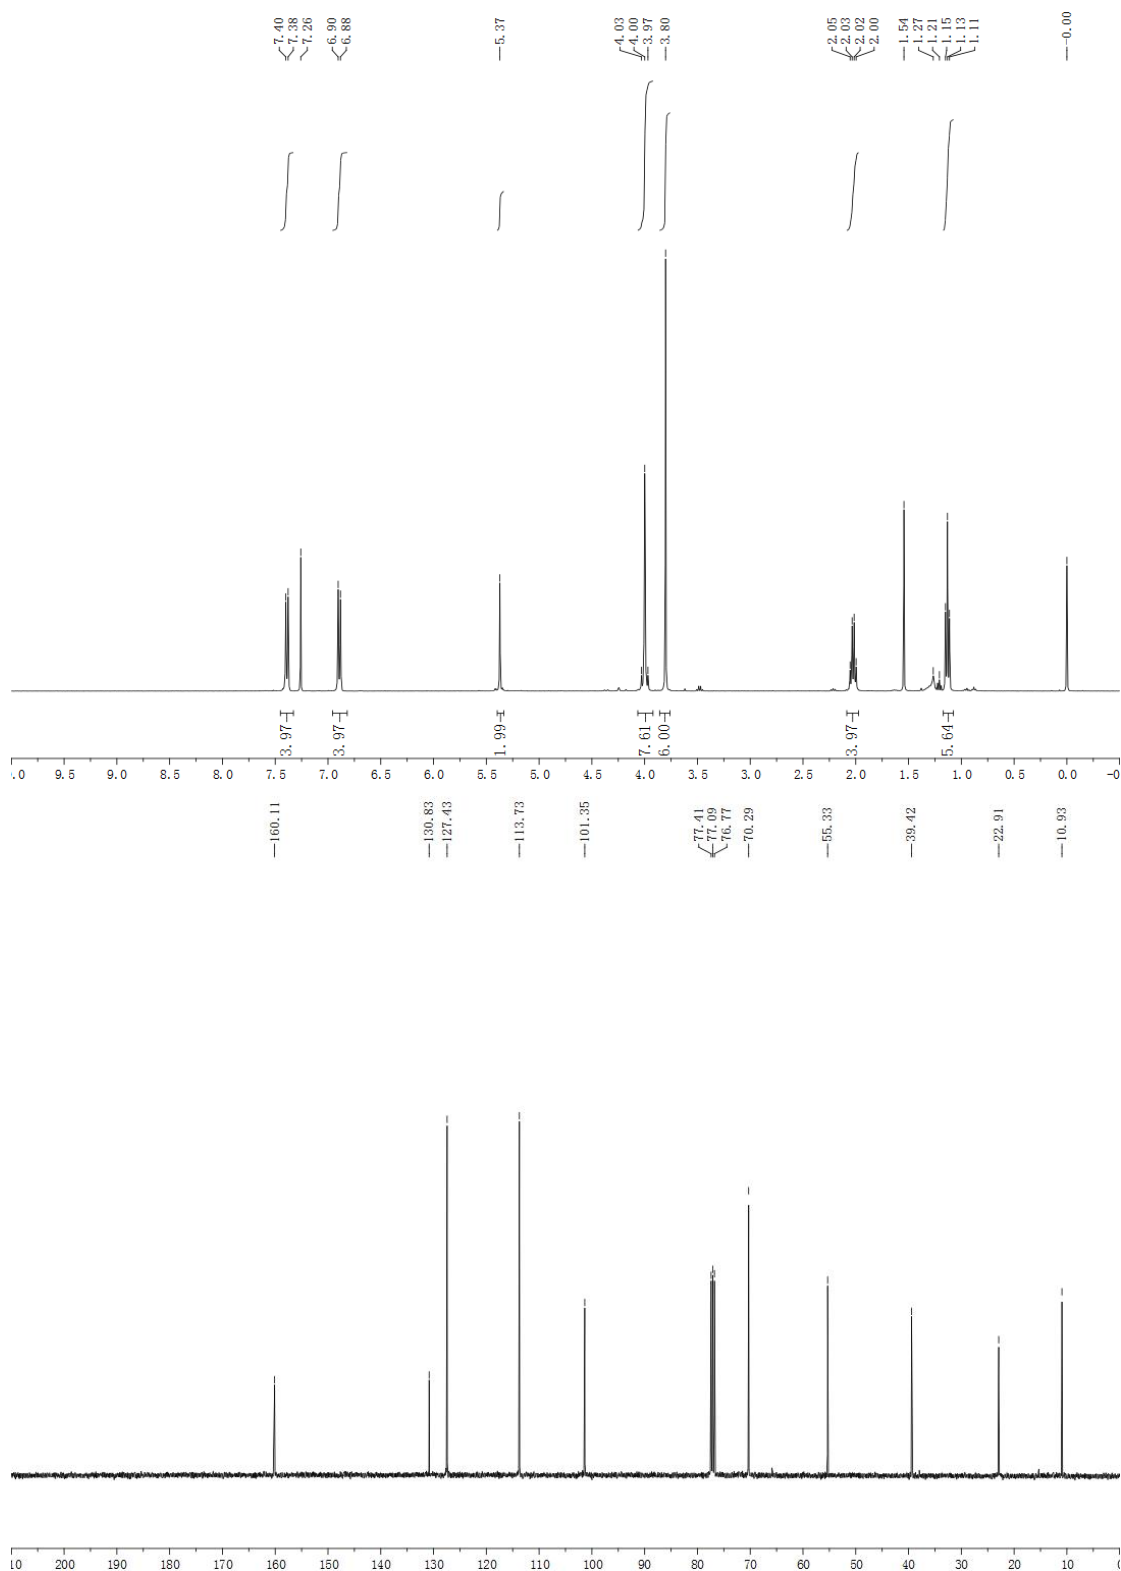

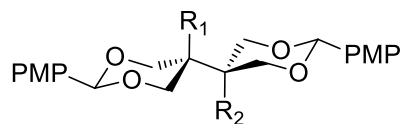

1i R<sub>1</sub>=Bn, R<sub>2</sub>=Me

<sup>1</sup>H NMR and <sup>13</sup>C NMR of **1i**

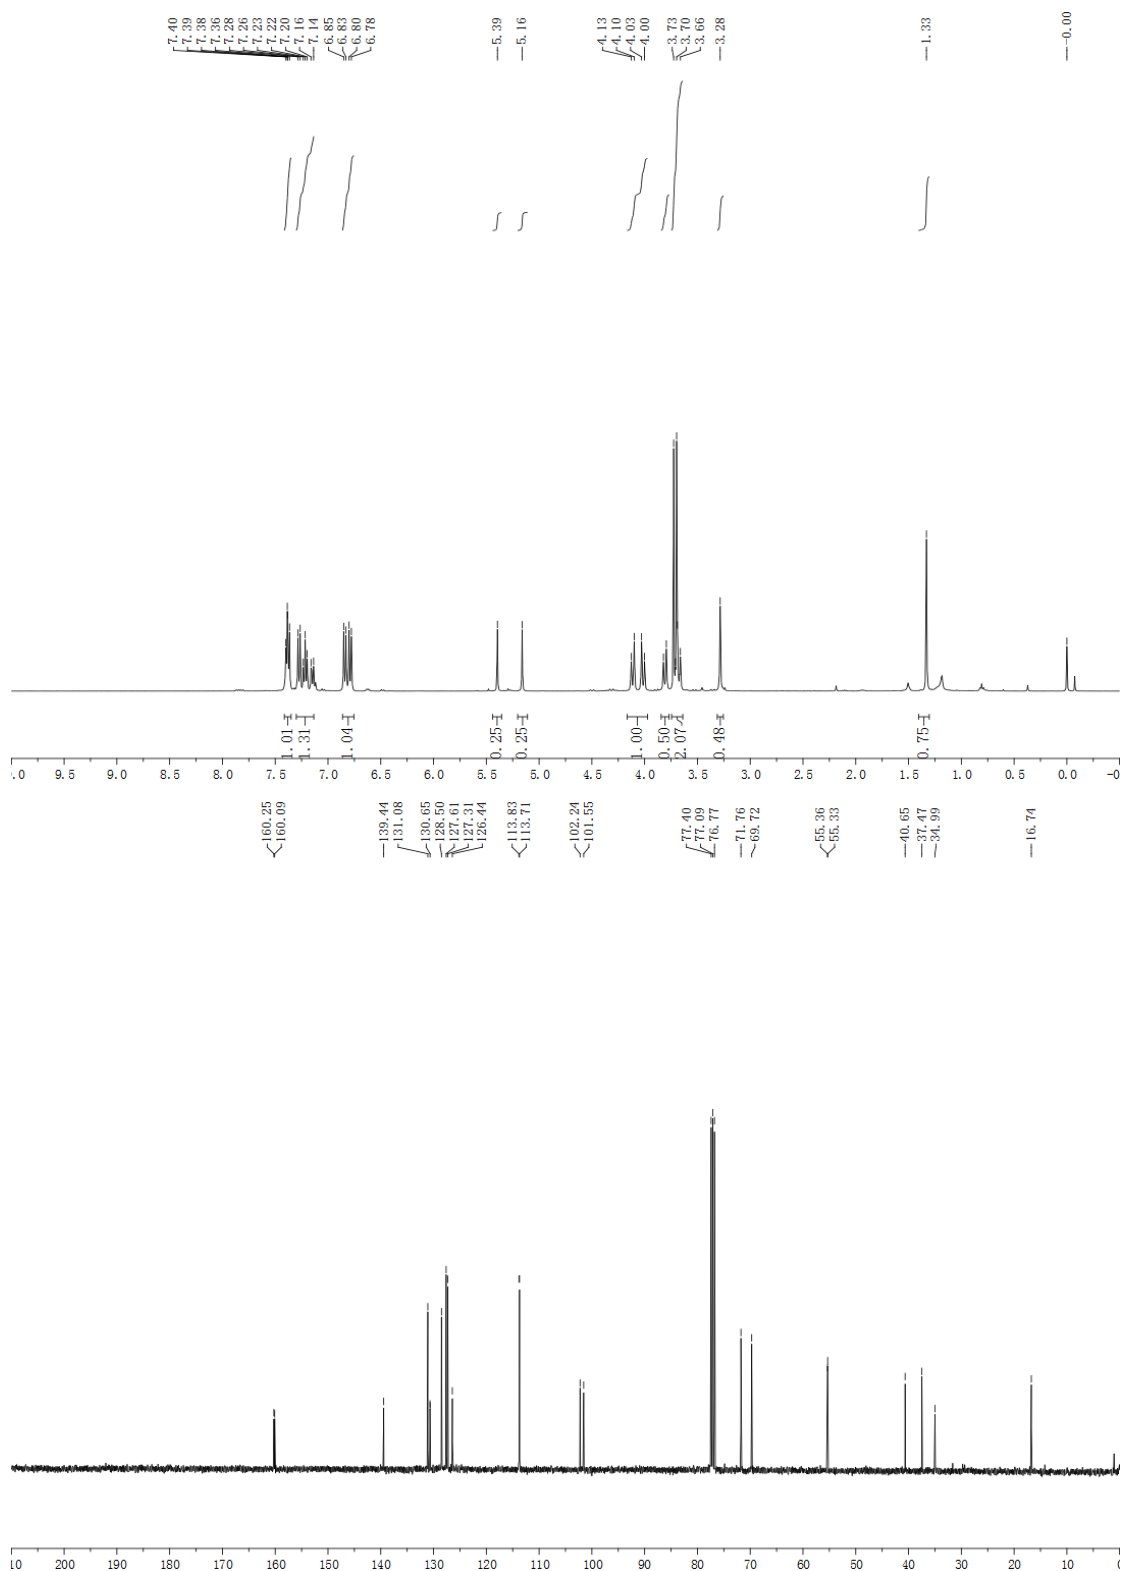

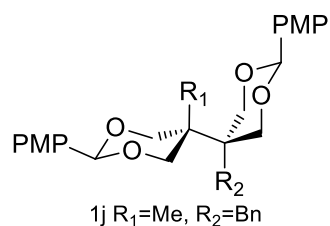

<sup>1</sup>H NMR and <sup>13</sup>C NMR of **1j**

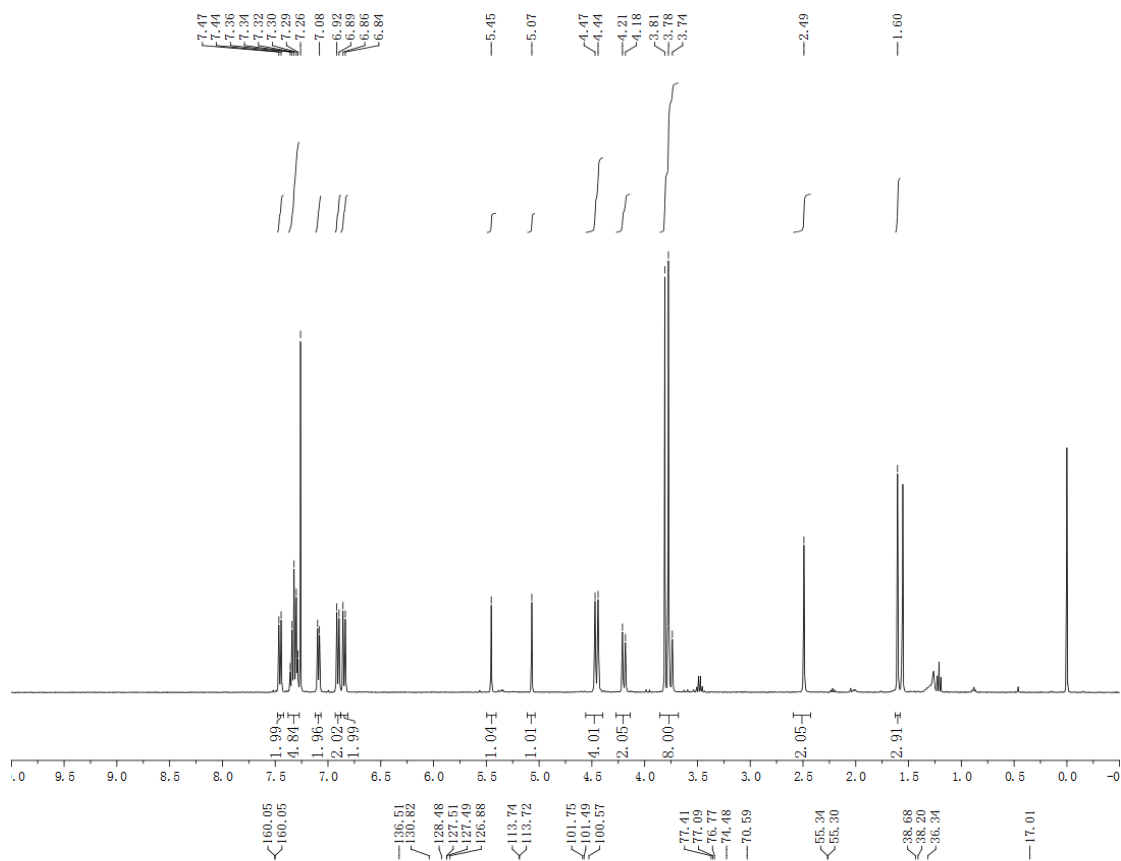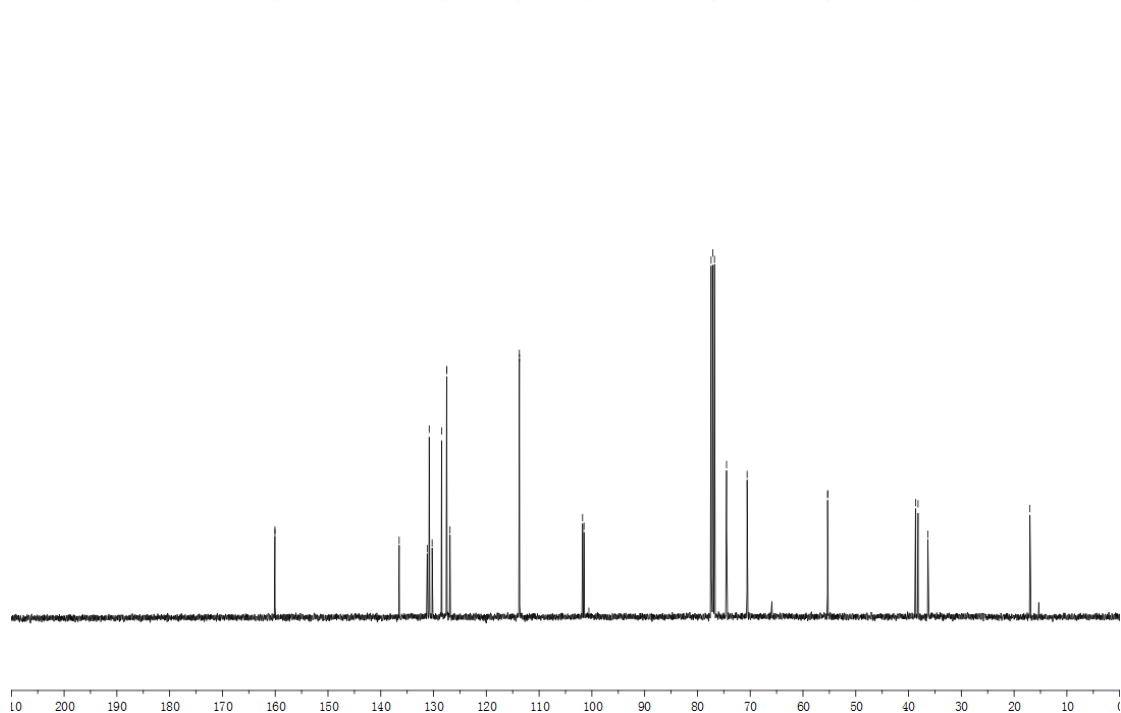

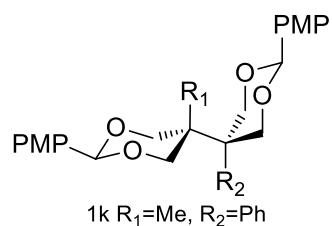

$^1H$  NMR and  $^{13}C$  NMR of **1k**

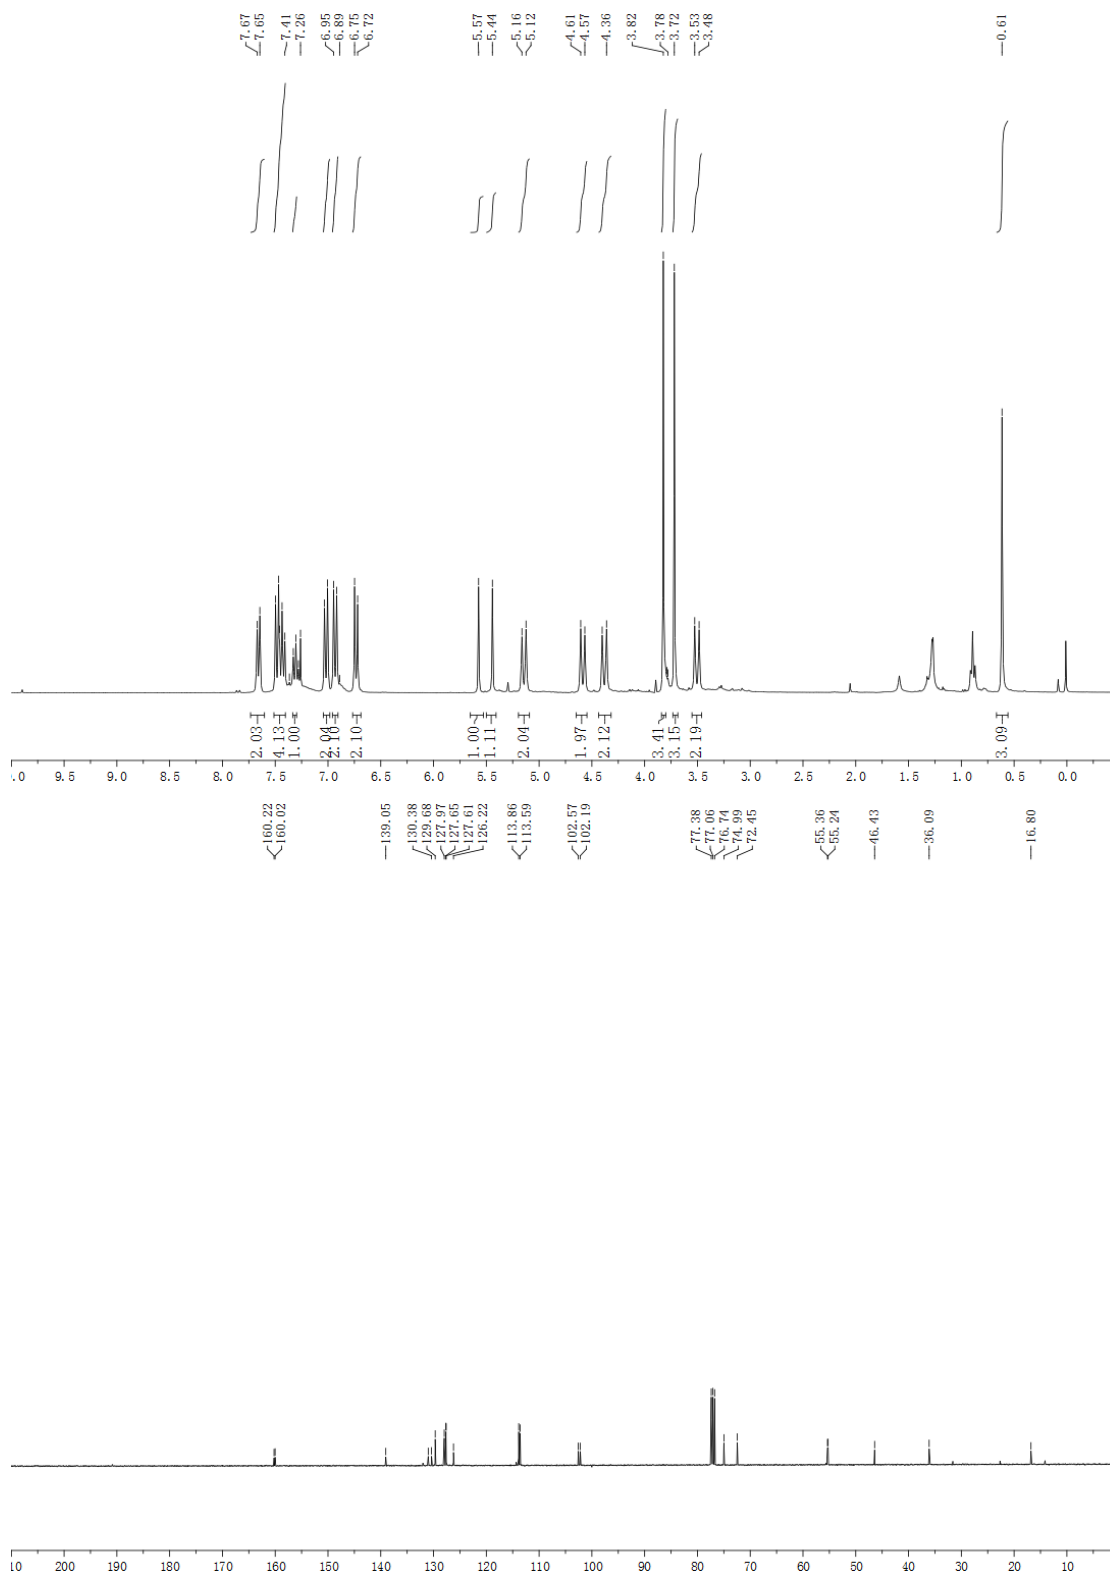

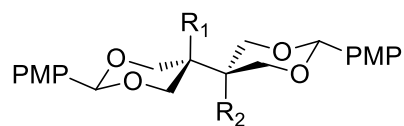

11 R<sub>1</sub>=Me, R<sub>2</sub>=H

<sup>1</sup>H NMR and <sup>13</sup>C NMR of **11**

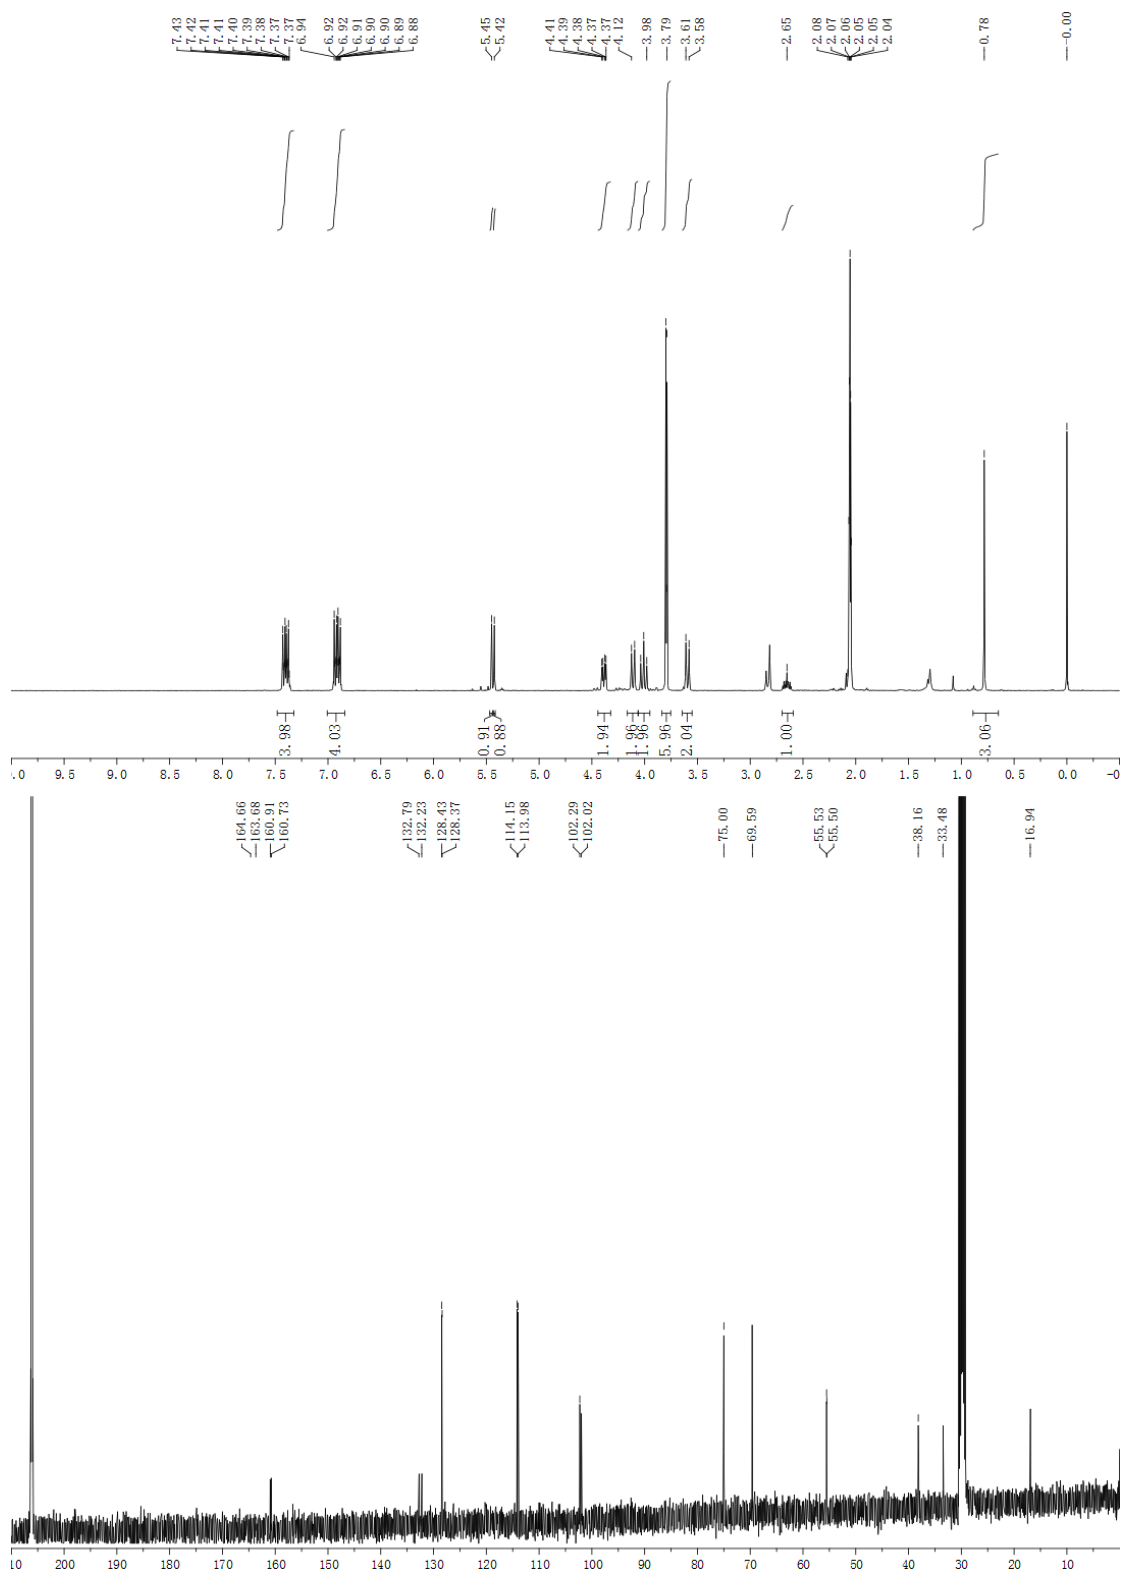





1m  $R_1=i\text{Pr}$ ,  $R_2=\text{H}$

$^1\text{H}$  NMR and  $^{13}\text{C}$  NMR of **1m**

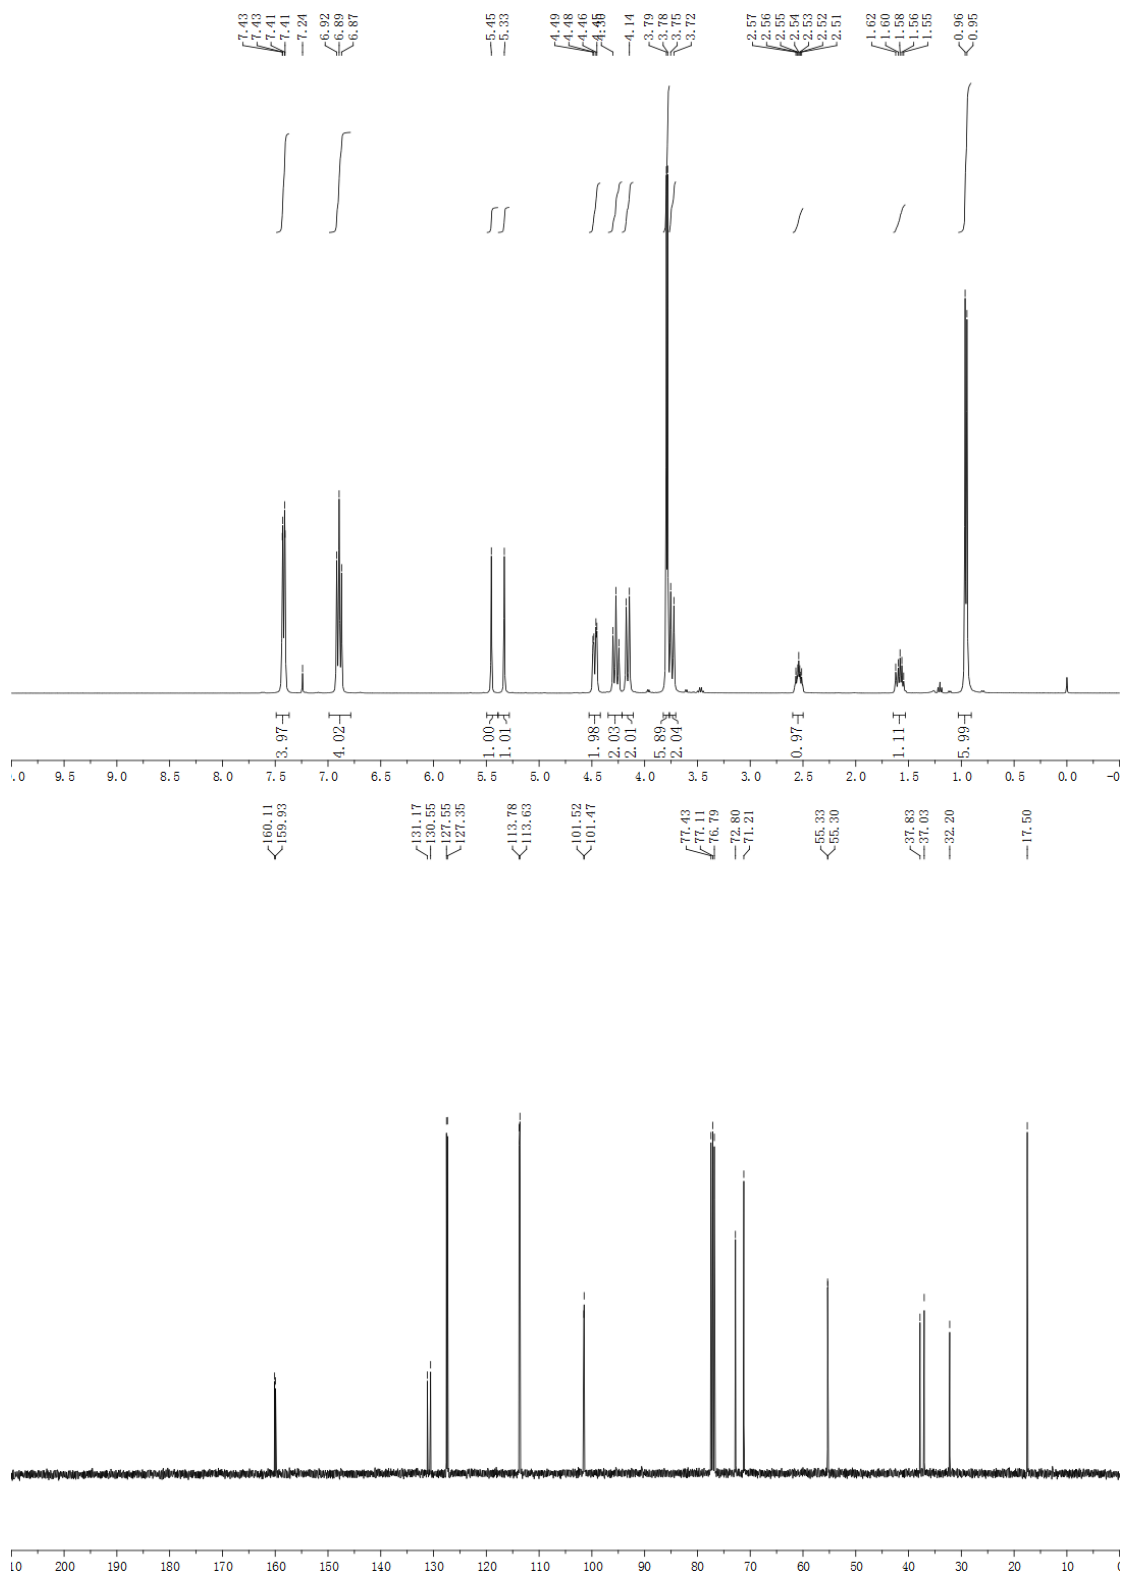



1n  $R_1=Bn$ ,  $R_2=H$

$^1H$  NMR and  $^{13}C$  NMR of **1n**

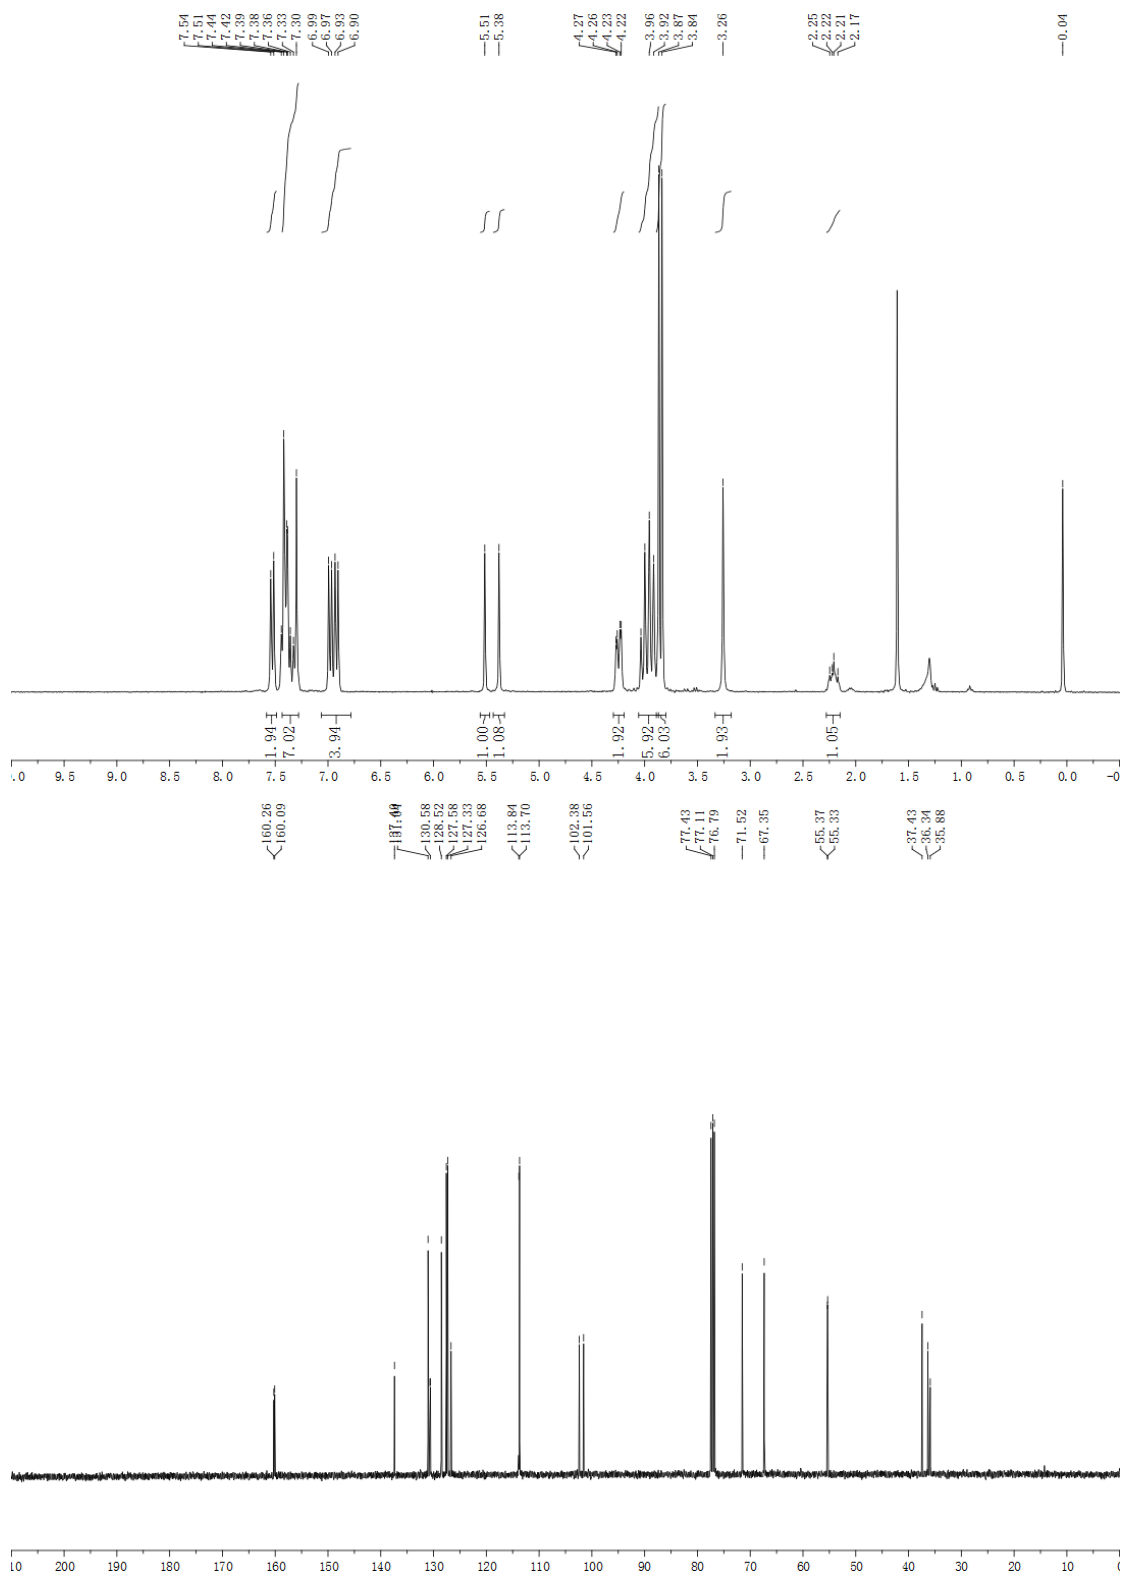

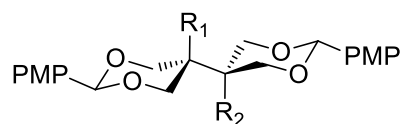

1o R<sub>1</sub>=ph, R<sub>2</sub>=H

<sup>1</sup>H NMR and <sup>13</sup>C NMR of **1o**

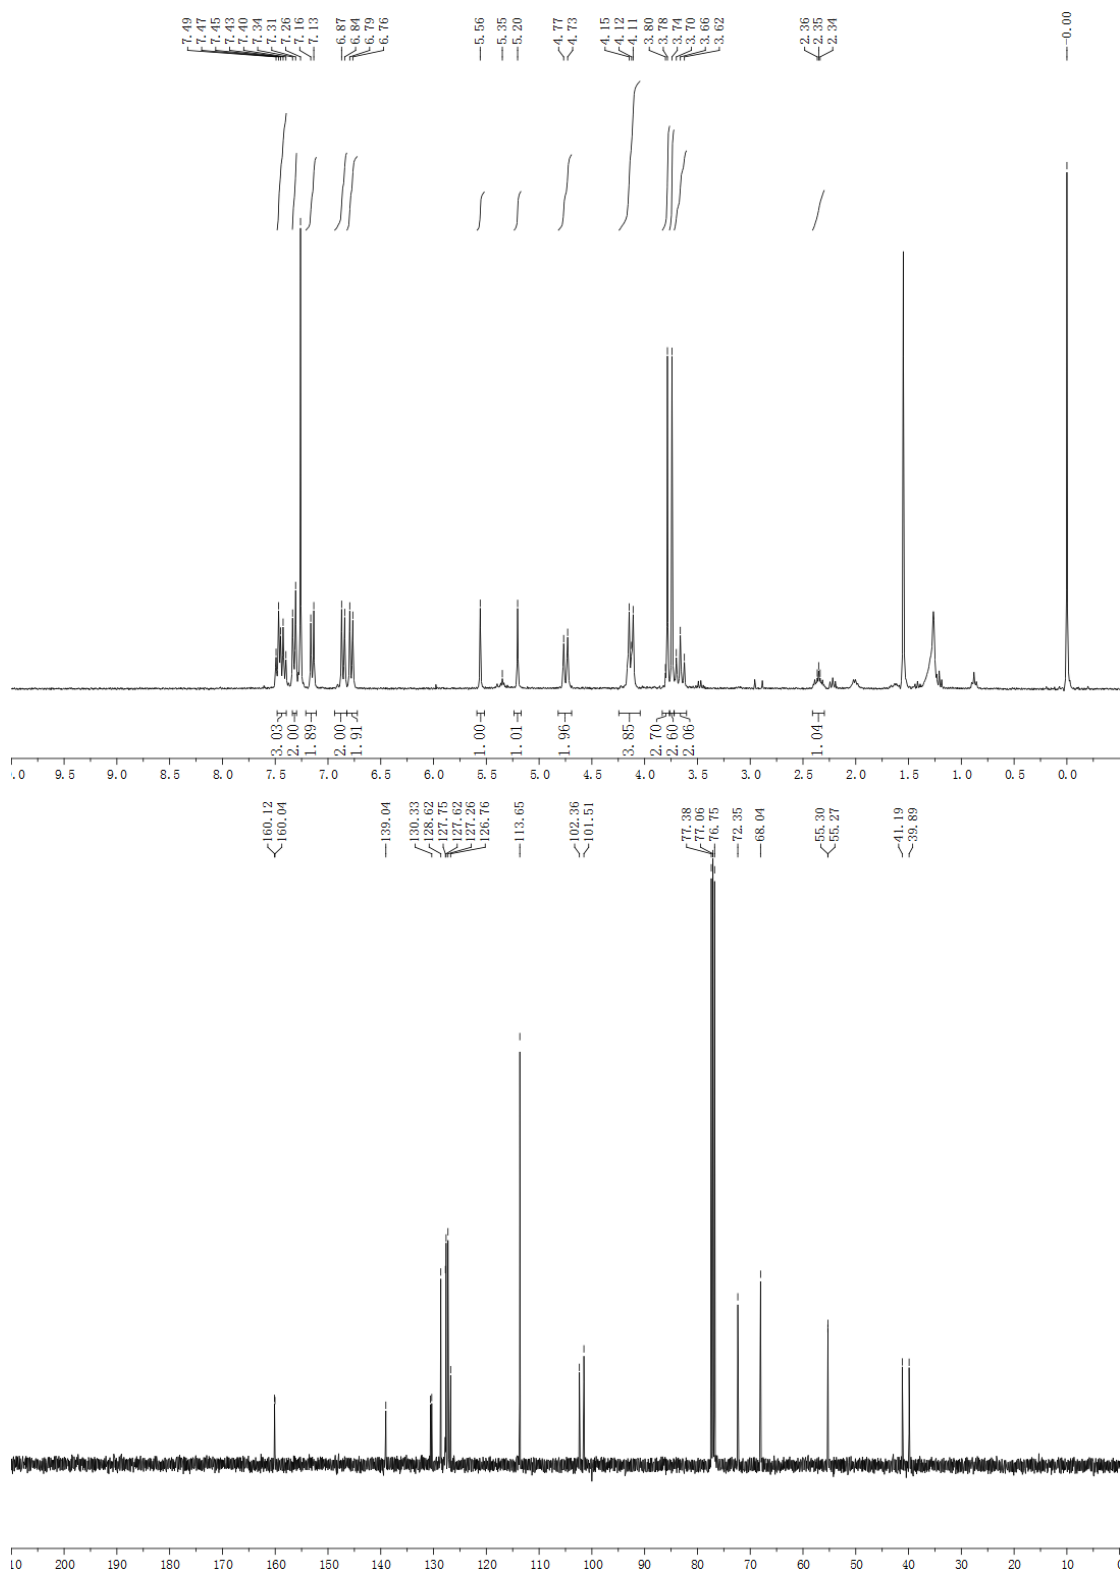

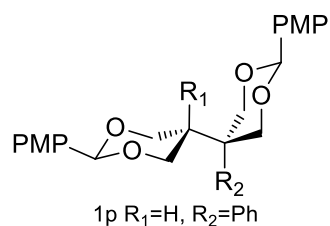

<sup>1</sup>H NMR and <sup>13</sup>C NMR of **1p**

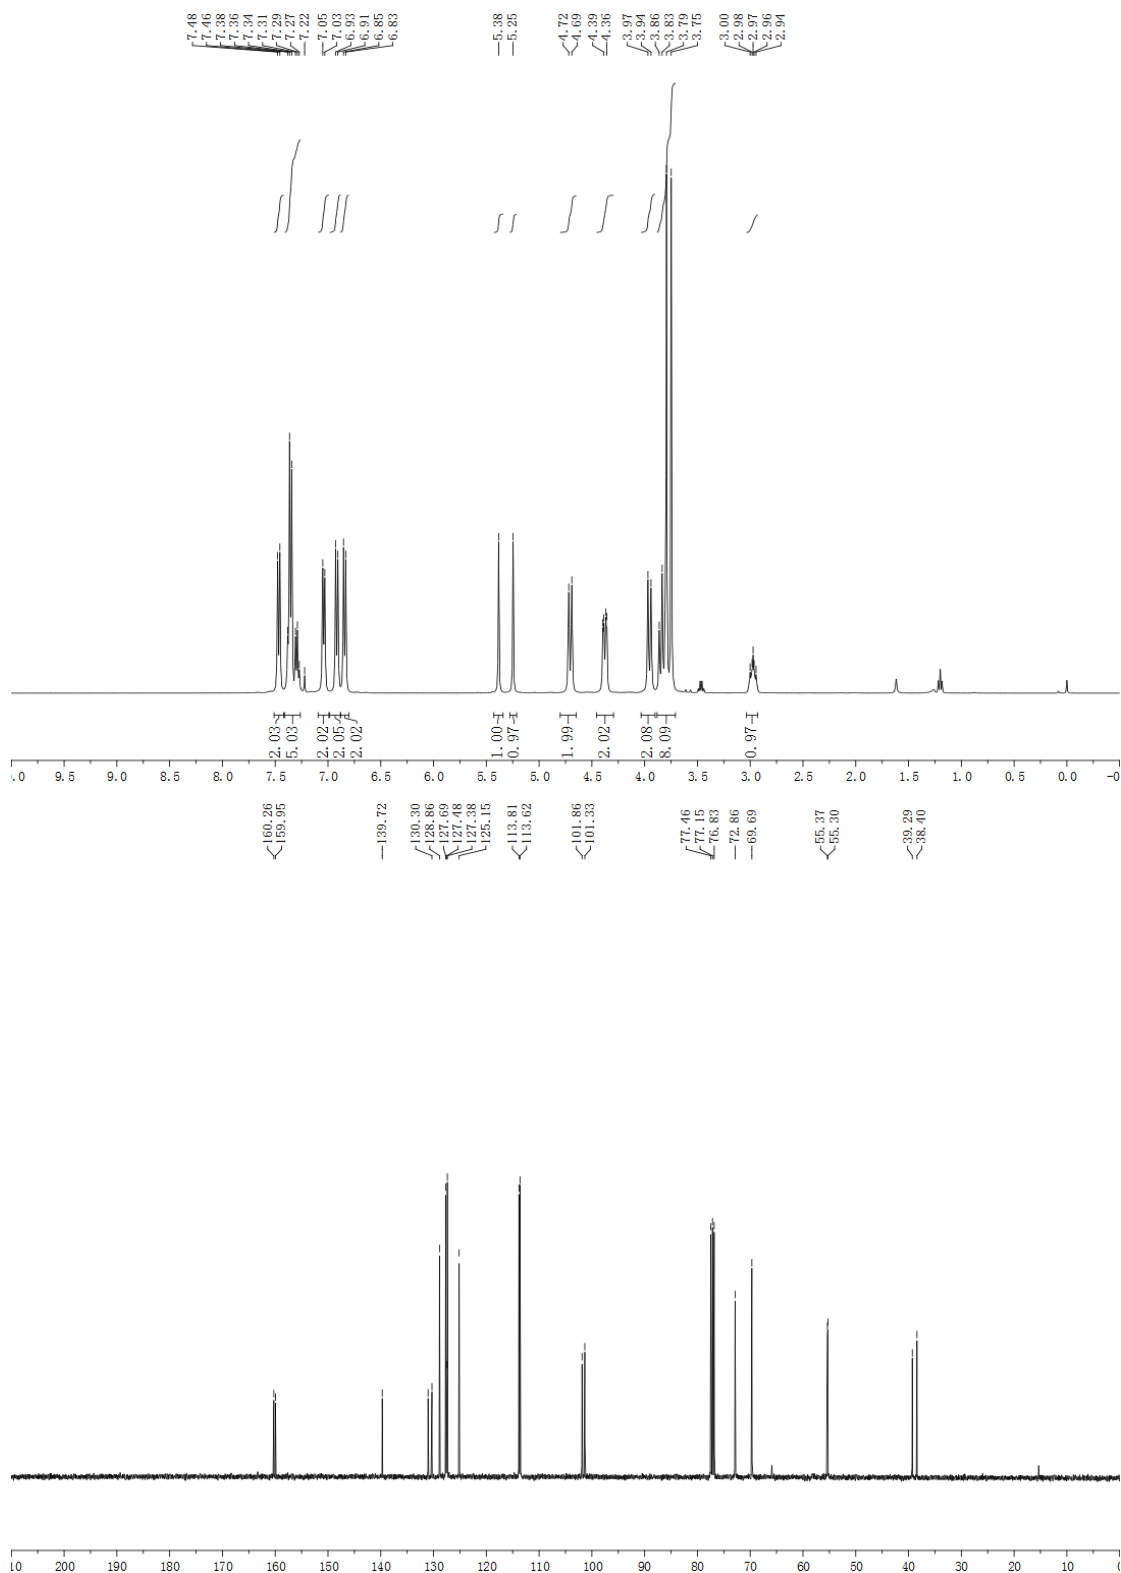

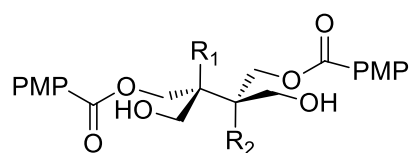

2a  $R_1=R_2=Ph$

$^1H$  NMR and  $^{13}C$  NMR of **2a**

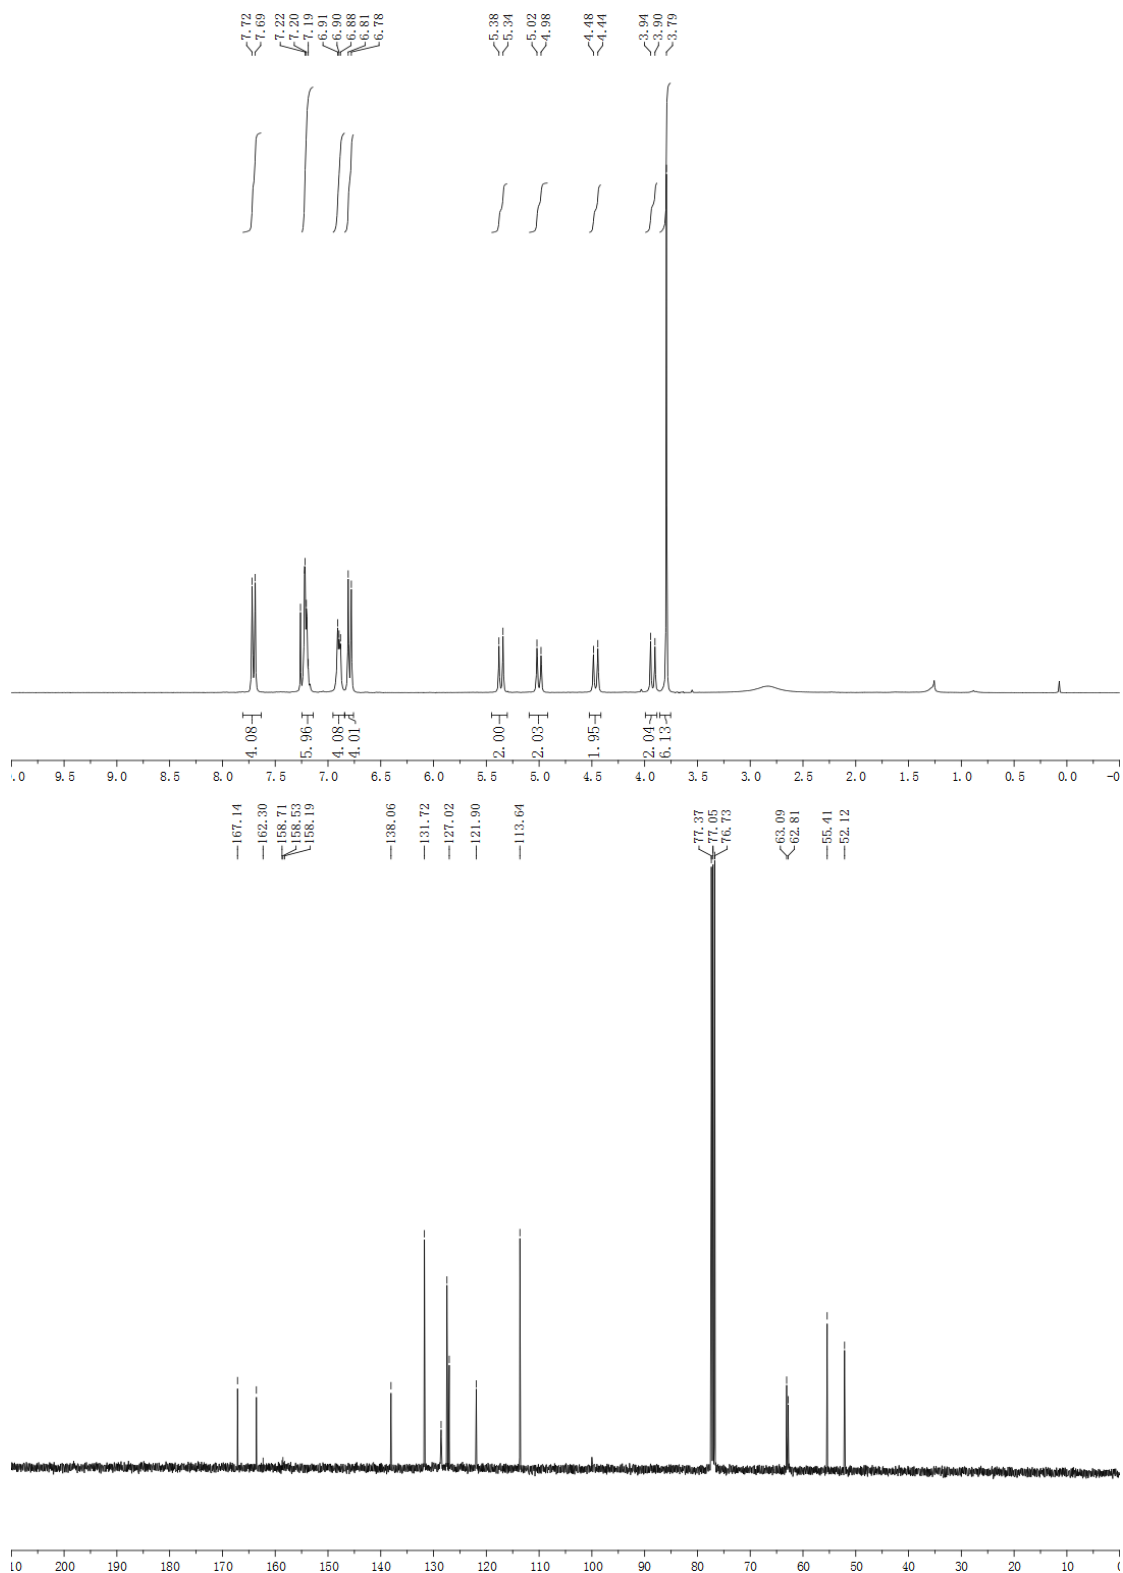

# HPLC of 2a

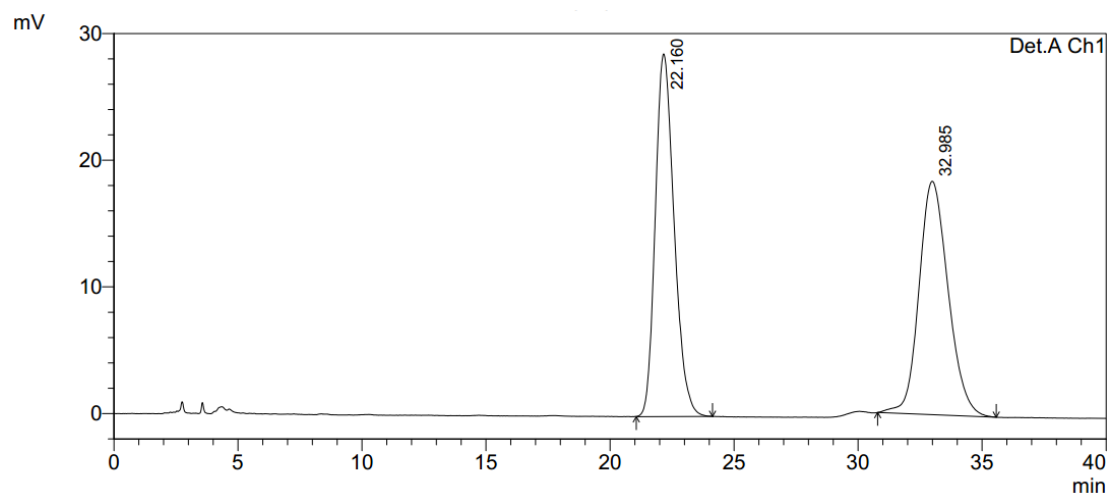

Detector A Ch1 254nm

| Peak# | Ret. Time | Area    | Height | Area %  | Height % |
|-------|-----------|---------|--------|---------|----------|
| 1     | 22.160    | 1508939 | 28629  | 50.087  | 60.848   |
| 2     | 32.985    | 1503690 | 18421  | 49.913  | 39.152   |
| Total |           | 3012630 | 47050  | 100.000 | 100.000  |

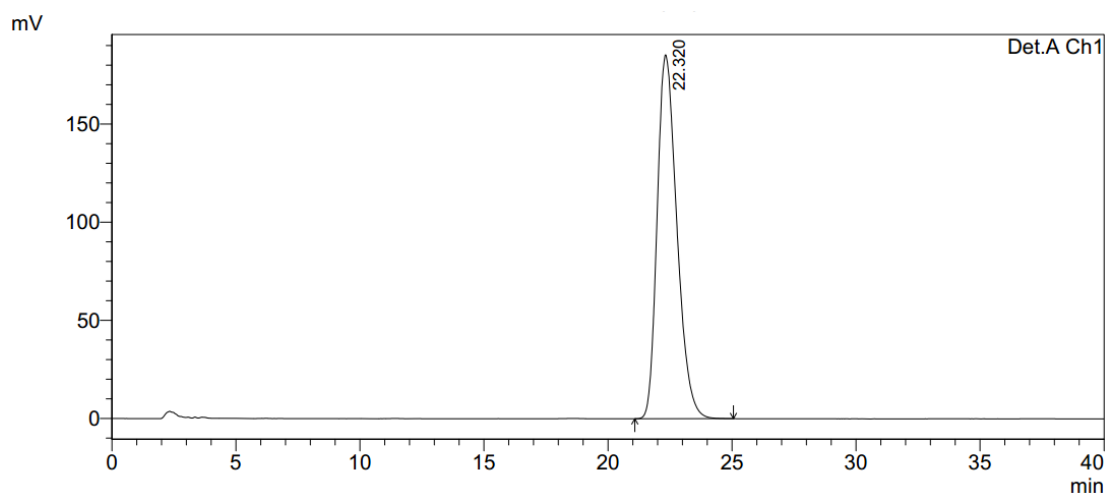

Detector A Ch1 254nm

| Peak# | Ret. Time | Area     | Height | Area %  | Height % |
|-------|-----------|----------|--------|---------|----------|
| 1     | 22.320    | 10242487 | 185419 | 100.000 | 100.000  |
| Total |           | 10242487 | 185419 | 100.000 | 100.000  |

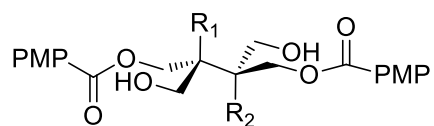

$R_1=R_2=Ph$   
the isomer of **2a**

$^1H$  NMR and  $^{13}C$  NMR of the isomer of **2a**

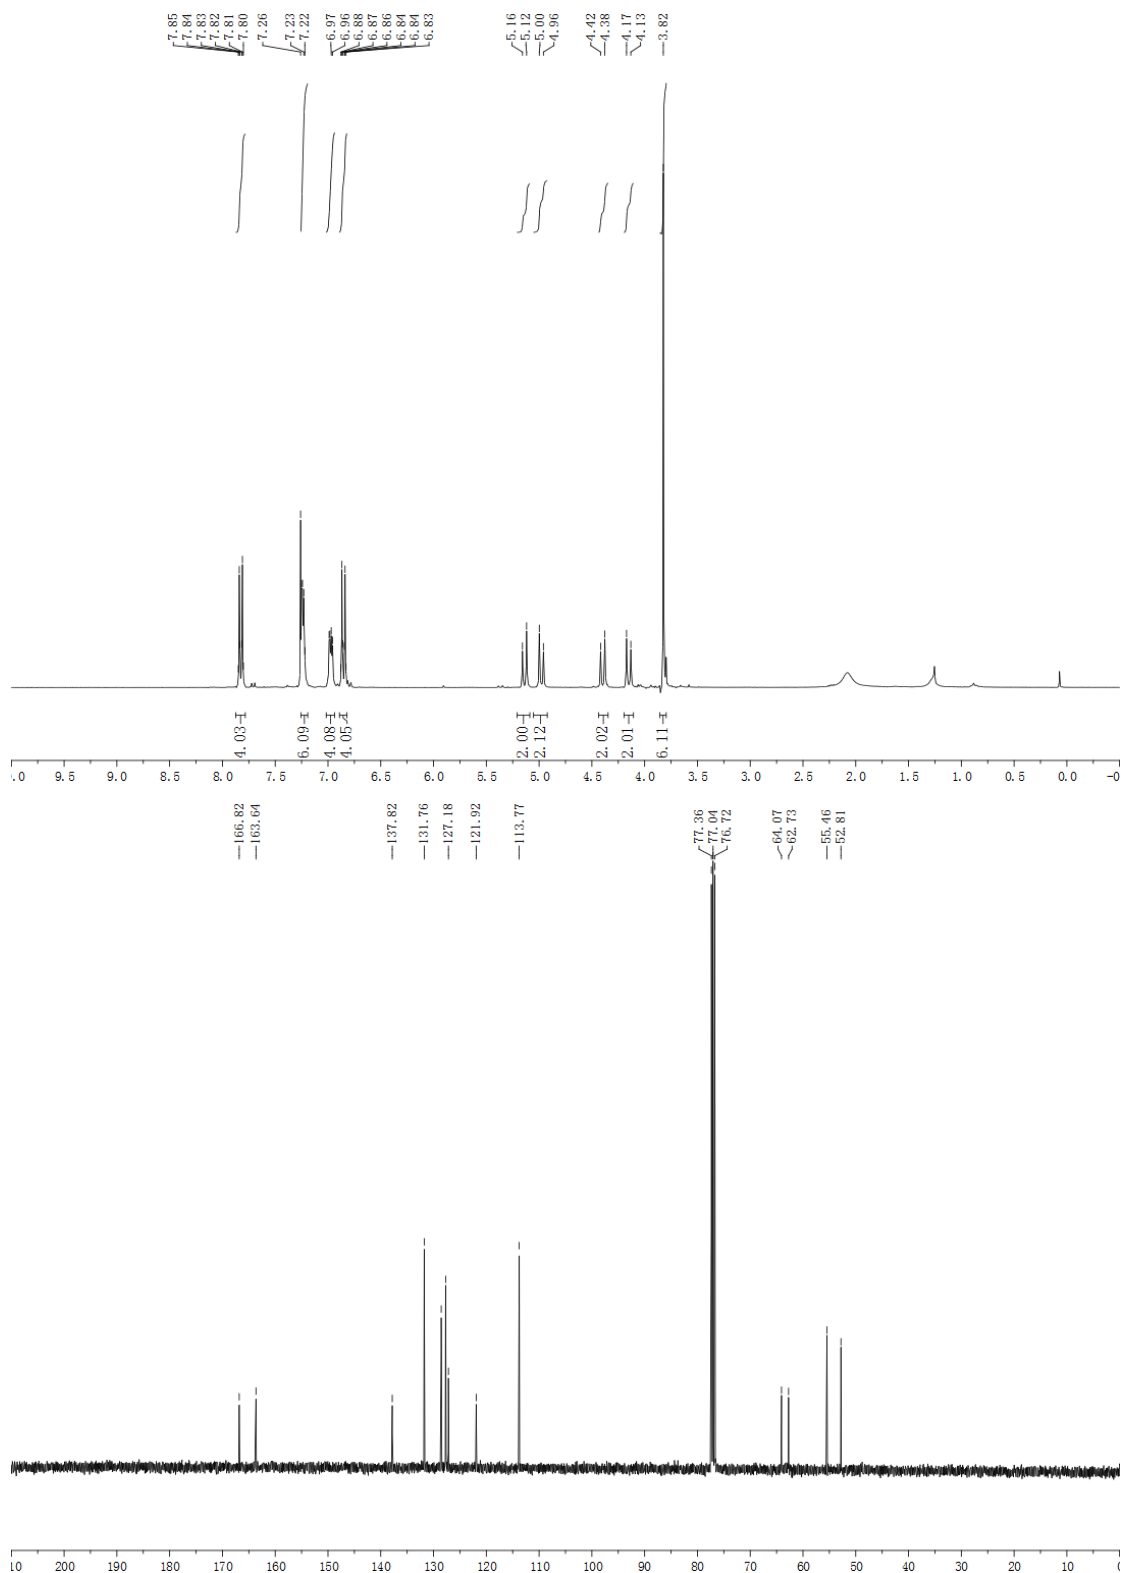

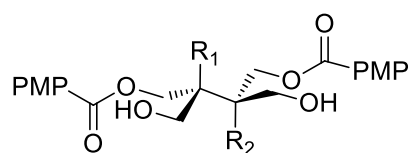

2b  $R_1=R_2=p\text{-OMe-Ph}$

$^1\text{H}$  NMR and  $^{13}\text{C}$  NMR of **2b**

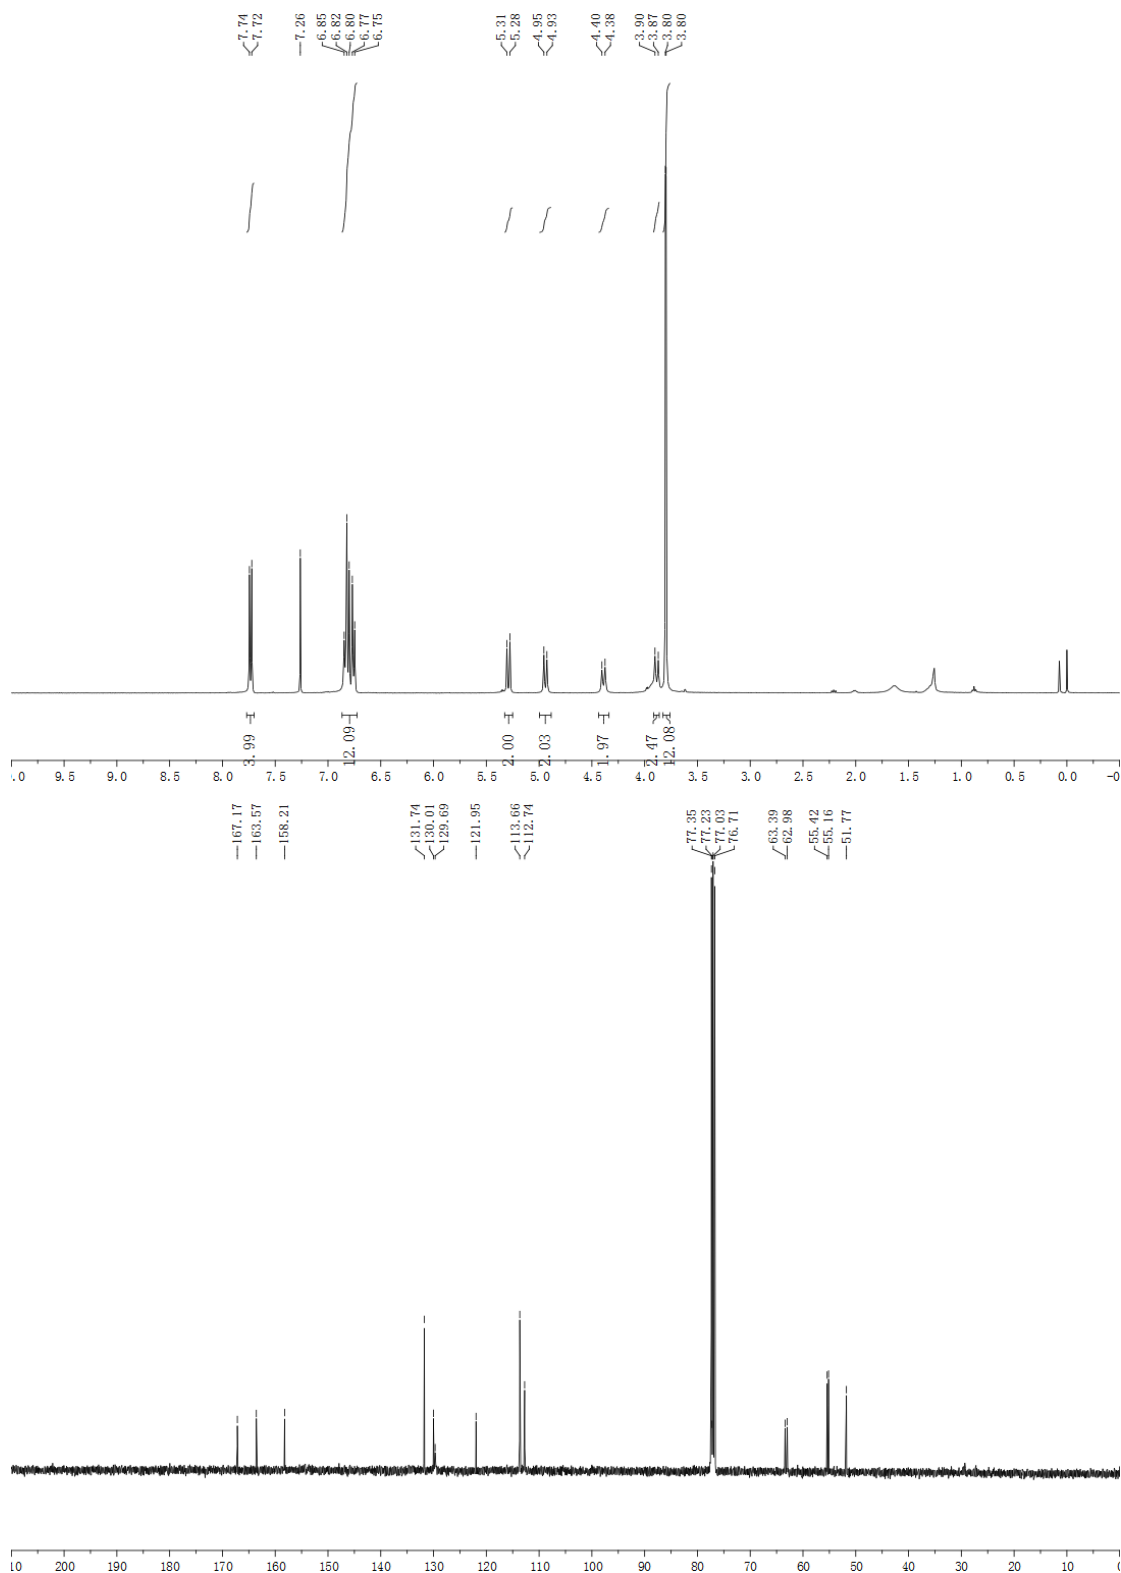



# HPLC of 2b

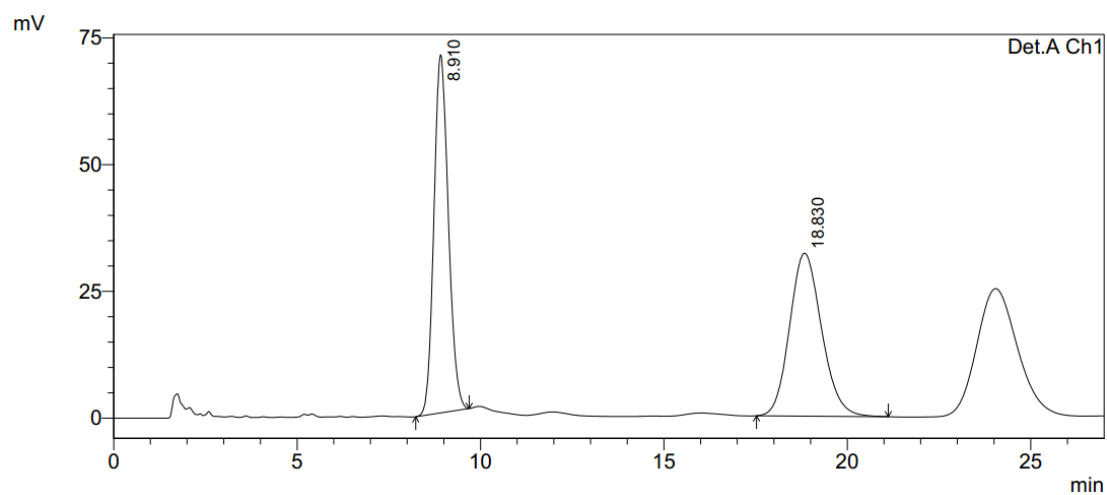

| Peak# | Ret. Time | Area    | Height | Area %  | Height % |
|-------|-----------|---------|--------|---------|----------|
| 1     | 8.910     | 1937837 | 70649  | 49.856  | 68.724   |
| 2     | 18.830    | 1949016 | 32151  | 50.144  | 31.276   |
| Total |           | 3886854 | 102800 | 100.000 | 100.000  |

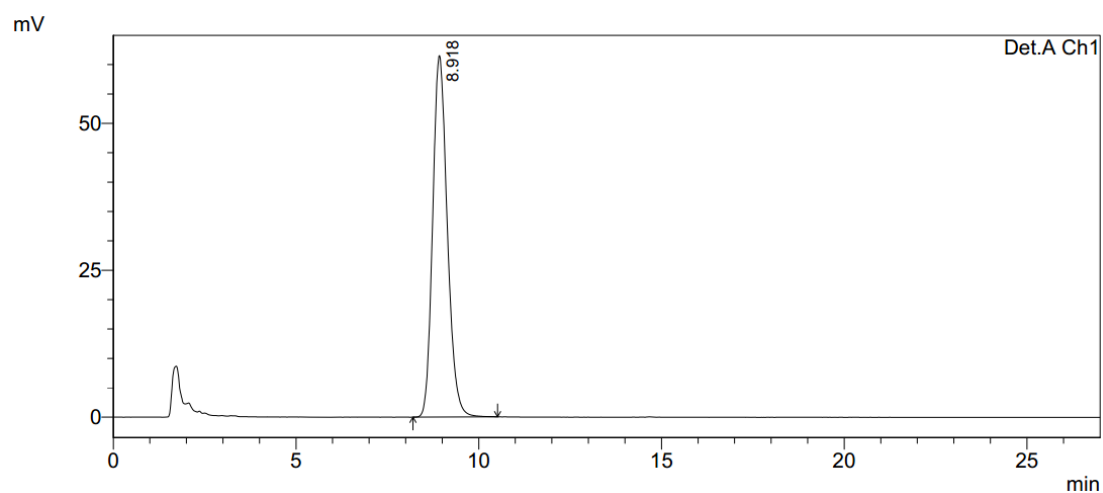

## Detector A Ch1 254nm

| Peak# | Ret. Time | Area    | Height | Area %  | Height % |
|-------|-----------|---------|--------|---------|----------|
| 1     | 8.918     | 1710769 | 61522  | 100.000 | 100.000  |
| Total |           | 1710769 | 61522  | 100.000 | 100.000  |

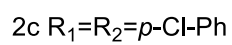

The figure displays two NMR spectra for compound 1. The top spectrum is the  $^1\text{H}$  NMR spectrum, recorded in  $\text{CDCl}_3$ , showing chemical shifts from 0.0 to 10.0 ppm. The bottom spectrum is the  $^{13}\text{C}$  NMR spectrum, also in  $\text{CDCl}_3$ , showing chemical shifts from 10 to 170 ppm. Both spectra include peak assignments and integration values.

**$^1\text{H}$  NMR Data:**

| Chemical Shift (ppm) | Integration |
|----------------------|-------------|
| 7.69, 7.67           | 4.08        |
| 7.22, 7.21           | 3.93        |
| 6.88, 6.81, 6.79     | 3.88, 4.10  |
| 5.37, 5.35           | 2.00        |
| 5.08, 5.05           | 1.97        |
| 4.31, 4.28           | 2.02        |
| 3.80, 3.76           | 8.05        |

**$^{13}\text{C}$  NMR Data:**

| Chemical Shift (ppm)                           |
|------------------------------------------------|
| 167.13, 163.74                                 |
| 136.45, 133.17, 131.73, 130.01, 127.71, 121.55 |
| 113.74                                         |
| 77.34, 77.02, 76.70 (solvent)                  |
| 62.96, 62.50                                   |
| 55.43, 52.12                                   |

# HPLC of 2c

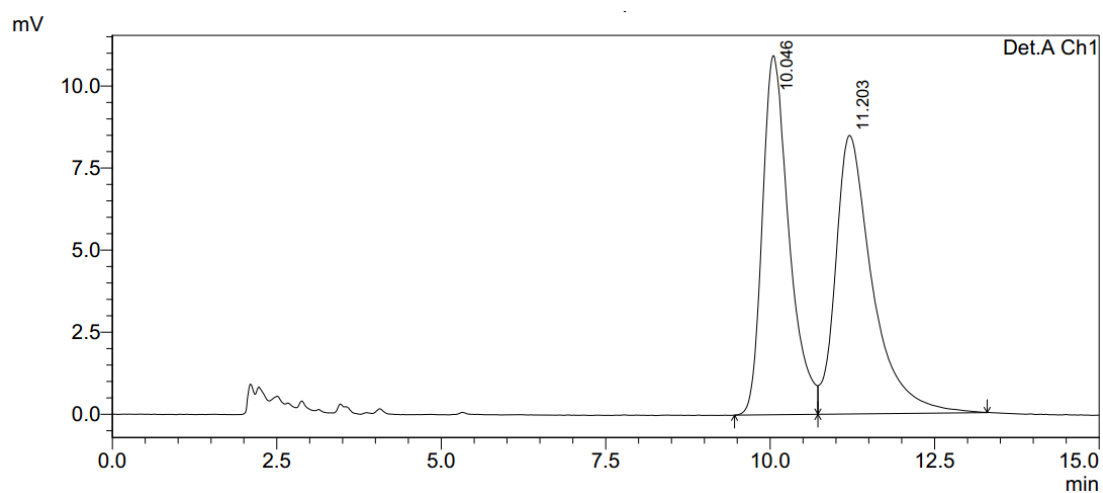

Detector A Ch1 254nm

| Peak# | Ret. Time | Area   | Height | Area %  | Height % |
|-------|-----------|--------|--------|---------|----------|
| 1     | 10.046    | 308718 | 10943  | 48.342  | 56.311   |
| 2     | 11.203    | 329892 | 8490   | 51.658  | 43.689   |
| Total |           | 638610 | 19434  | 100.000 | 100.000  |

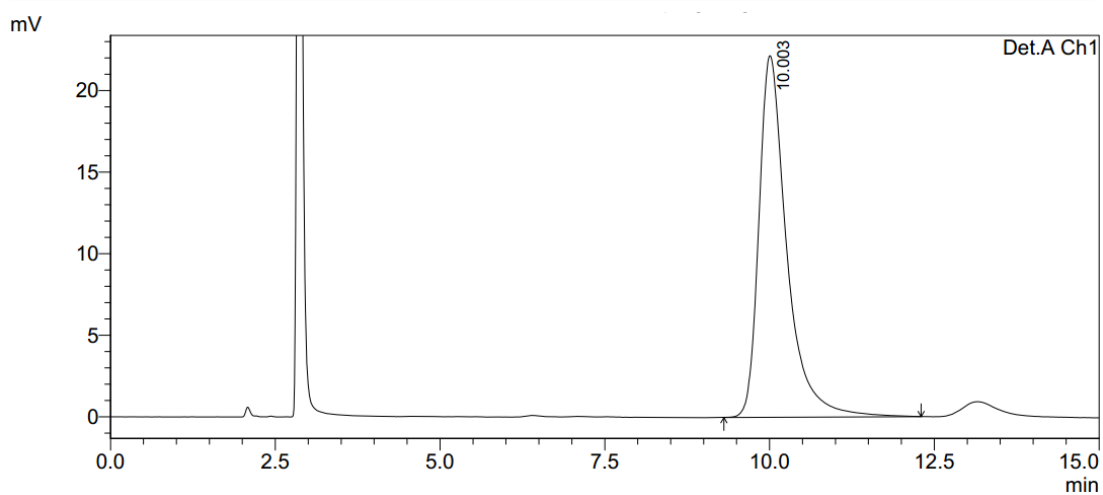

Detector A Ch1 254nm

| Peak# | Ret. Time | Area   | Height | Area %  | Height % |
|-------|-----------|--------|--------|---------|----------|
| 1     | 10.003    | 653293 | 22172  | 100.000 | 100.000  |
| Total |           | 653293 | 22172  | 100.000 | 100.000  |



2d  $R_1=R_2=p\text{-Me-Ph}$

$^1\text{H}$  NMR and  $^{13}\text{C}$  NMR of **2d**

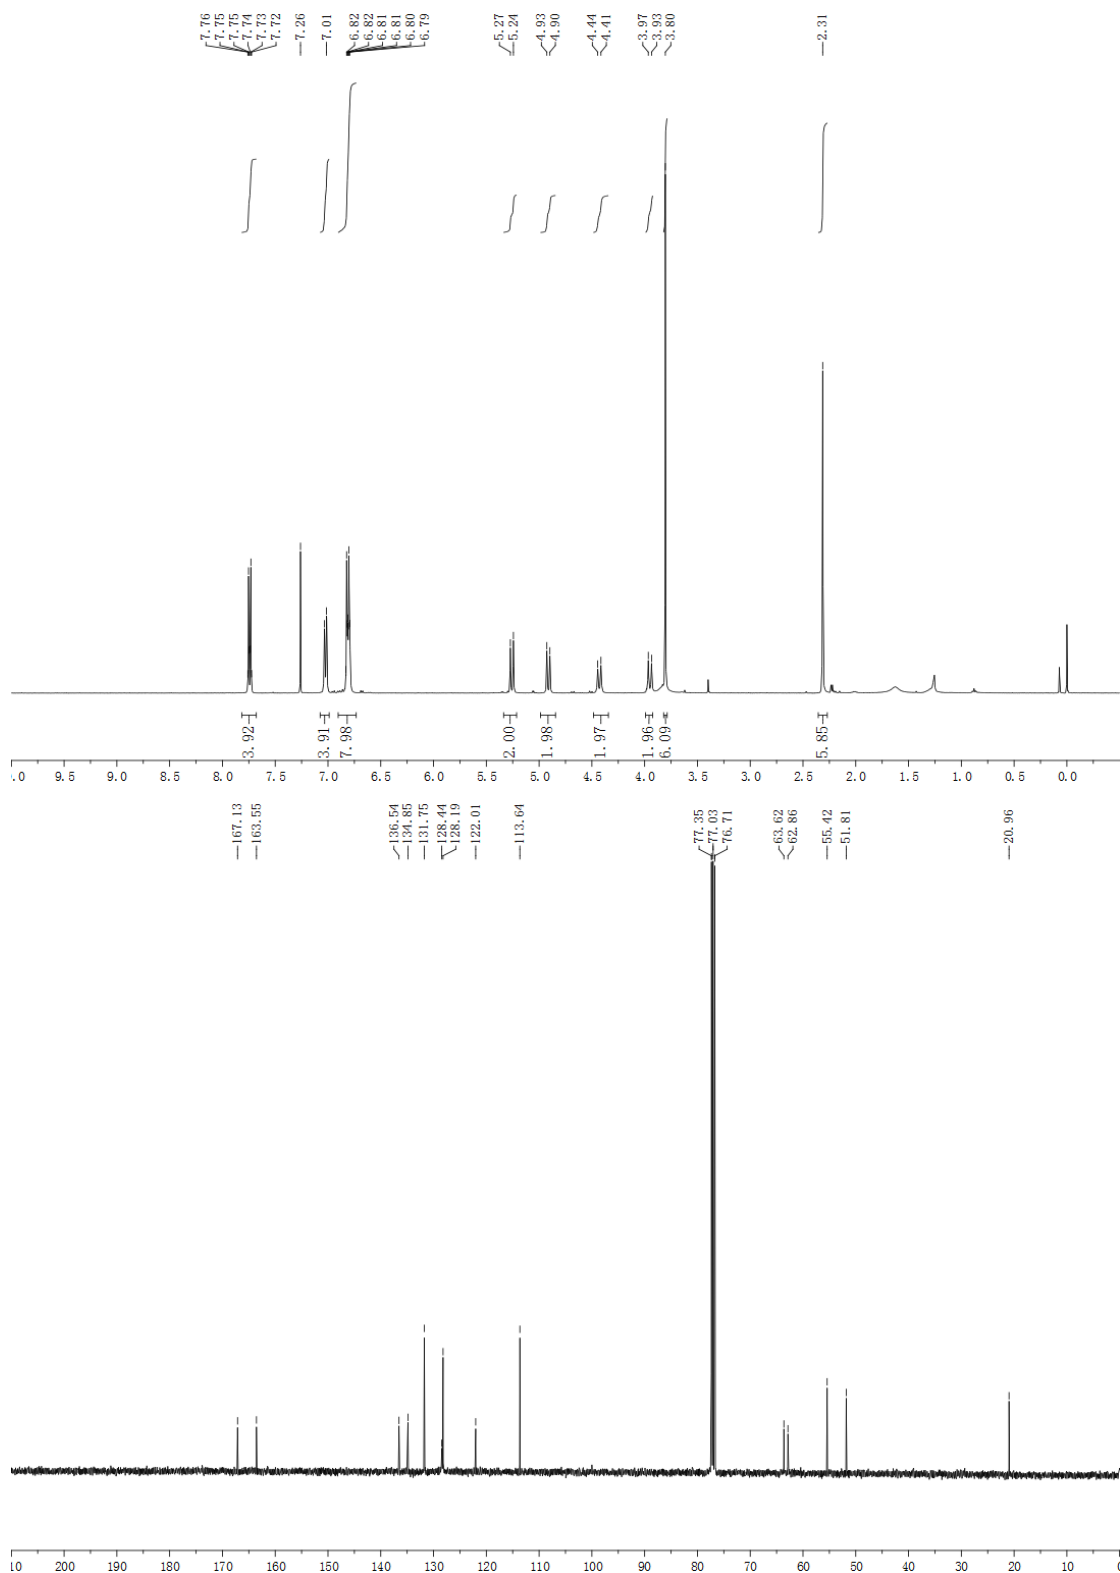

# HPLC of **2d**

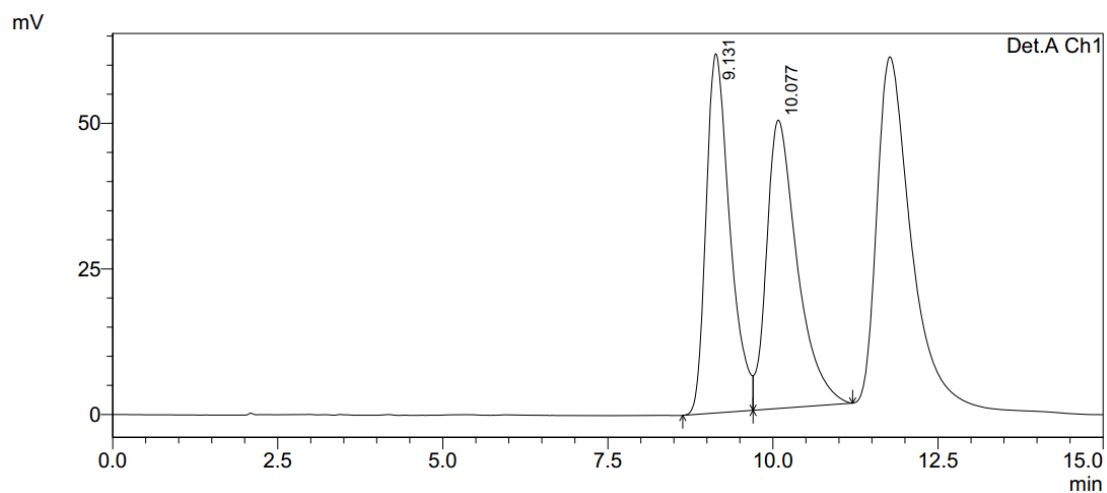

Detector A Ch1 254nm

| Peak# | Ret. Time | Area    | Height | Area %  | Height % |
|-------|-----------|---------|--------|---------|----------|
| 1     | 9.131     | 1555772 | 61698  | 49.234  | 55.475   |
| 2     | 10.077    | 1604208 | 49520  | 50.766  | 44.525   |
| Total |           | 3159980 | 111218 | 100.000 | 100.000  |

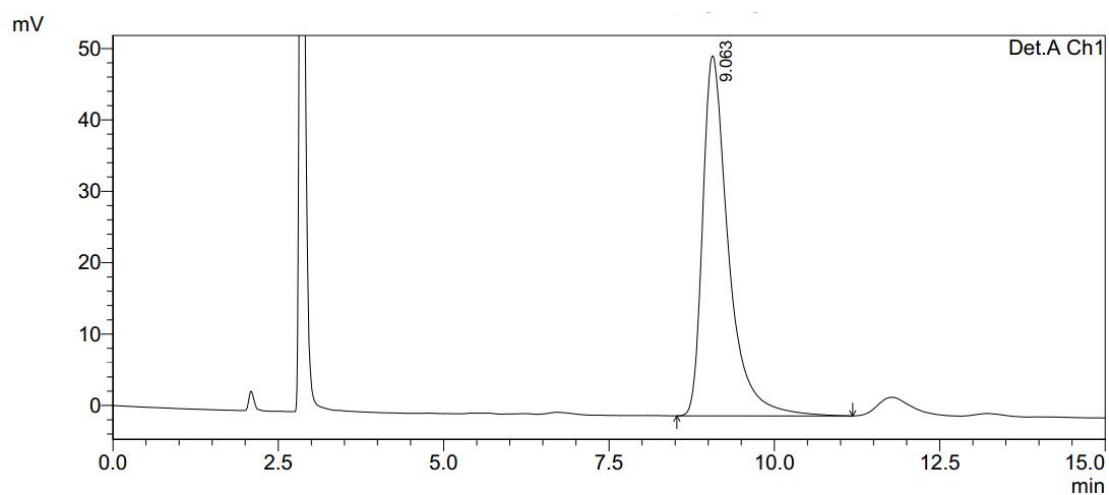

Detector A Ch1 254nm

| Peak# | Ret. Time | Area    | Height | Area %  | Height % |
|-------|-----------|---------|--------|---------|----------|
| 1     | 9.063     | 1367793 | 50444  | 100.000 | 100.000  |
| Total |           | 1367793 | 50444  | 100.000 | 100.000  |



2e  $R_1=R_2=m\text{-CF}_3\text{-Ph}$

$^1\text{H}$  NMR and  $^{13}\text{C}$  NMR of **2e**

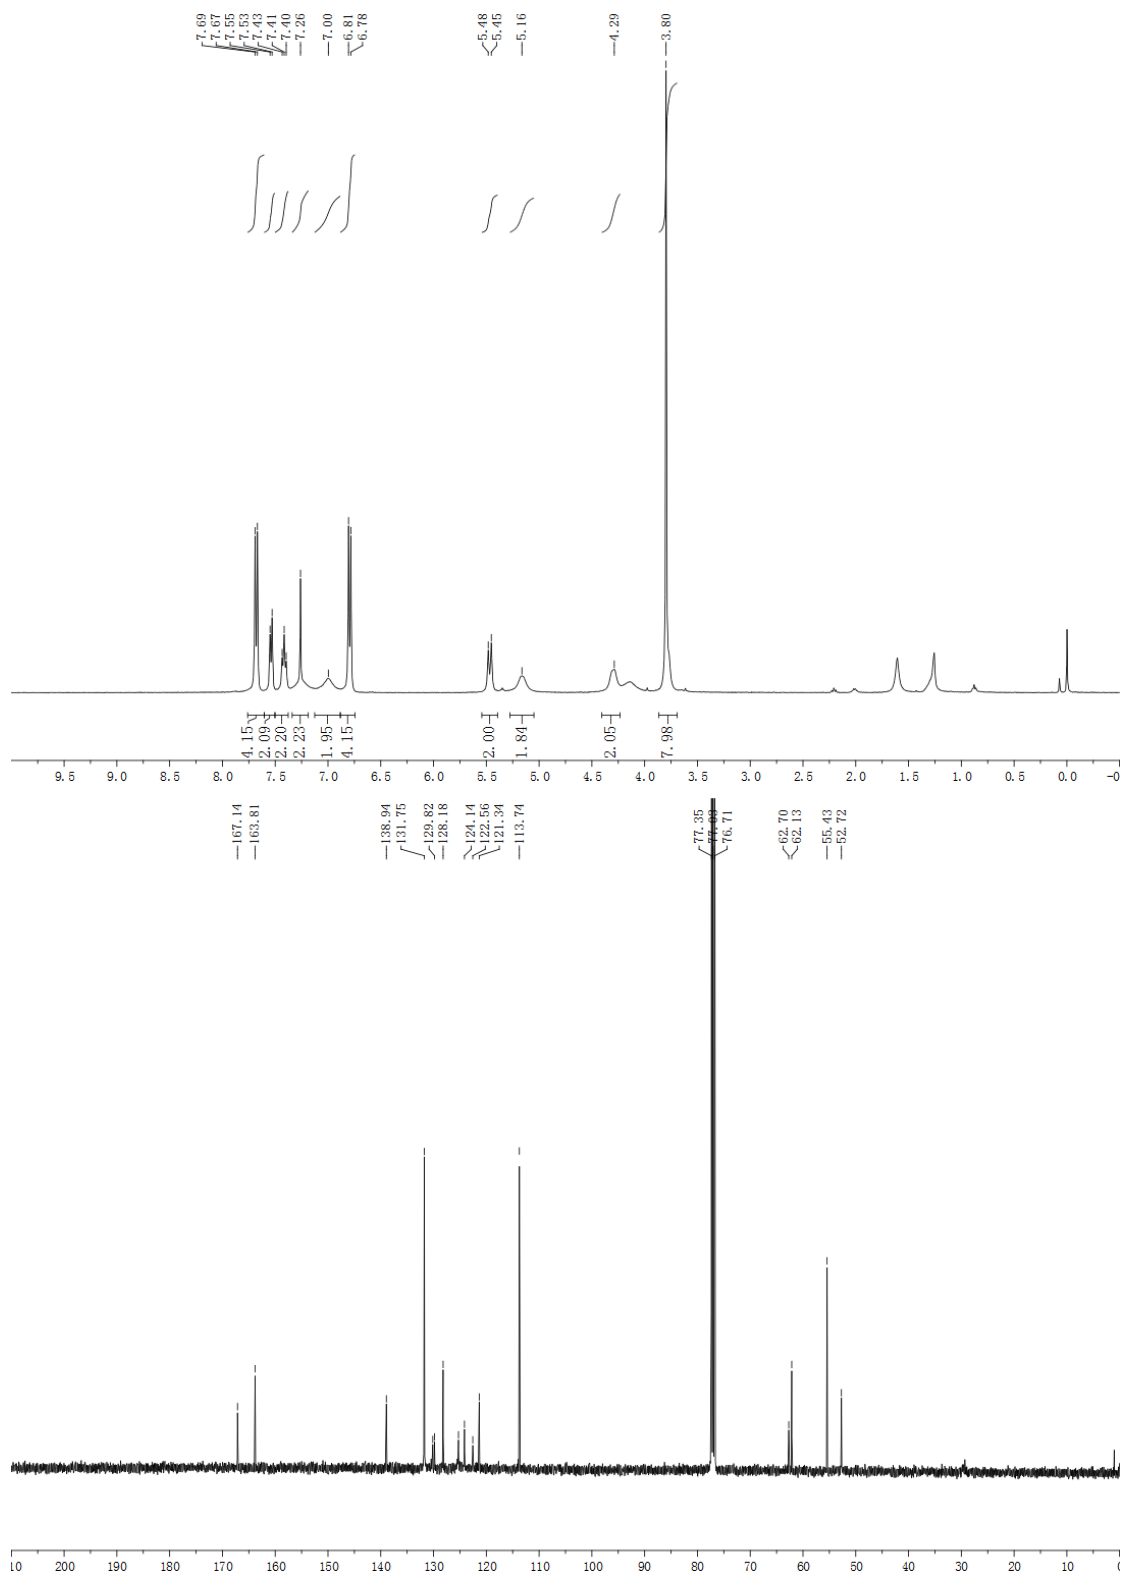

$^{19}\text{F}$  NMR of **2e**

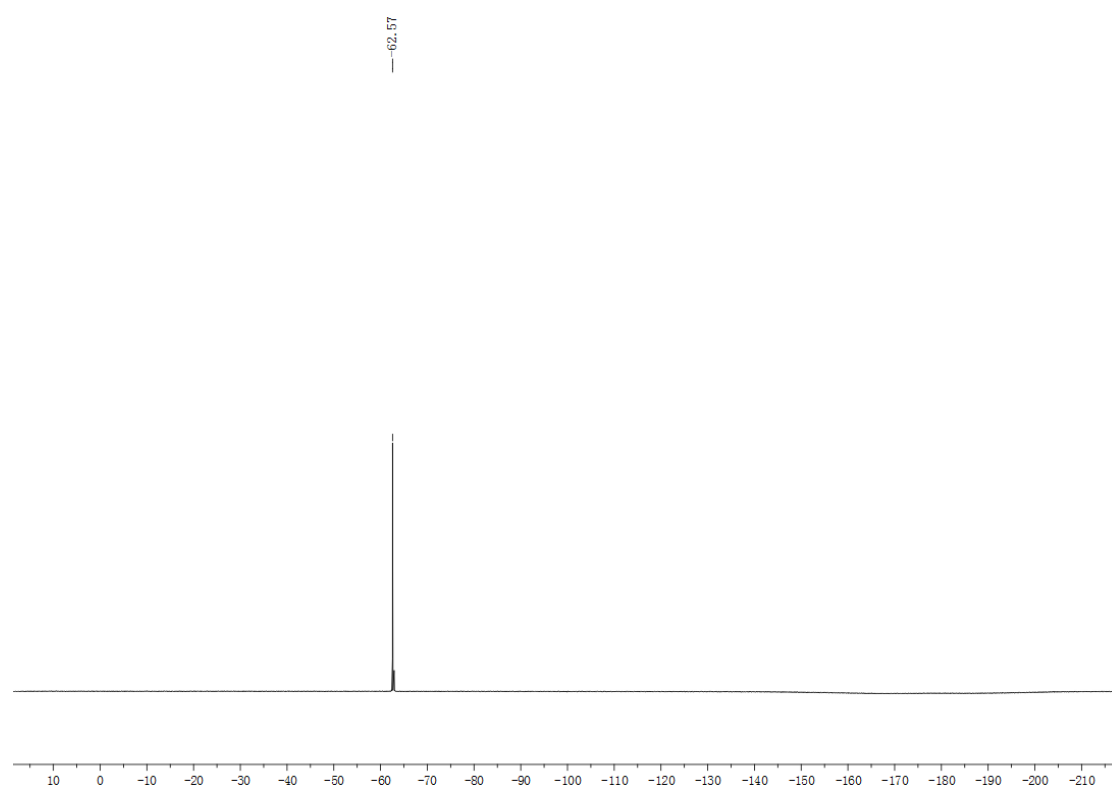

# HPLC of 2e

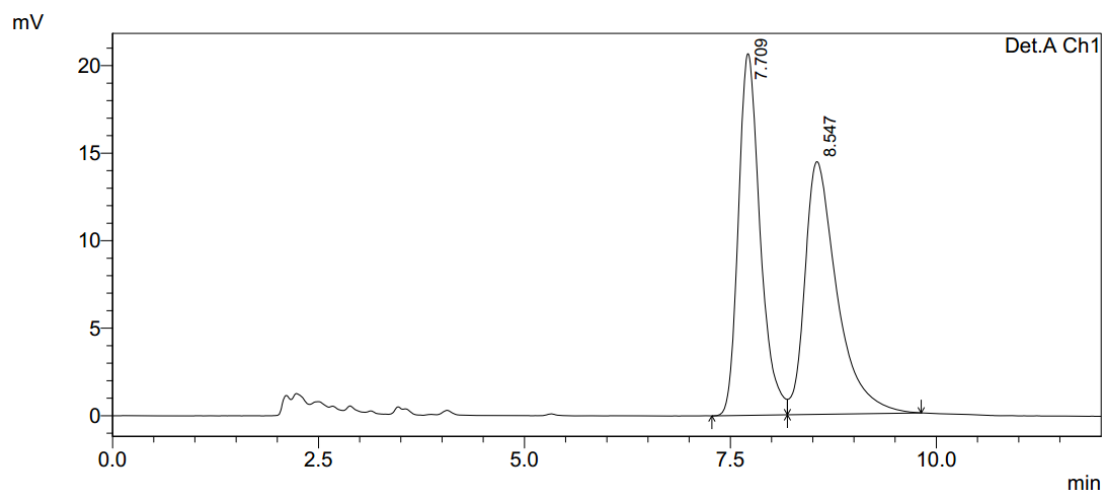

Detector A Ch1 254nm

| Peak# | Ret. Time | Area   | Height | Area %  | Height % |
|-------|-----------|--------|--------|---------|----------|
| 1     | 7.709     | 379685 | 20662  | 49.216  | 58.867   |
| 2     | 8.547     | 391787 | 14438  | 50.784  | 41.133   |
| Total |           | 771472 | 35100  | 100.000 | 100.000  |

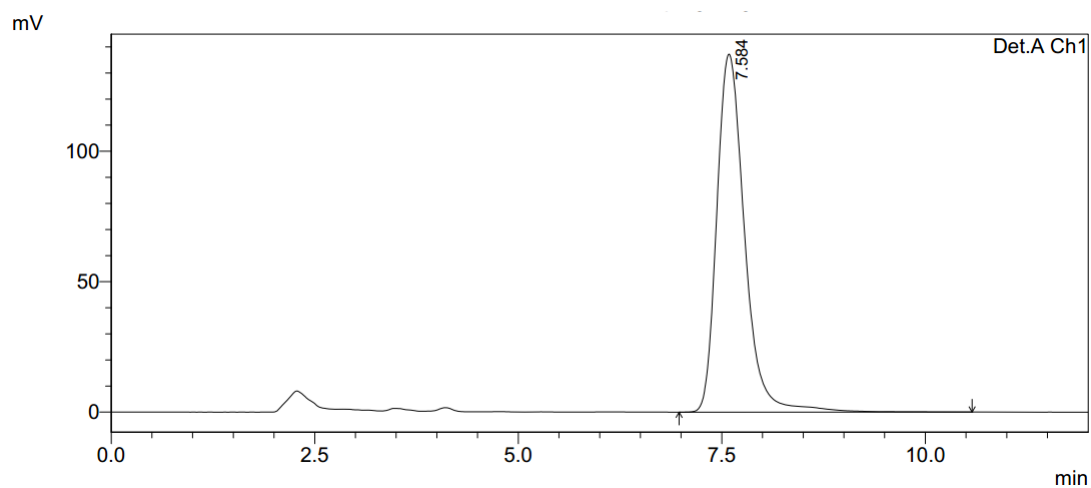

Detector A Ch1 254nm

| Peak# | Ret. Time | Area    | Height | Area %  | Height % |
|-------|-----------|---------|--------|---------|----------|
| 1     | 7.584     | 3261476 | 137252 | 100.000 | 100.000  |
| Total |           | 3261476 | 137252 | 100.000 | 100.000  |



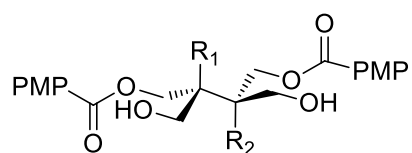

2f  $R_1=R_2=2\text{-Naphthyl}$

$^1\text{H}$  NMR and  $^{13}\text{C}$  NMR of **2f**

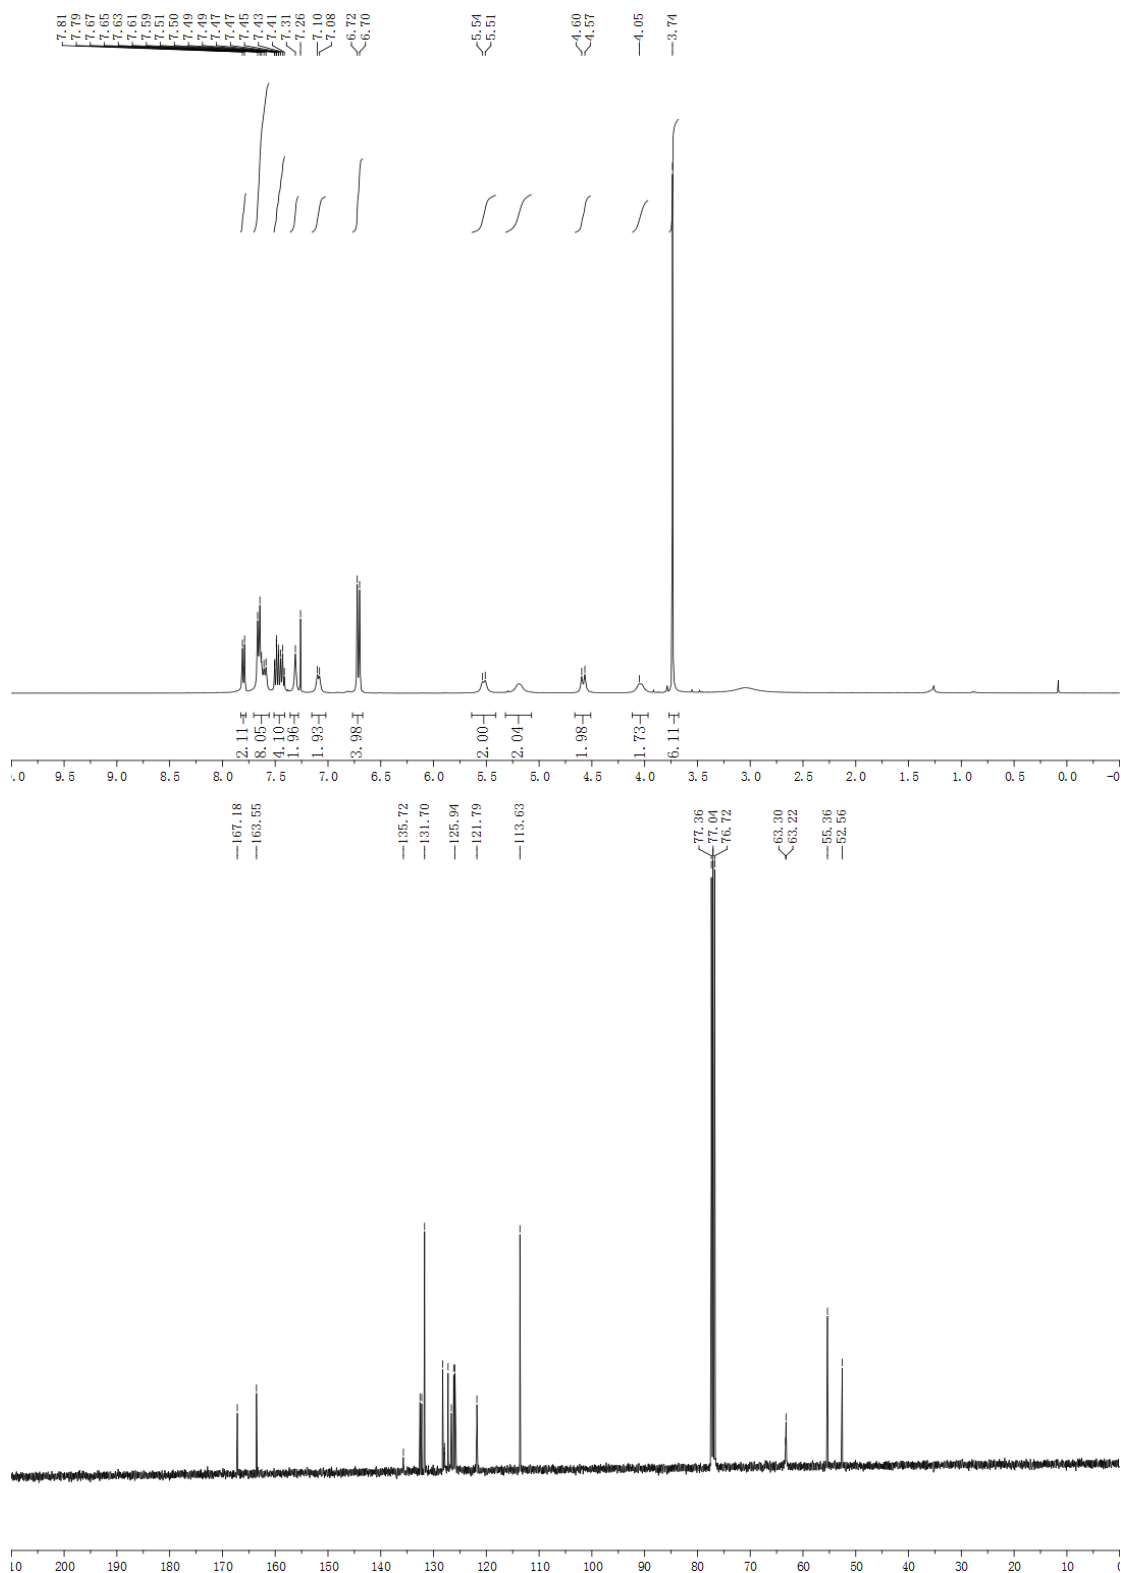

# HPLC of **2f**

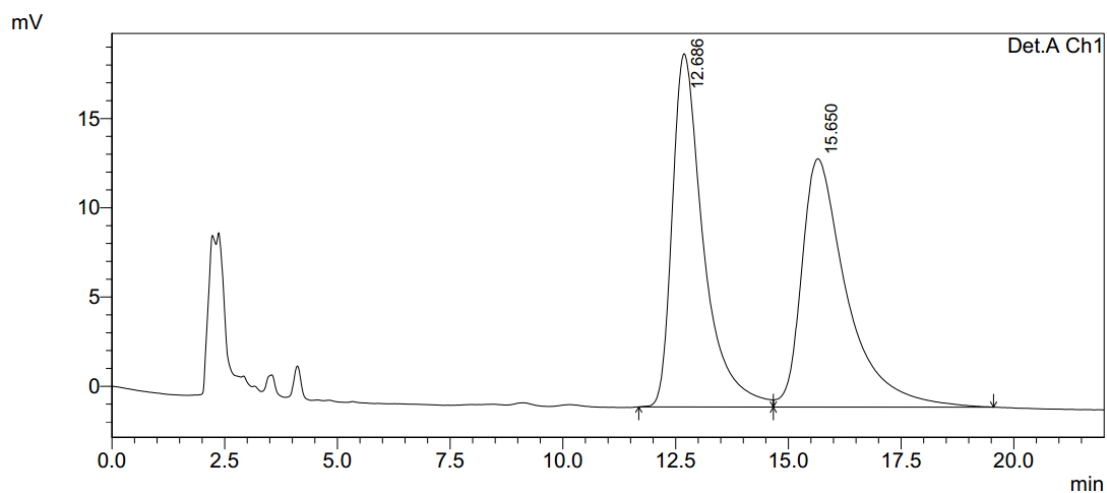

Detector A Ch1 254nm

| Peak# | Ret. Time | Area    | Height | Area %  | Height % |
|-------|-----------|---------|--------|---------|----------|
| 1     | 12.686    | 950209  | 19792  | 49.495  | 58.727   |
| 2     | 15.650    | 969611  | 13910  | 50.505  | 41.273   |
| Total |           | 1919820 | 33703  | 100.000 | 100.000  |

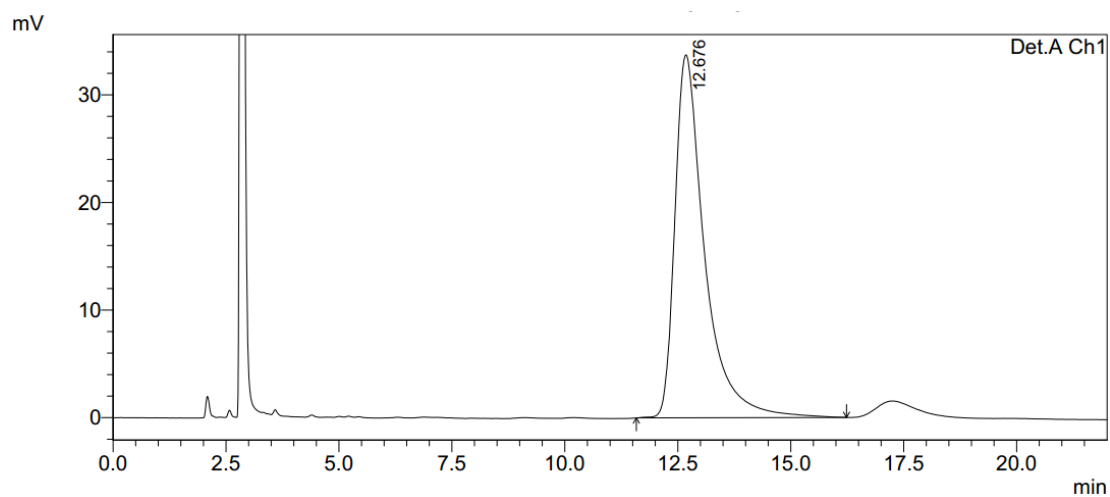

Detector A Ch1 254nm

| Peak# | Ret. Time | Area    | Height | Area %  | Height % |
|-------|-----------|---------|--------|---------|----------|
| 1     | 12.676    | 1542237 | 33727  | 100.000 | 100.000  |
| Total |           | 1542237 | 33727  | 100.000 | 100.000  |



2g R<sub>1</sub>=R<sub>2</sub>=Me

<sup>1</sup>H NMR and <sup>13</sup>C NMR of **2g**

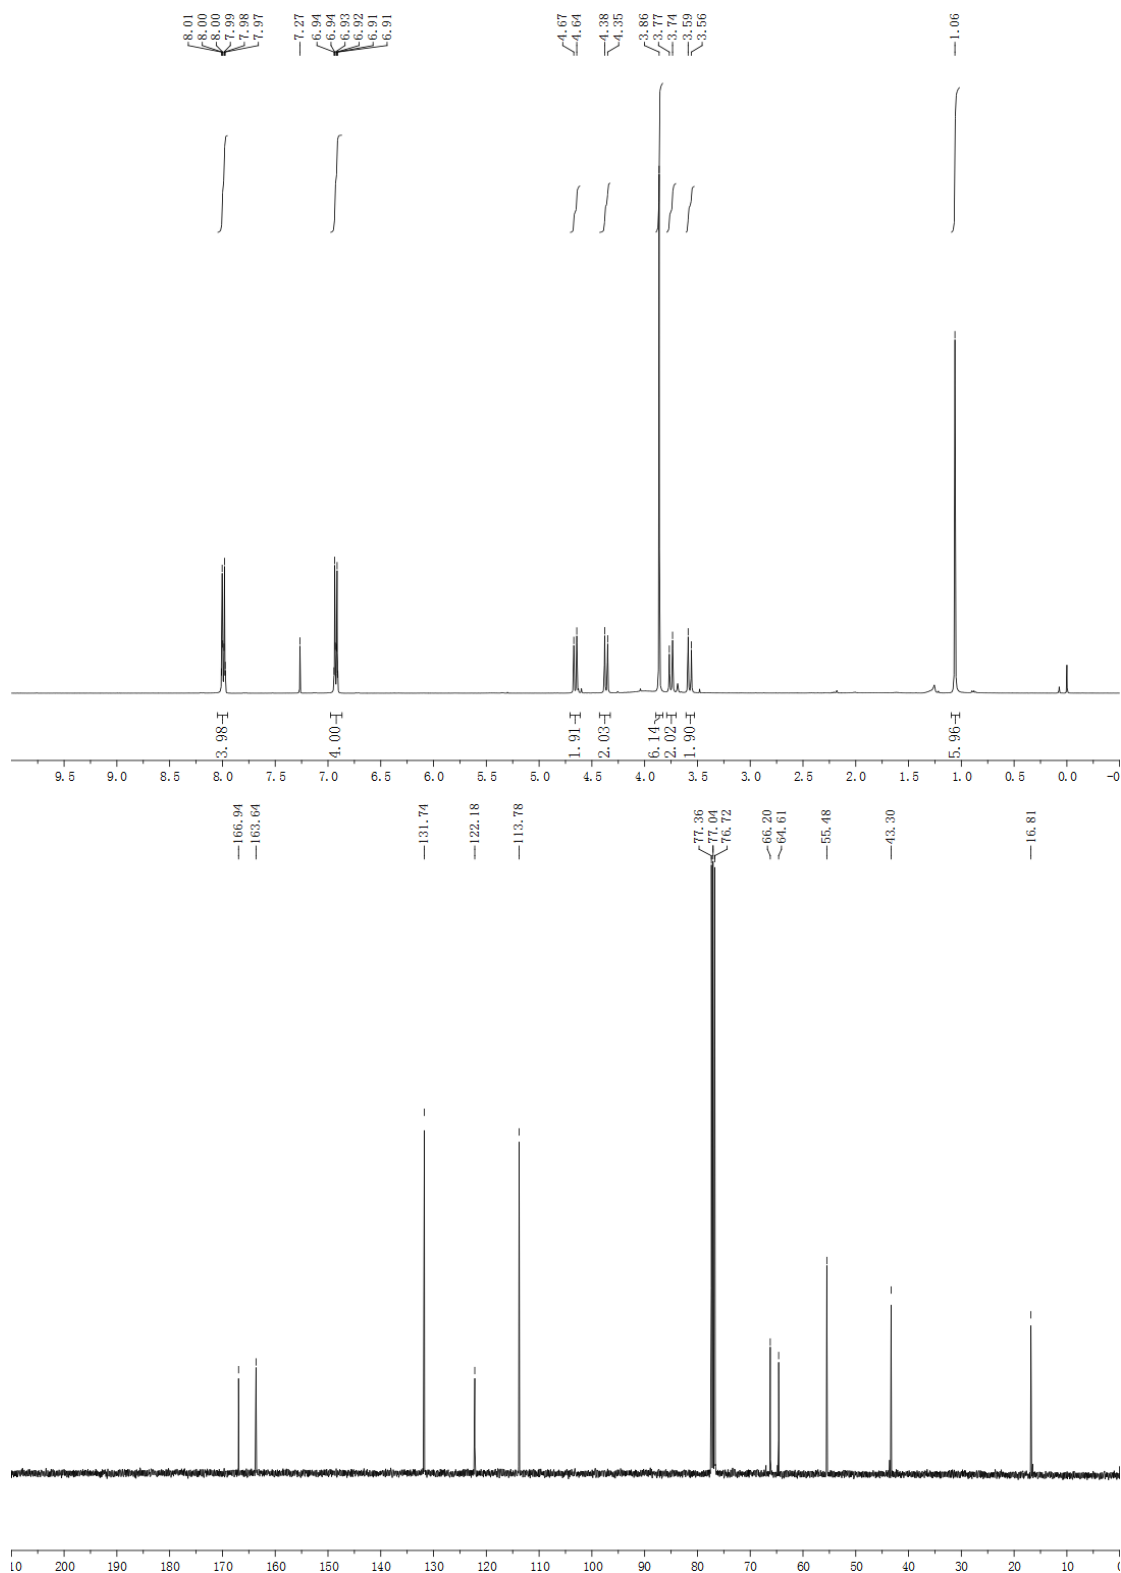

# HPLC of 2g

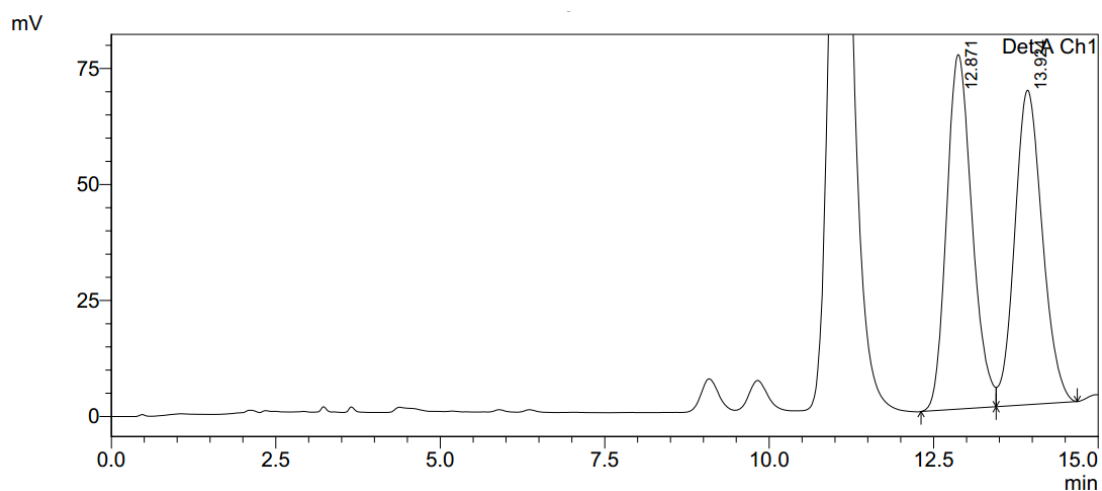

Detector A Ch1 254nm

| Peak# | Ret. Time | Area    | Height | Area %  | Height % |
|-------|-----------|---------|--------|---------|----------|
| 1     | 12.871    | 2056614 | 76423  | 50.931  | 52.994   |
| 2     | 13.924    | 1981446 | 67788  | 49.069  | 47.006   |
| Total |           | 4038060 | 144211 | 100.000 | 100.000  |

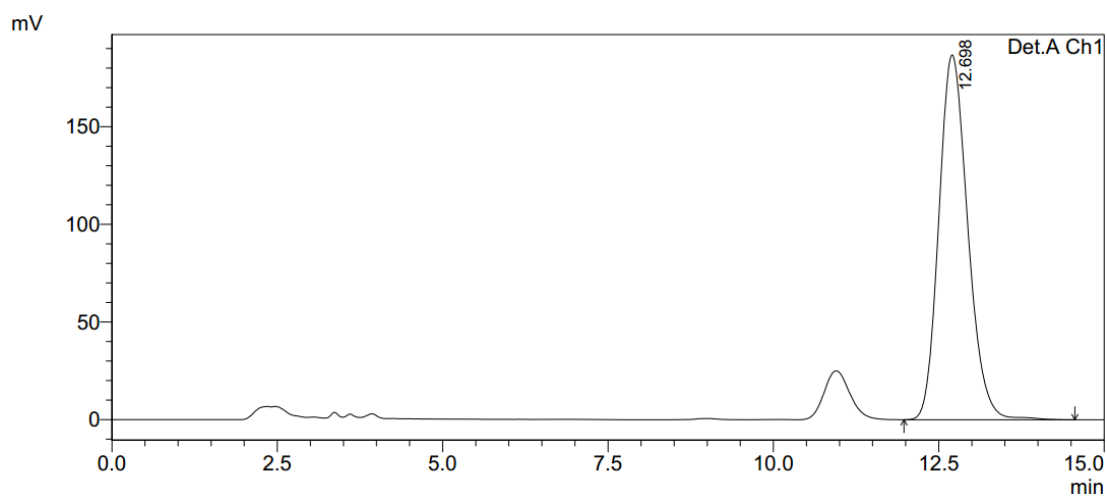

Detector A Ch1 254nm

| Peak# | Ret. Time | Area    | Height | Area %  | Height % |
|-------|-----------|---------|--------|---------|----------|
| 1     | 12.698    | 5682976 | 186841 | 100.000 | 100.000  |
| Total |           | 5682976 | 186841 | 100.000 | 100.000  |



2h  $R_1=R_2=Et$

$^1H$  NMR and  $^{13}C$  NMR of **2h**

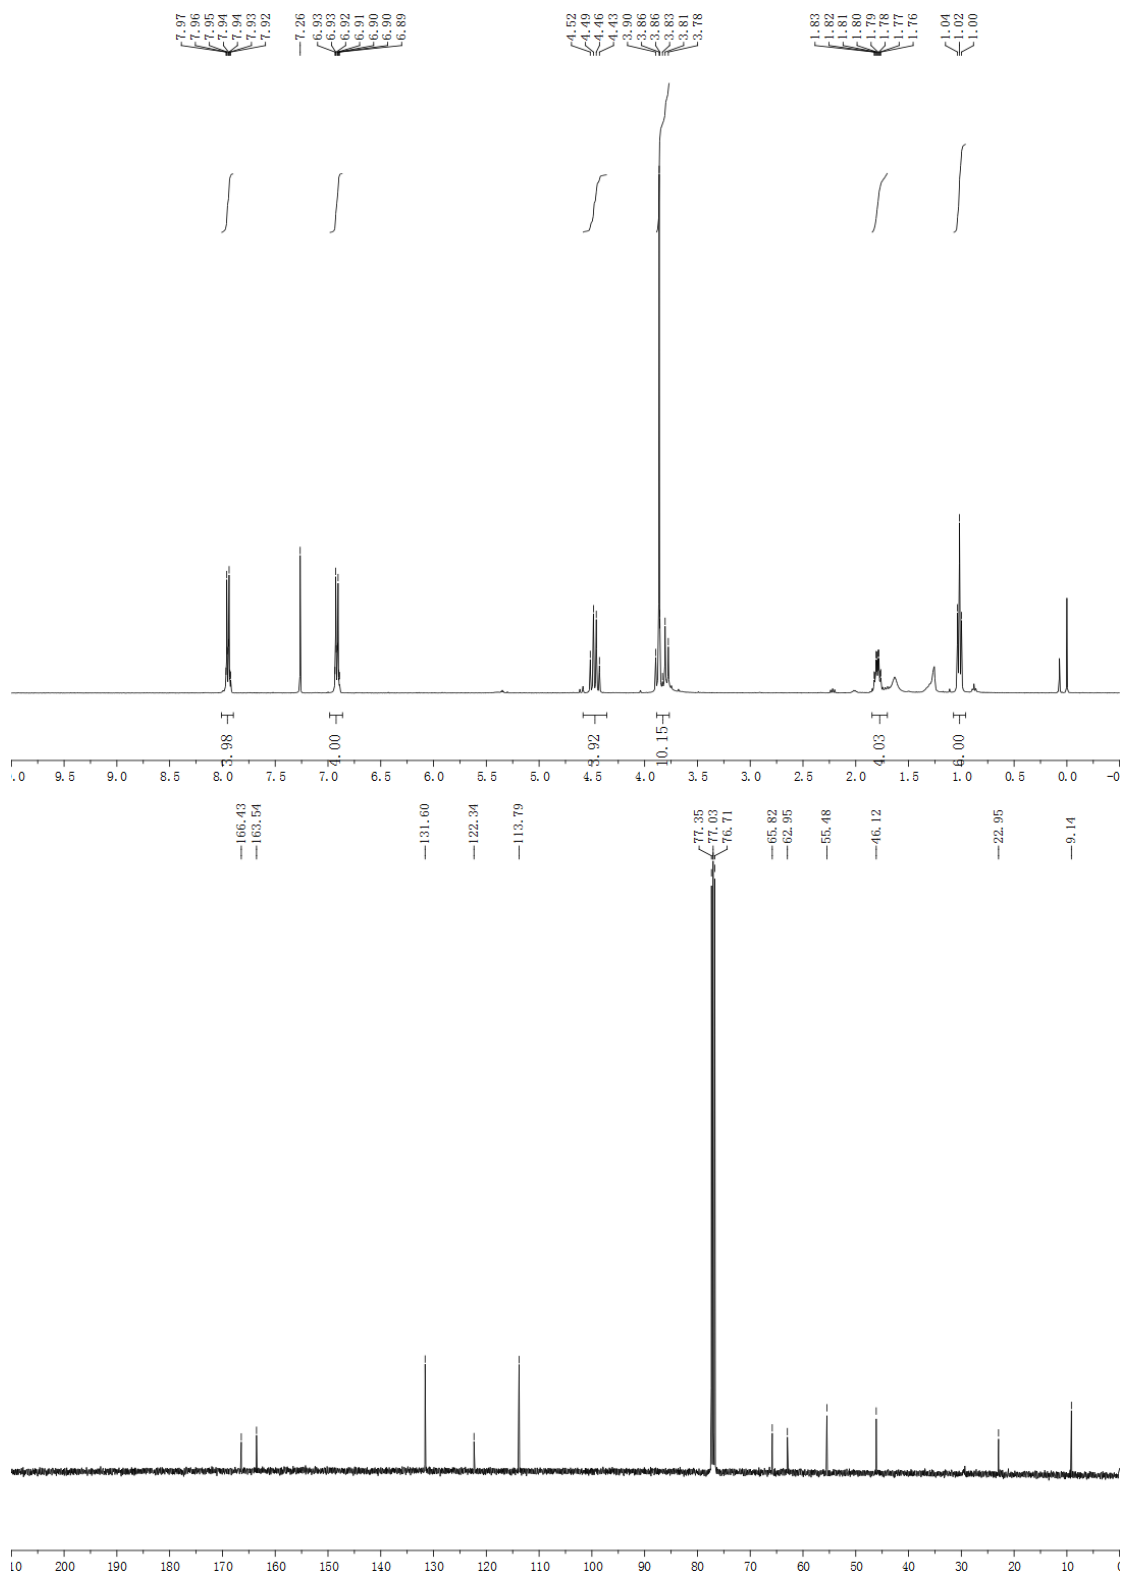

# HPLC of 2h

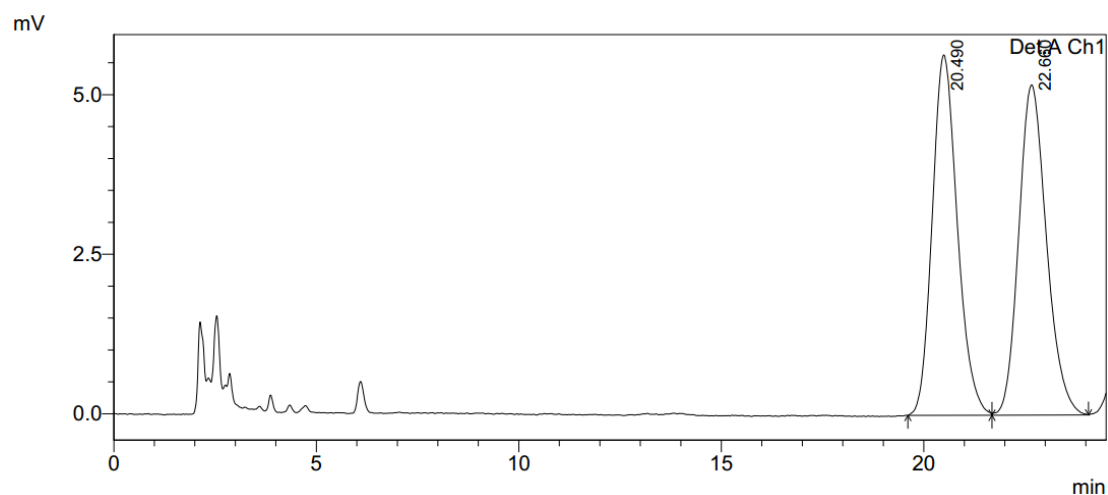

Detector A Ch1 254nm

| Peak# | Ret. Time | Area   | Height | Area %  | Height % |
|-------|-----------|--------|--------|---------|----------|
| 1     | 20.490    | 243499 | 5646   | 49.691  | 52.185   |
| 2     | 22.660    | 246524 | 5174   | 50.309  | 47.815   |
| Total |           | 490022 | 10820  | 100.000 | 100.000  |

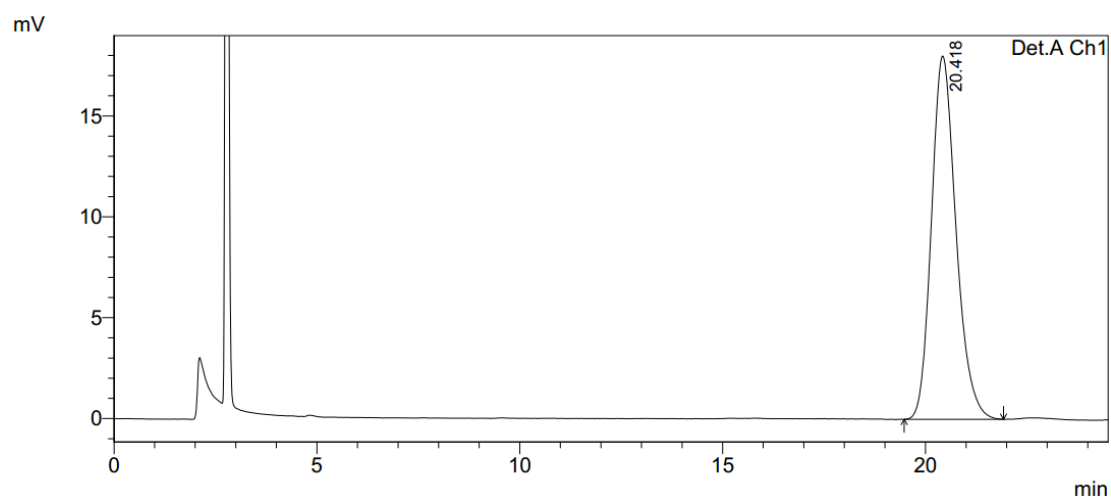

Detector A Ch1 254nm

| Peak# | Ret. Time | Area   | Height | Area %  | Height % |
|-------|-----------|--------|--------|---------|----------|
| 1     | 20.418    | 758817 | 18011  | 100.000 | 100.000  |
| Total |           | 758817 | 18011  | 100.000 | 100.000  |

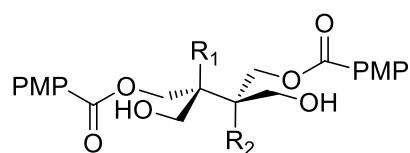

2i R<sub>1</sub>=Bn, R<sub>2</sub>=Me

<sup>1</sup>H NMR and <sup>13</sup>C NMR of 2i

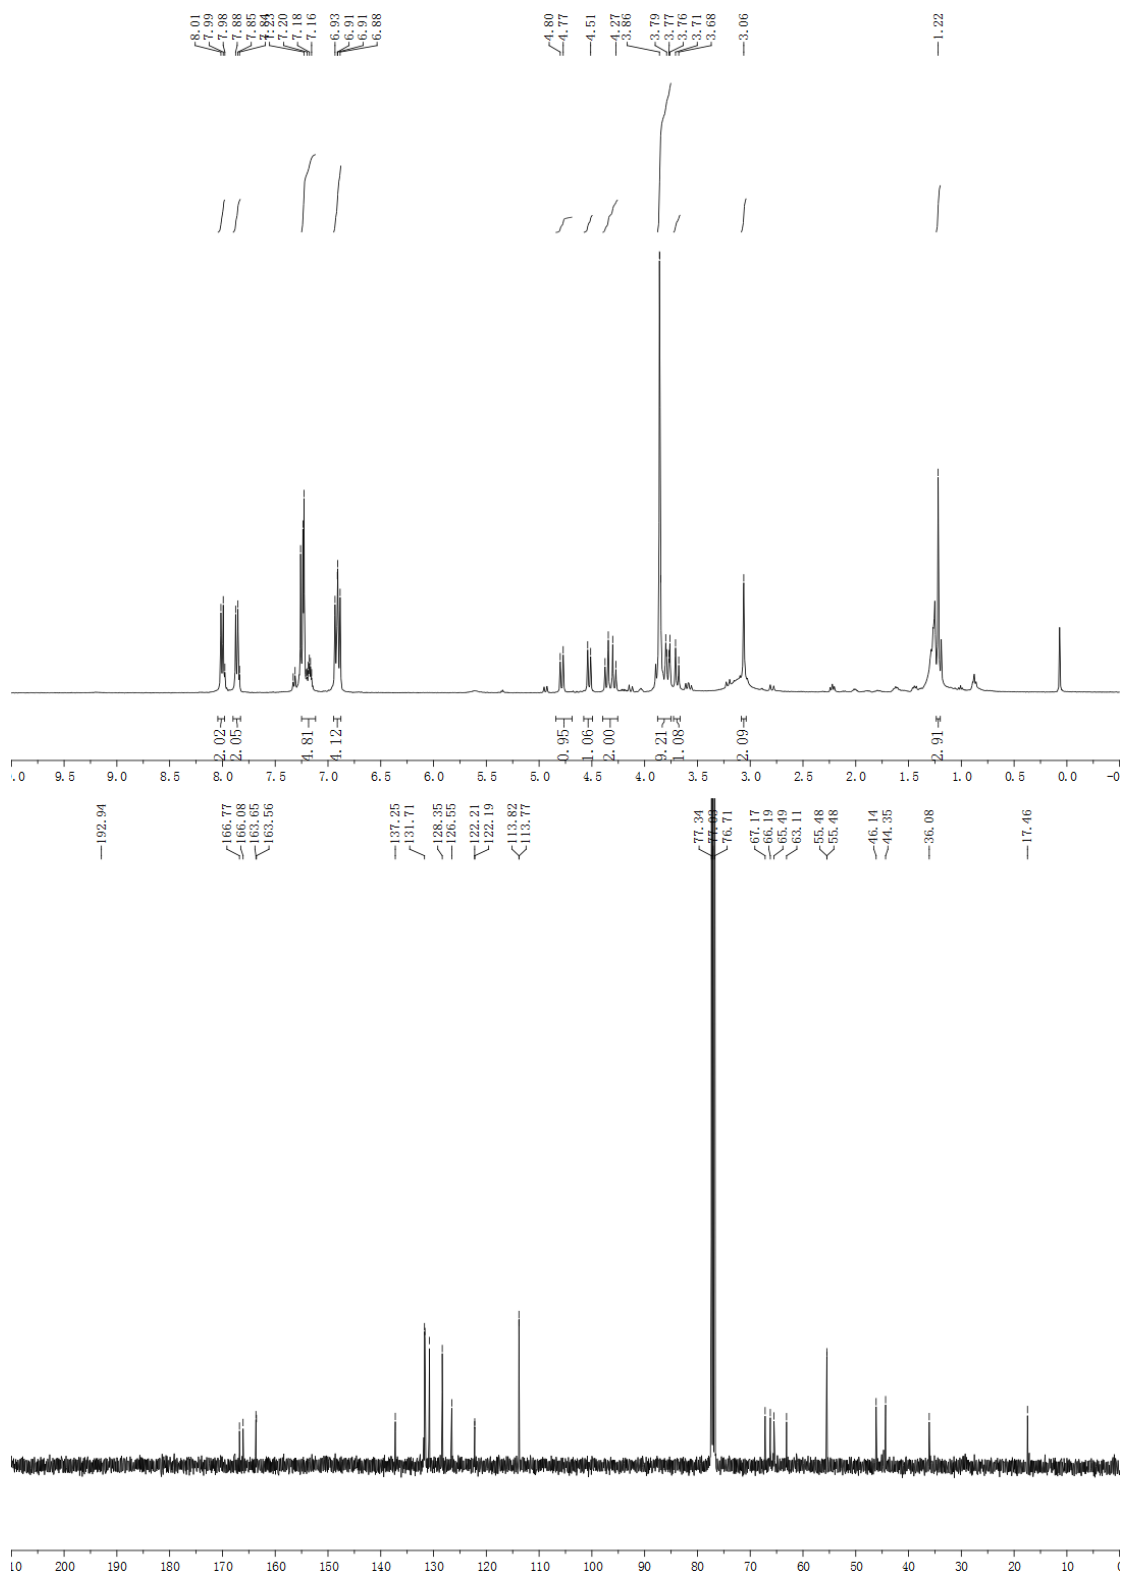

# HPLC of 2i

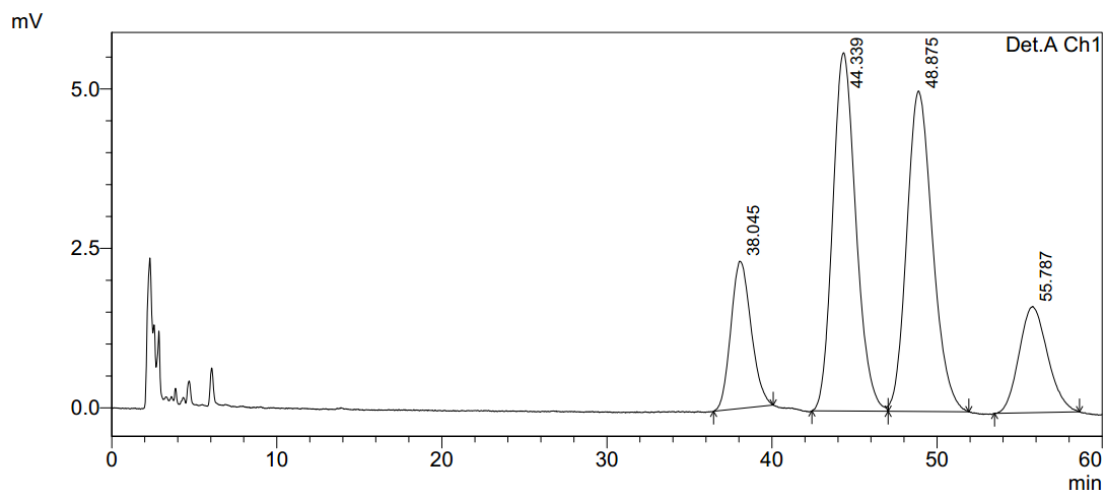

Detector A Ch1 254nm

| Peak# | Ret. Time | Area    | Height | Area %  | Height % |
|-------|-----------|---------|--------|---------|----------|
| 1     | 38.045    | 196757  | 2310   | 13.190  | 15.803   |
| 2     | 44.339    | 549111  | 5617   | 36.810  | 38.425   |
| 3     | 48.875    | 545979  | 5025   | 36.600  | 34.377   |
| 4     | 55.787    | 199894  | 1666   | 13.400  | 11.396   |
| Total |           | 1491740 | 14619  | 100.000 | 100.000  |

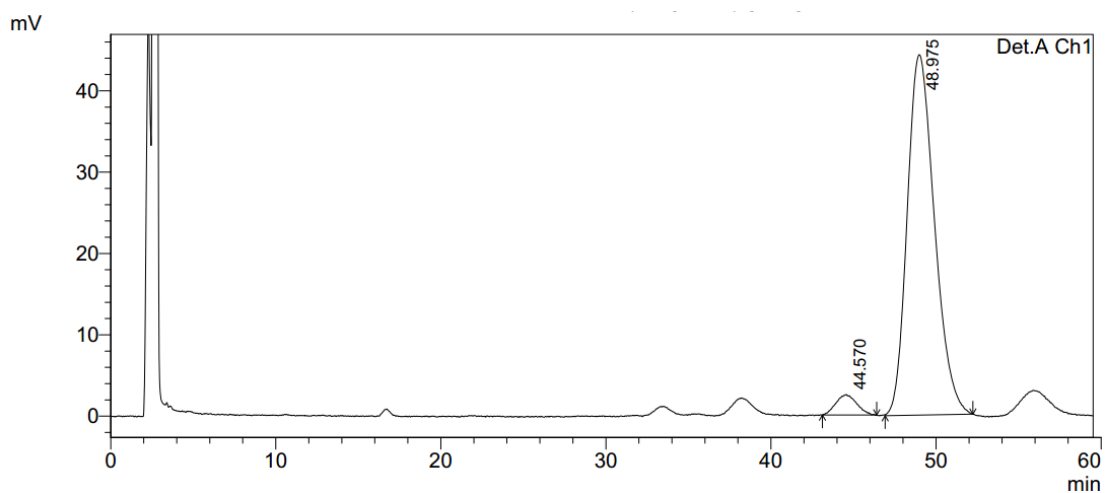

Detector A Ch1 254nm

| Peak# | Ret. Time | Area    | Height | Area %  | Height % |
|-------|-----------|---------|--------|---------|----------|
| 1     | 44.570    | 218229  | 2499   | 4.113   | 5.338    |
| 2     | 48.975    | 5087705 | 44314  | 95.887  | 94.662   |
| Total |           | 5305934 | 46813  | 100.000 | 100.000  |





2I R<sub>1</sub>=Me, R<sub>2</sub>=H

<sup>1</sup>H NMR and <sup>13</sup>C NMR of **2I**

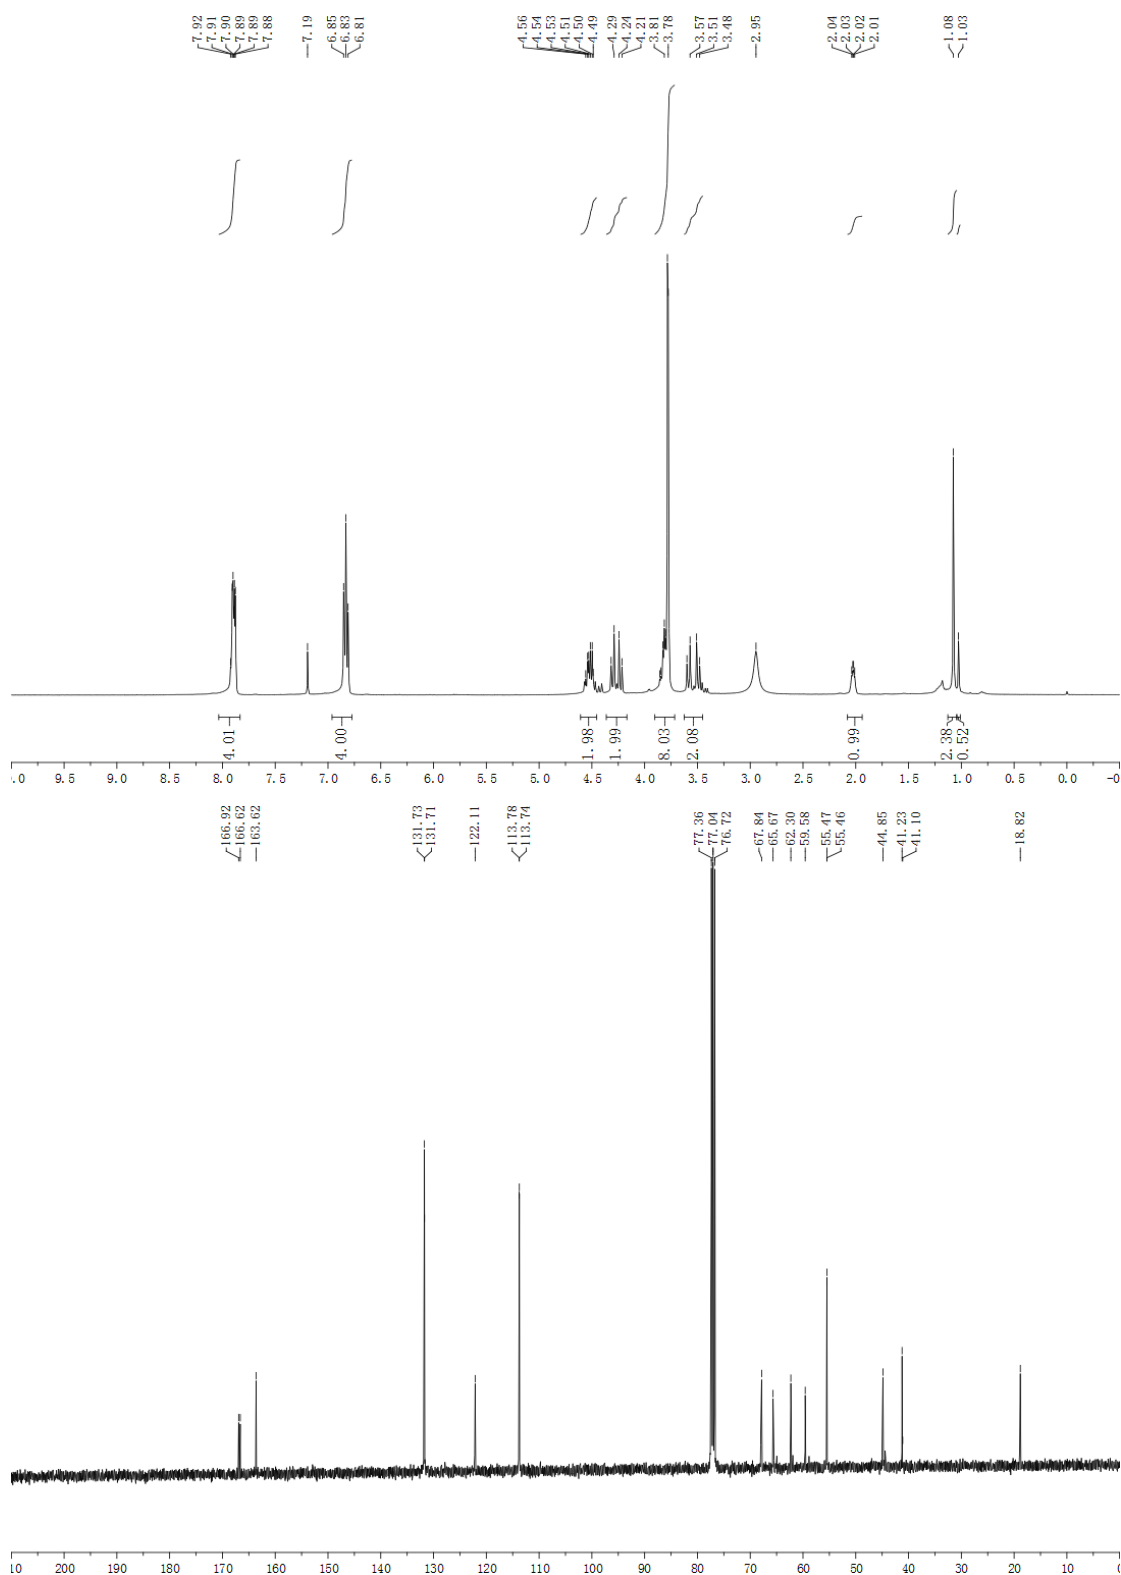

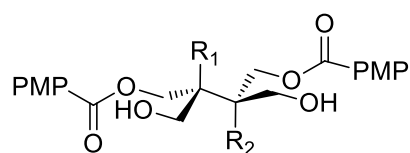

2m  $R_1=iPr$ ,  $R_2=H$

$^1H$  NMR and  $^{13}C$  NMR of **2m**

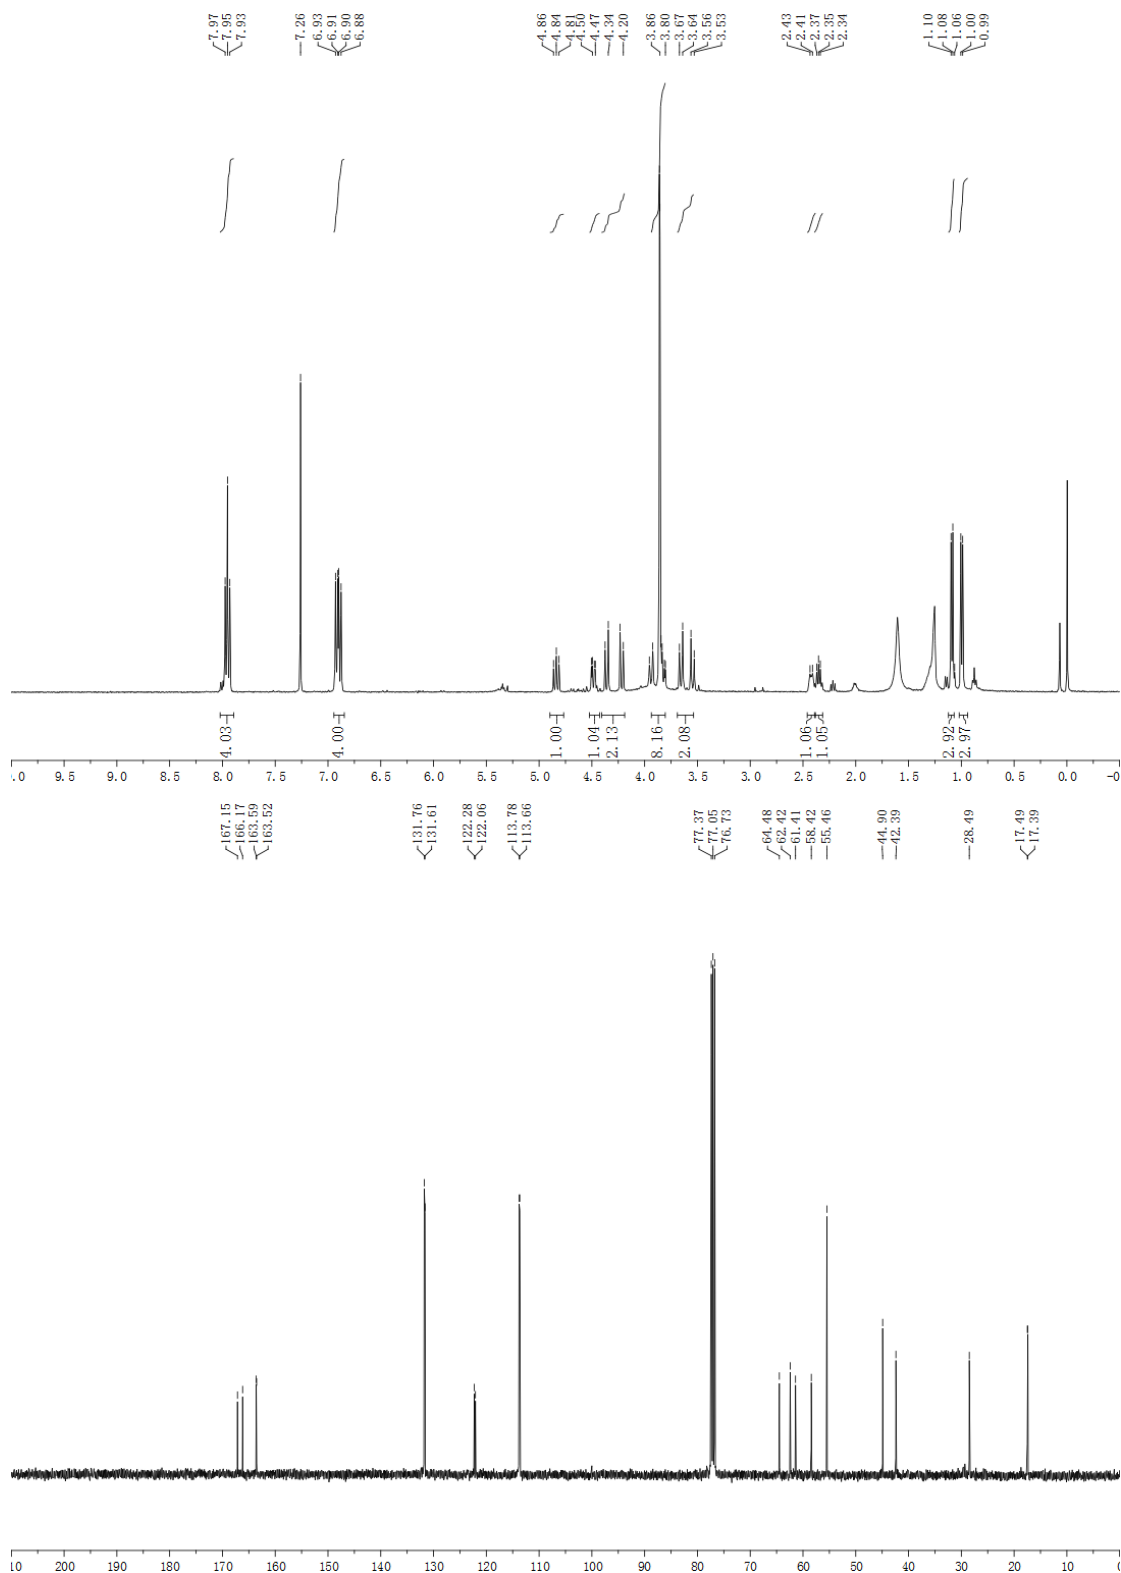

# HPLC of 2m

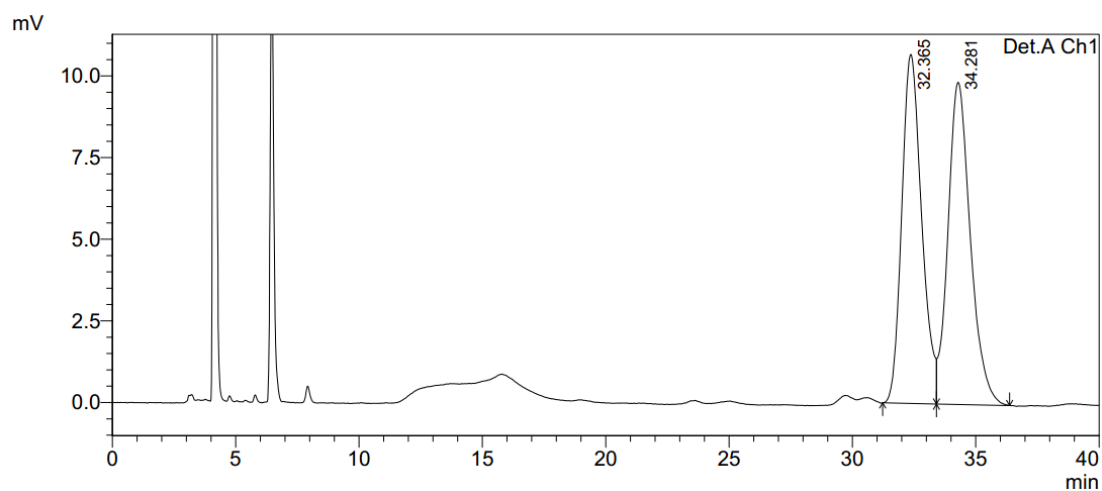

Detector A Ch1 254nm

| Peak# | Ret. Time | Area    | Height | Area %  | Height % |
|-------|-----------|---------|--------|---------|----------|
| 1     | 32.365    | 598535  | 10686  | 48.973  | 52.000   |
| 2     | 34.281    | 623631  | 9864   | 51.027  | 48.000   |
| Total |           | 1222167 | 20550  | 100.000 | 100.000  |

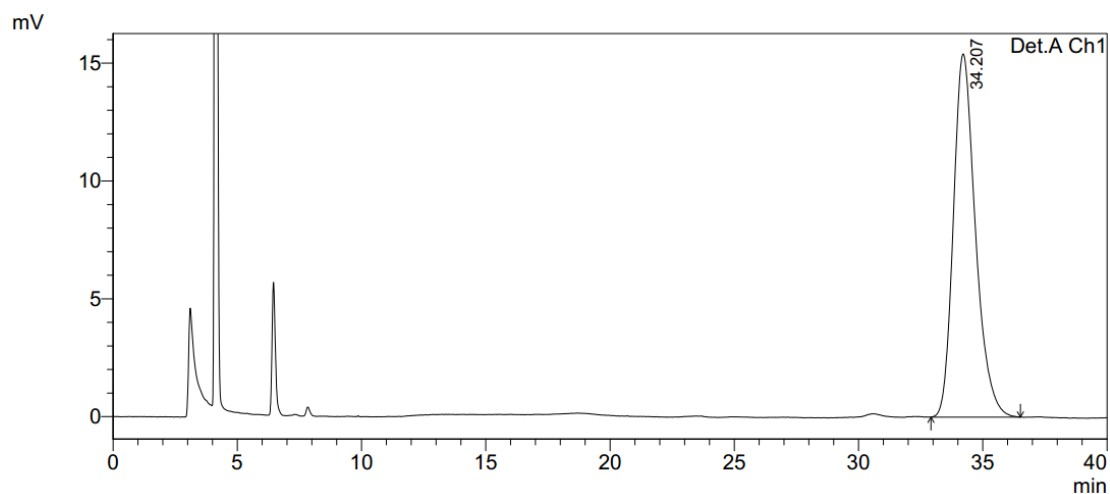

Detector A Ch1 254nm

| Peak# | Ret. Time | Area   | Height | Area %  | Height % |
|-------|-----------|--------|--------|---------|----------|
| 1     | 34.207    | 951128 | 15414  | 100.000 | 100.000  |
| Total |           | 951128 | 15414  | 100.000 | 100.000  |



2n R<sub>1</sub>=Bn, R<sub>2</sub>=H

<sup>1</sup>H NMR and <sup>13</sup>C NMR of **2n**

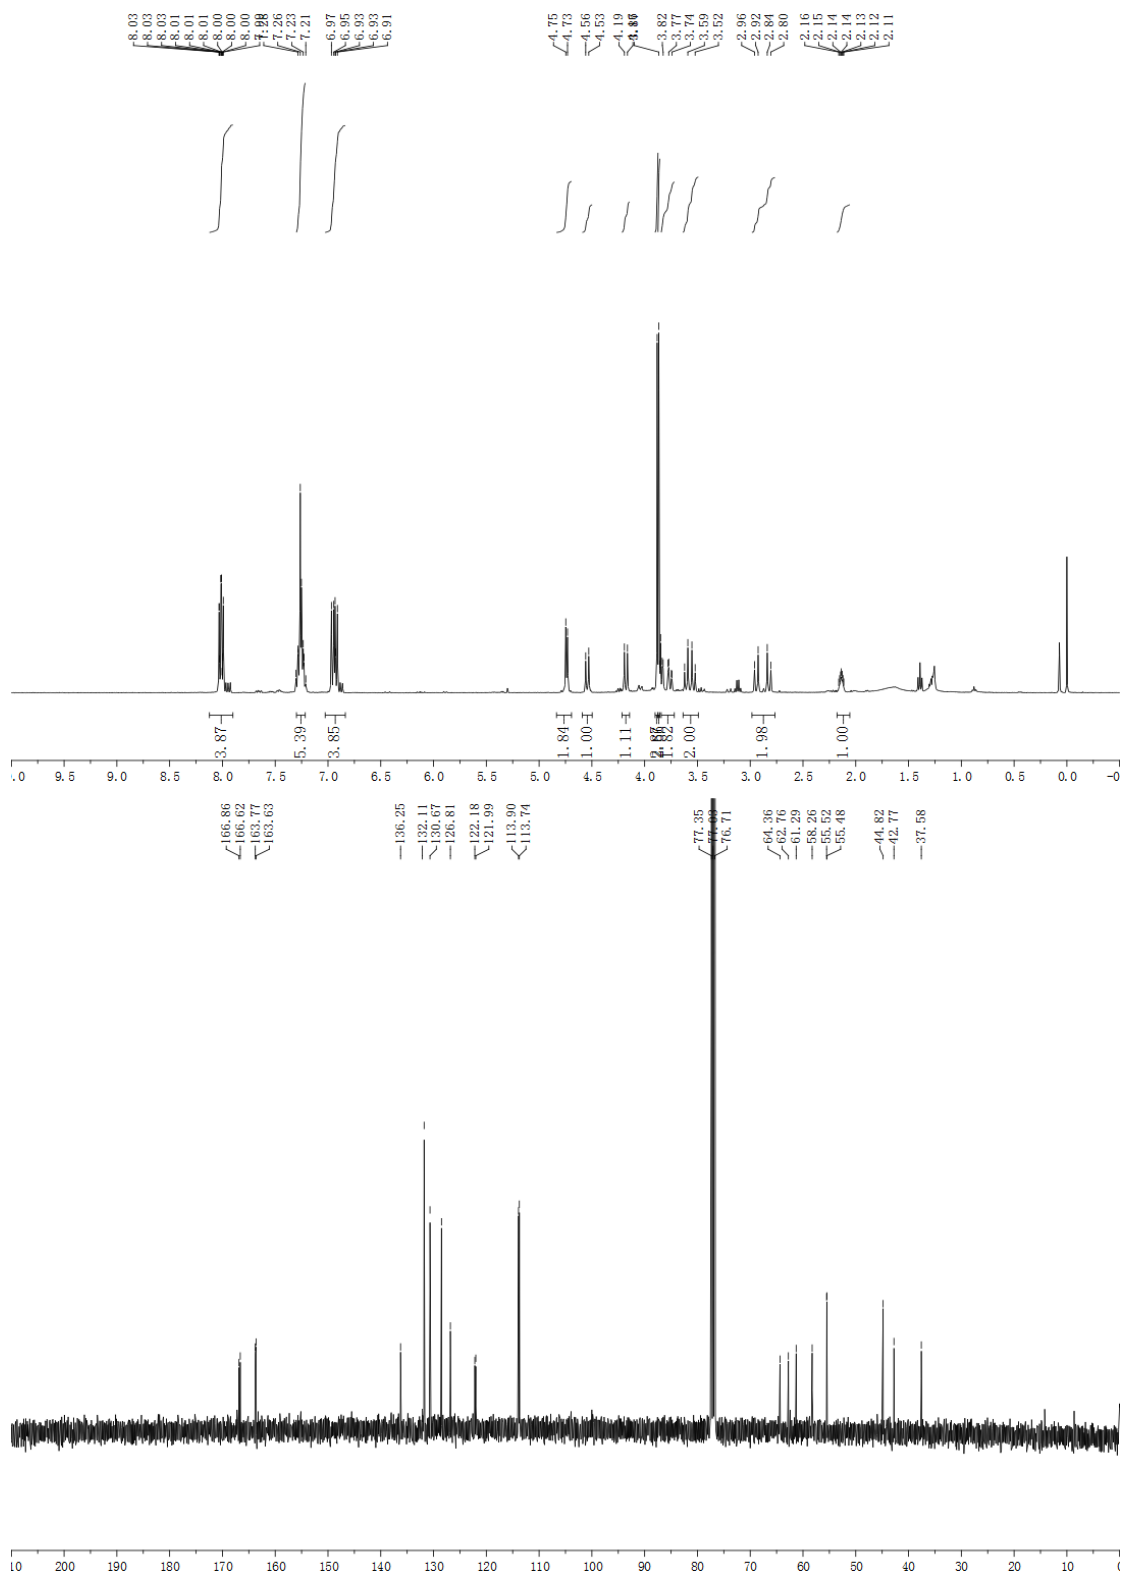

# HPLC of 2n

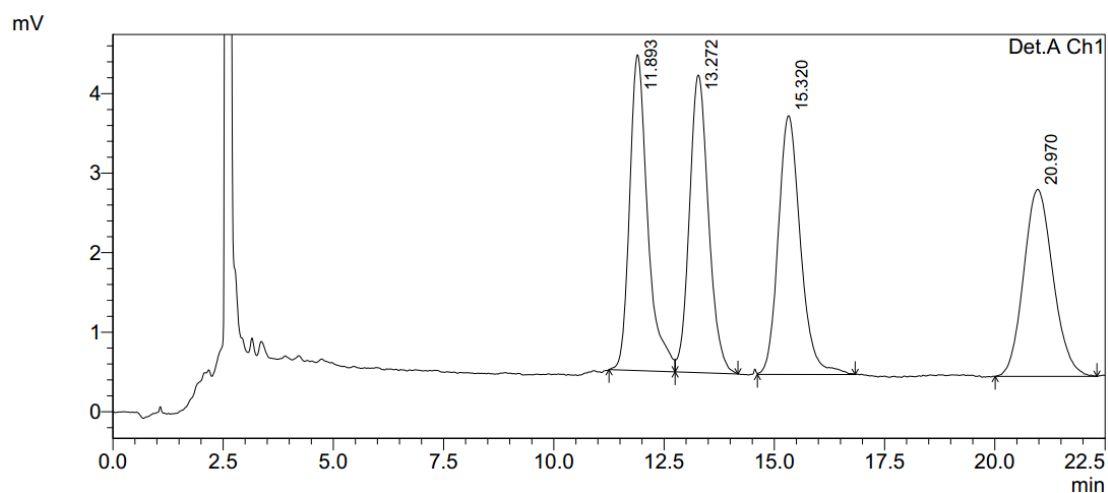

Detector A Ch1 254nm

| Peak# | Ret. Time | Area   | Height | Area %  | Height % |
|-------|-----------|--------|--------|---------|----------|
| 1     | 11.893    | 113228 | 3972   | 25.253  | 29.815   |
| 2     | 13.272    | 112738 | 3743   | 25.144  | 28.098   |
| 3     | 15.320    | 113406 | 3255   | 25.293  | 24.432   |
| 4     | 20.970    | 109003 | 2352   | 24.311  | 17.656   |
| Total |           | 448375 | 13321  | 100.000 | 100.000  |

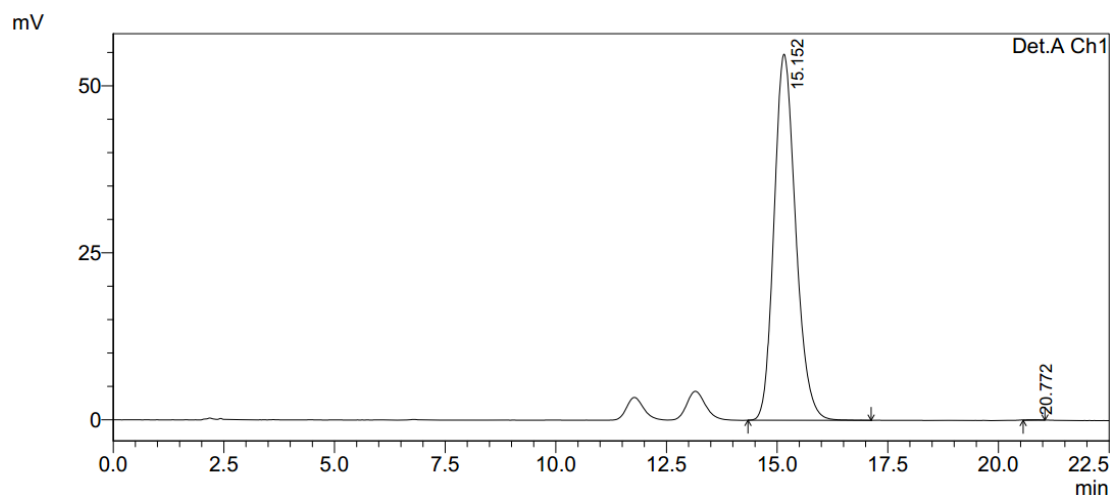

Detector A Ch1 254nm

| Peak# | Ret. Time | Area    | Height | Area %  | Height % |
|-------|-----------|---------|--------|---------|----------|
| 1     | 15.152    | 1861567 | 54828  | 99.900  | 99.852   |
| 2     | 20.772    | 1862    | 81     | 0.100   | 0.148    |
| Total |           | 1863429 | 54909  | 100.000 | 100.000  |



2o R<sub>1</sub>=Ph, R<sub>2</sub>=H

<sup>1</sup>H NMR and <sup>13</sup>C NMR of **2o**

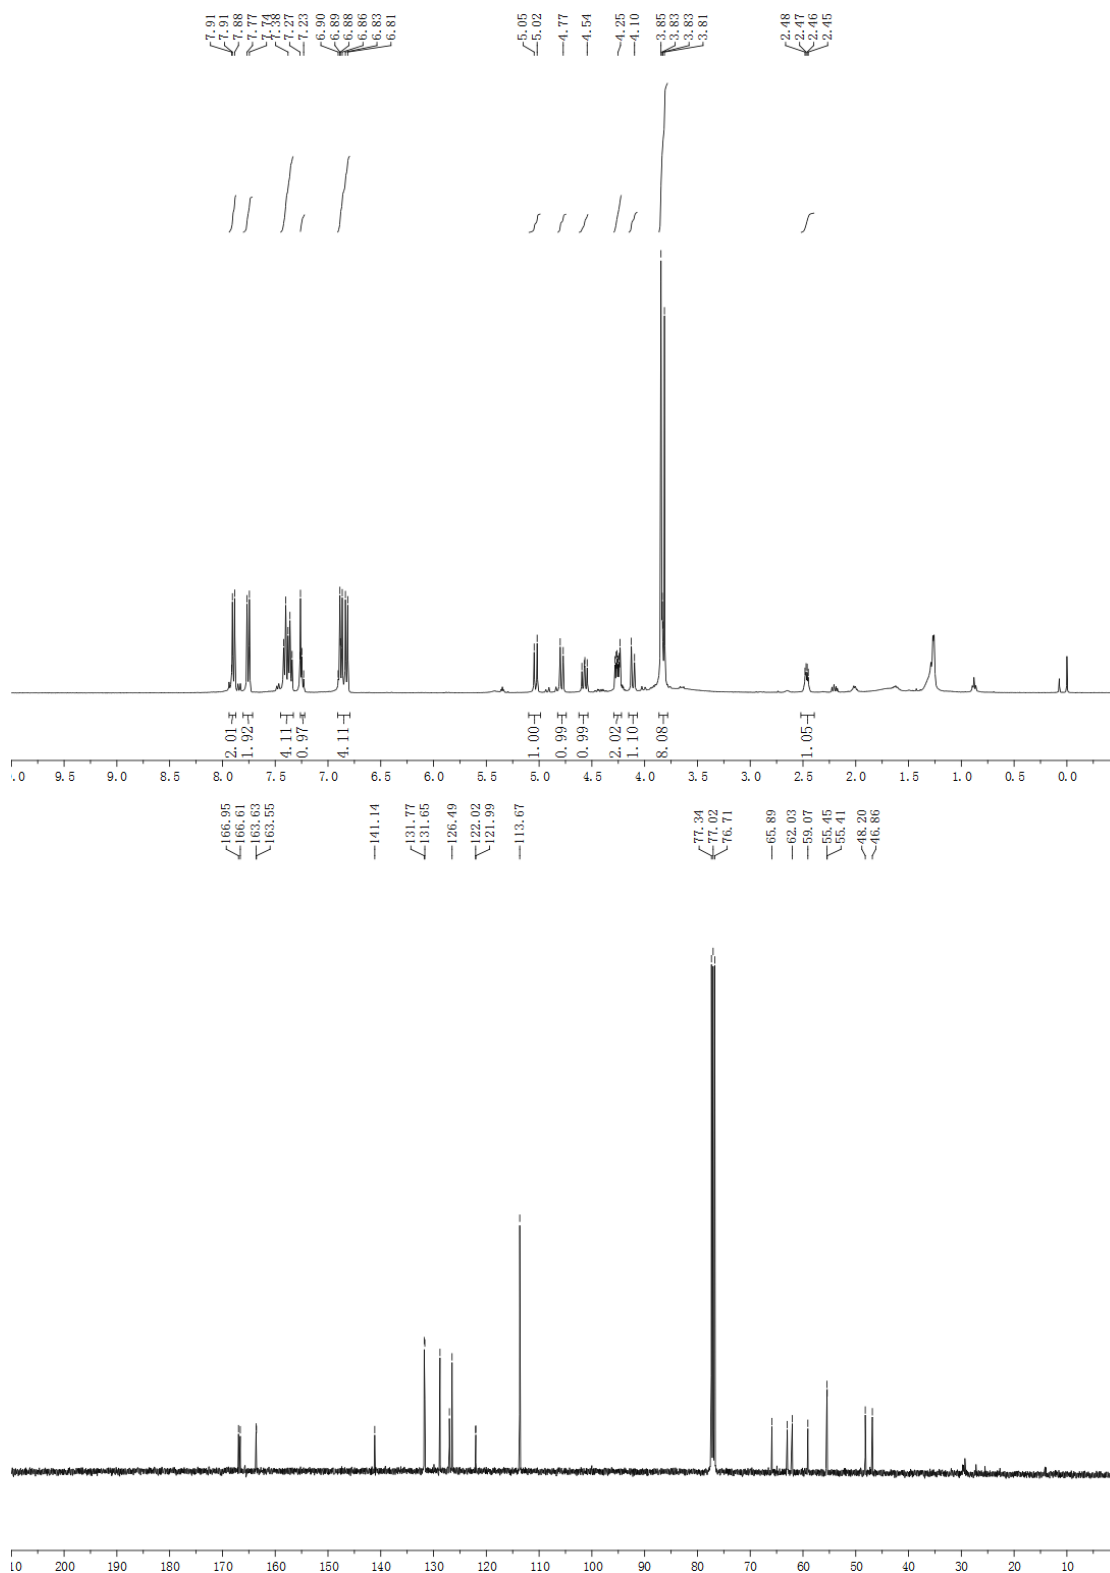

# HPLC of 2o

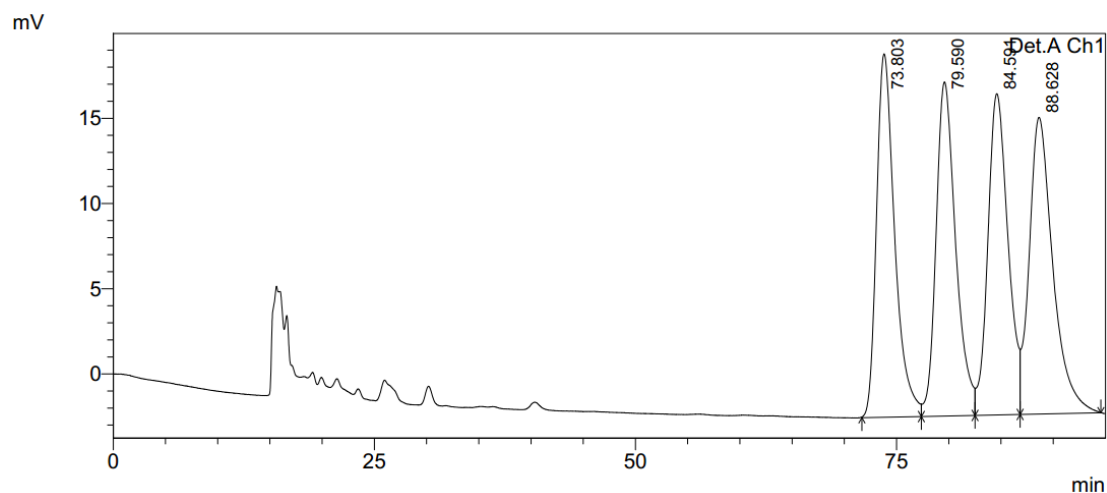

Detector A Ch1 254nm

| Peak# | Ret. Time | Area     | Height | Area %  | Height % |
|-------|-----------|----------|--------|---------|----------|
| 1     | 73.803    | 2576184  | 21325  | 24.748  | 27.634   |
| 2     | 79.590    | 2564243  | 19597  | 24.633  | 25.394   |
| 3     | 84.591    | 2528115  | 18847  | 24.286  | 24.423   |
| 4     | 88.628    | 2741120  | 17401  | 26.332  | 22.549   |
| Total |           | 10409662 | 77170  | 100.000 | 100.000  |

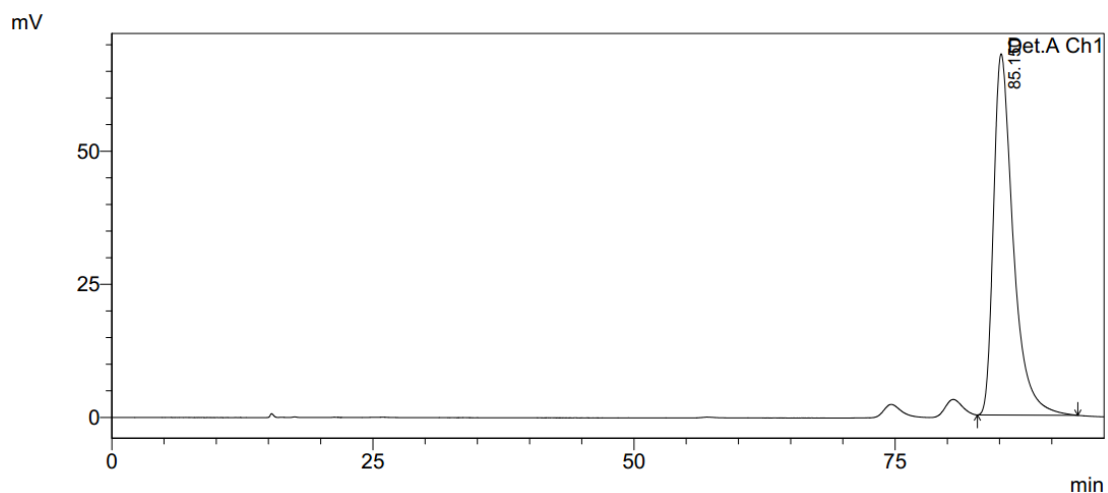

Detector A Ch1 254nm

| Peak# | Ret. Time | Area    | Height | Area %  | Height % |
|-------|-----------|---------|--------|---------|----------|
| 1     | 85.150    | 8894760 | 67852  | 100.000 | 100.000  |
| Total |           | 8894760 | 67852  | 100.000 | 100.000  |

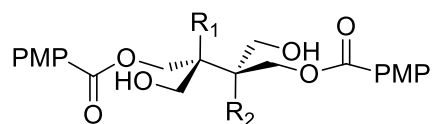

2j R<sub>1</sub>=Me, R<sub>2</sub>=Bn

<sup>1</sup>H NMR and <sup>13</sup>C NMR of **2j**

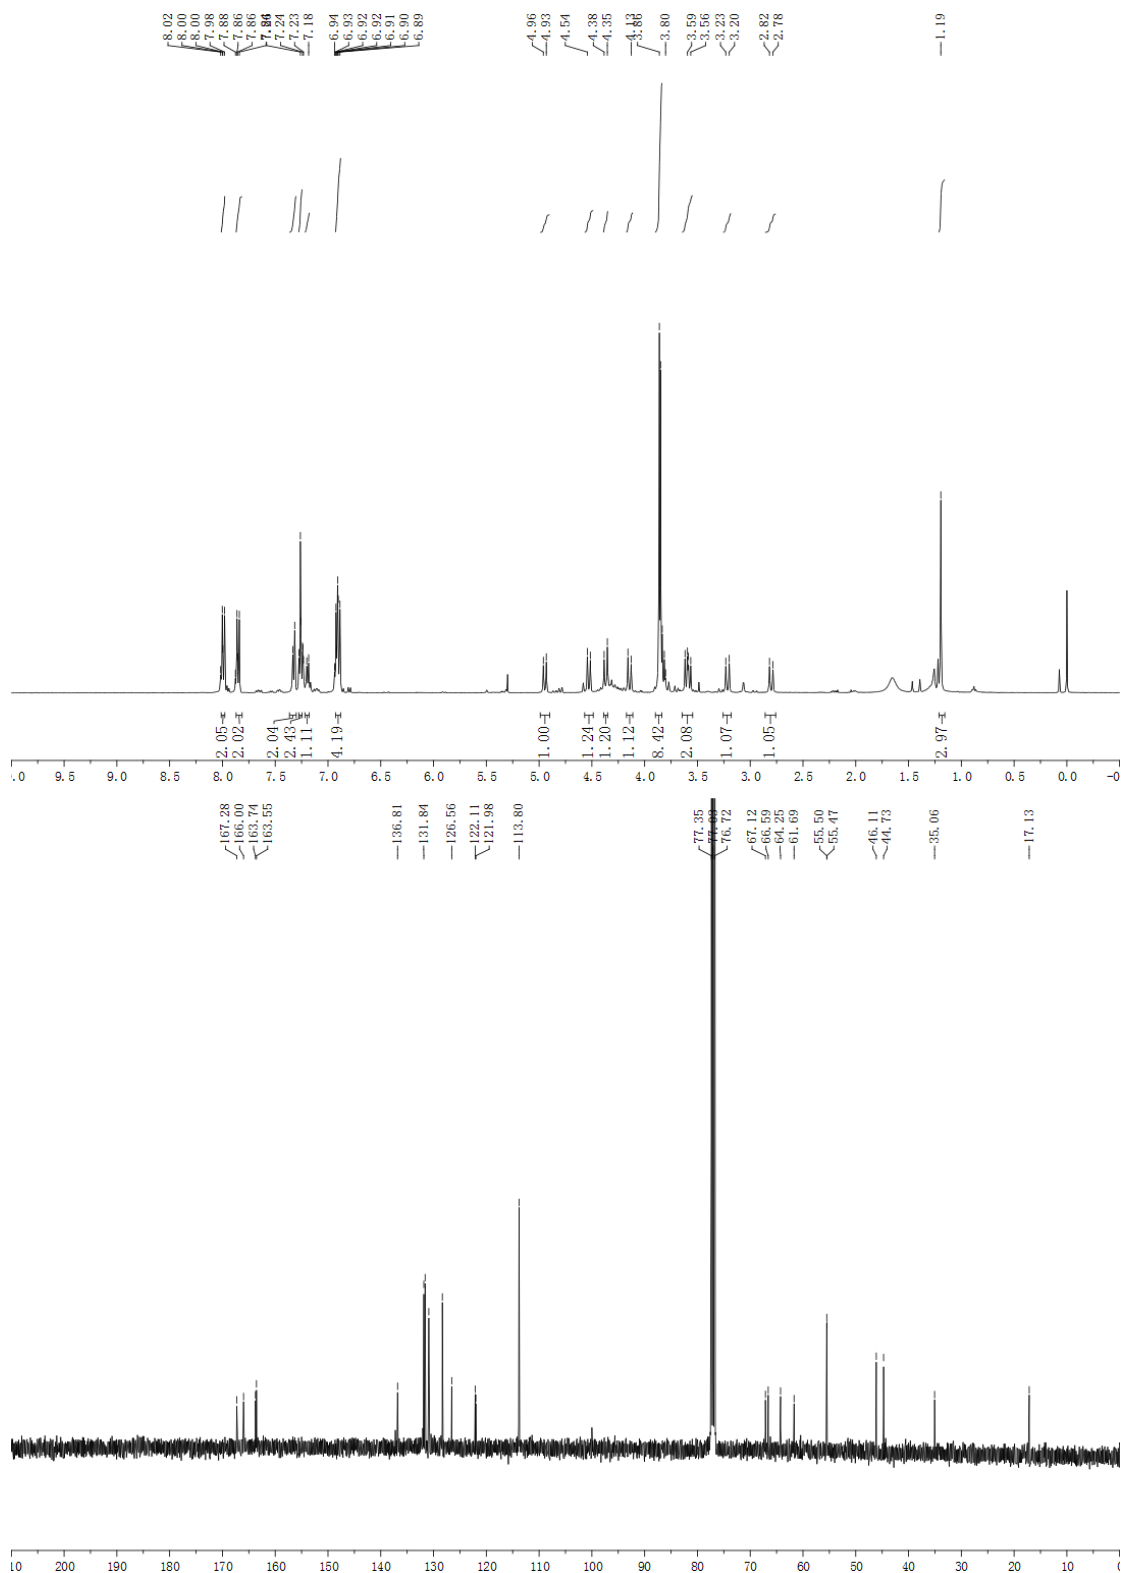



# HPLC of 2j

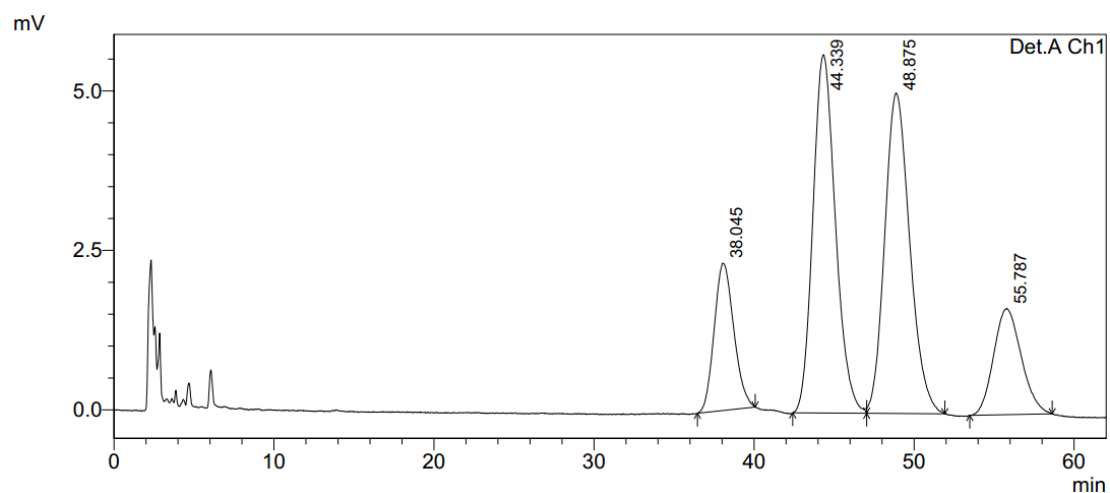

Detector A Ch1 254nm

| Peak# | Ret. Time | Area    | Height | Area %  | Height % |
|-------|-----------|---------|--------|---------|----------|
| 1     | 38.045    | 196757  | 2310   | 13.190  | 15.803   |
| 2     | 44.339    | 549111  | 5617   | 36.810  | 38.425   |
| 3     | 48.875    | 545979  | 5025   | 36.600  | 34.377   |
| 4     | 55.787    | 199894  | 1666   | 13.400  | 11.396   |
| Total |           | 1491740 | 14619  | 100.000 | 100.000  |

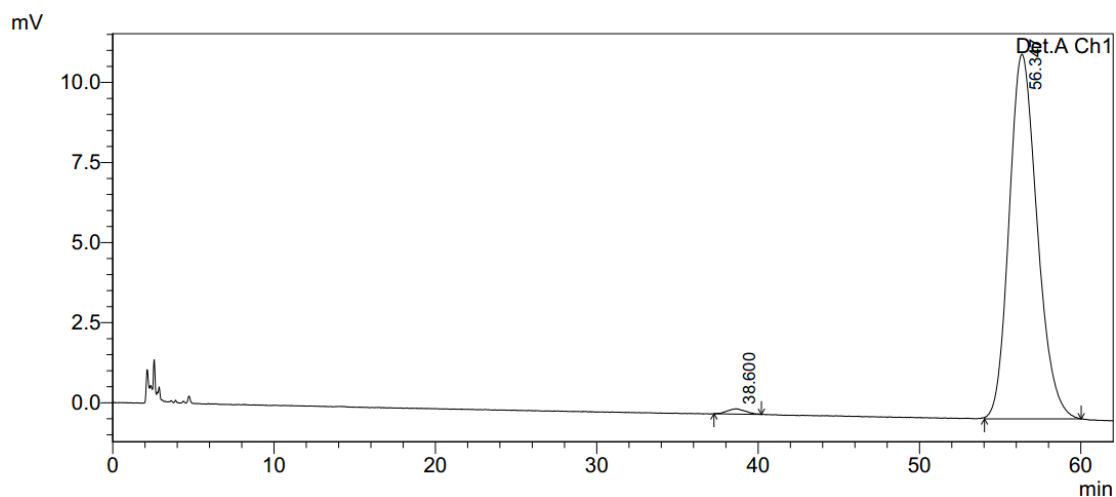

Detector A Ch1 254nm

| Peak# | Ret. Time | Area    | Height | Area %  | Height % |
|-------|-----------|---------|--------|---------|----------|
| 1     | 38.600    | 12937   | 166    | 0.931   | 1.441    |
| 2     | 56.347    | 1376357 | 11385  | 99.069  | 98.559   |
| Total |           | 1389294 | 11552  | 100.000 | 100.000  |



2k  $R_1=Me$ ,  $R_2=Ph$

$^1H$  NMR and  $^{13}C$  NMR of **2k**

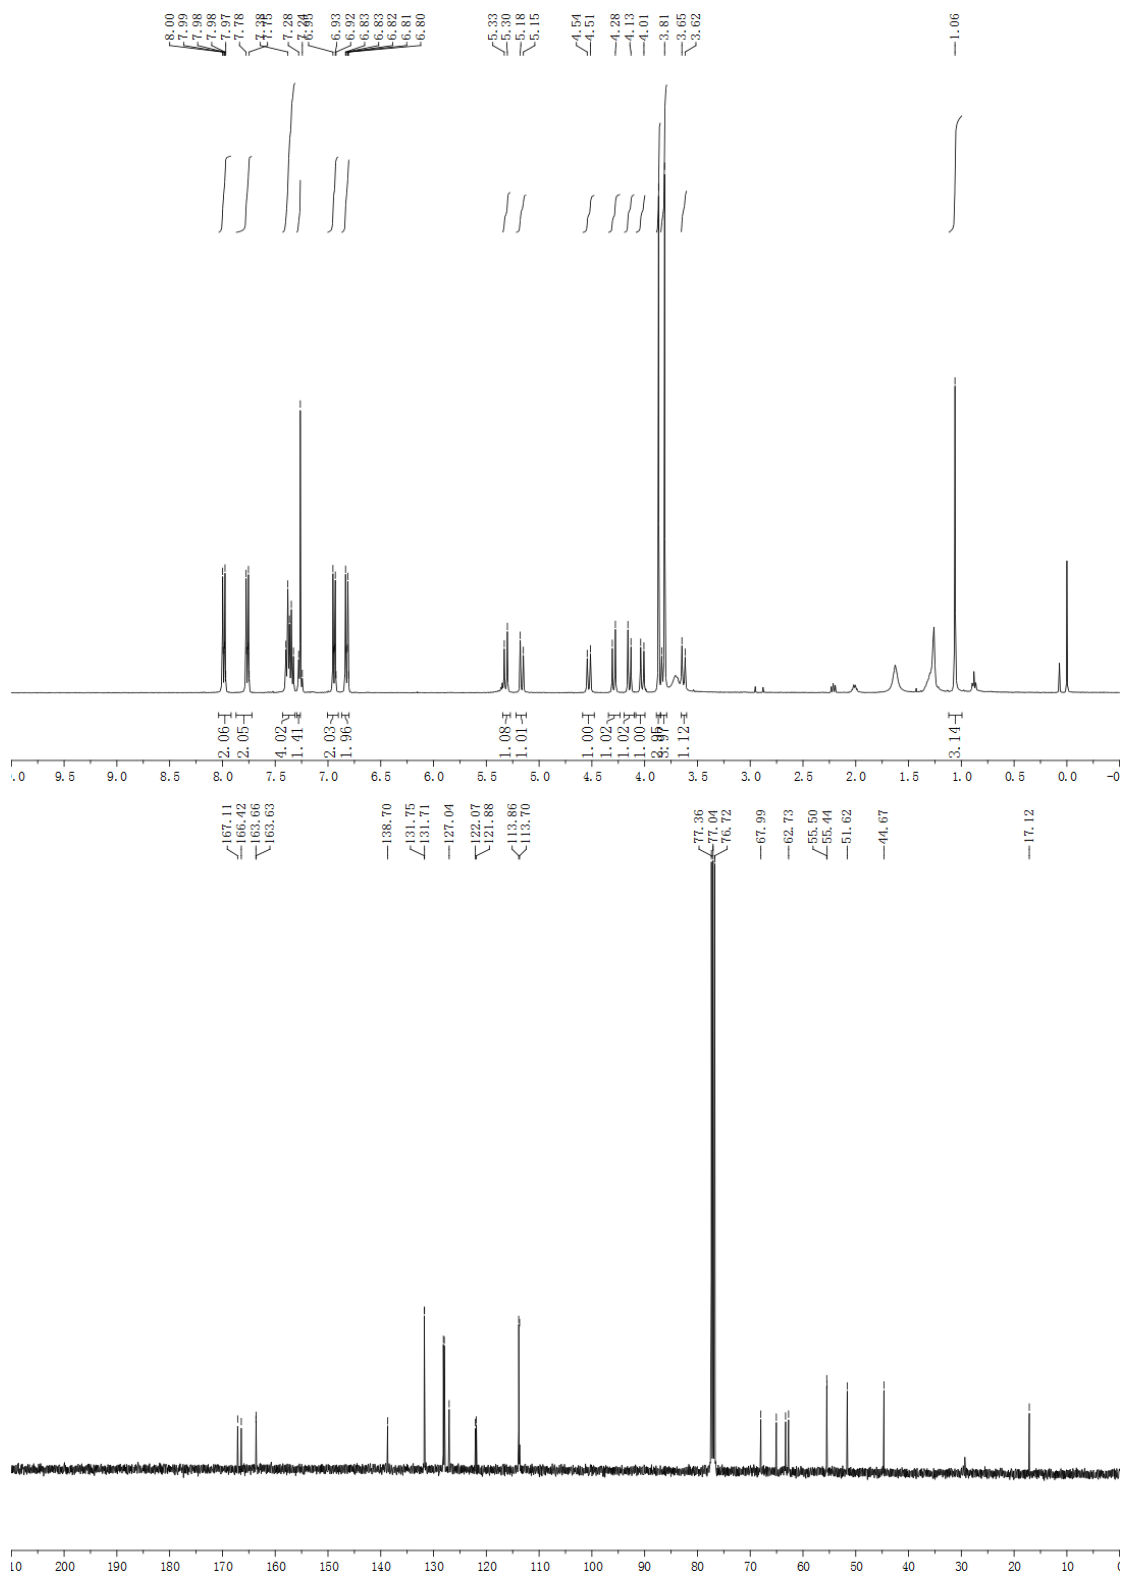

# HPLC of 2k

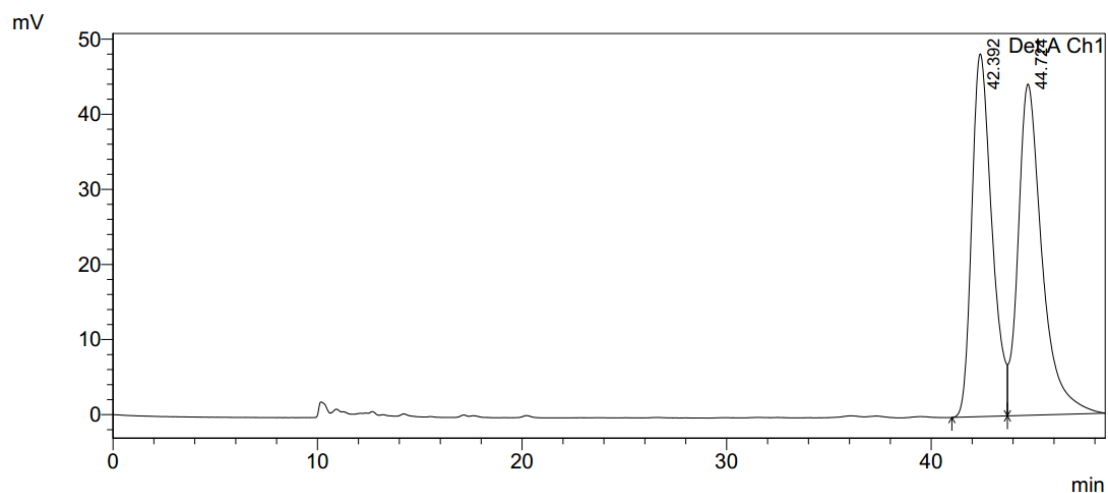

Detector A Ch1 254nm

| Peak# | Ret. Time | Area    | Height | Area %  | Height % |
|-------|-----------|---------|--------|---------|----------|
| 1     | 42.392    | 3291141 | 48311  | 47.824  | 52.270   |
| 2     | 44.724    | 3590635 | 44114  | 52.176  | 47.730   |
| Total |           | 6881776 | 92425  | 100.000 | 100.000  |

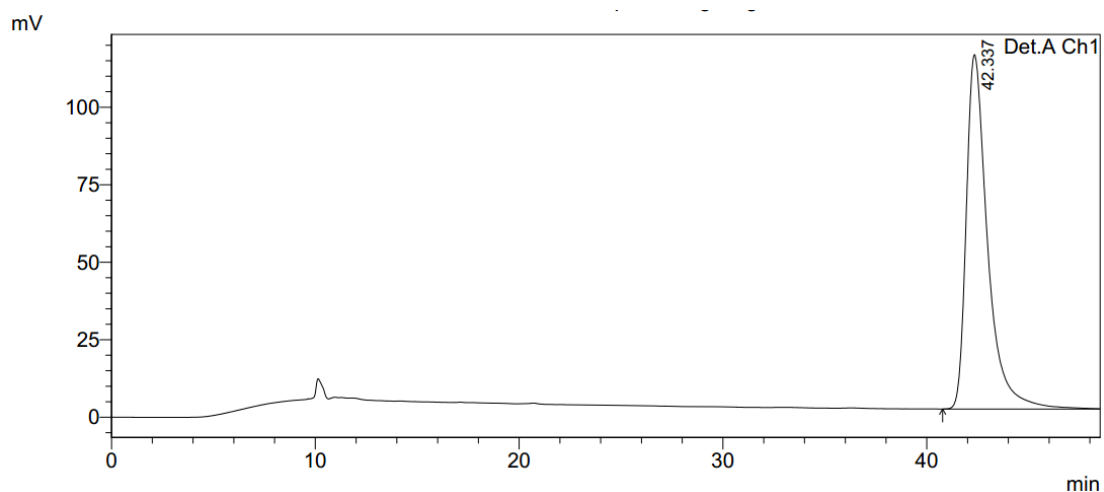

Detector A Ch1 254nm

| Peak# | Ret. Time | Area    | Height | Area %  | Height % |
|-------|-----------|---------|--------|---------|----------|
| 1     | 42.337    | 8319933 | 114302 | 100.000 | 100.000  |
| Total |           | 8319933 | 114302 | 100.000 | 100.000  |

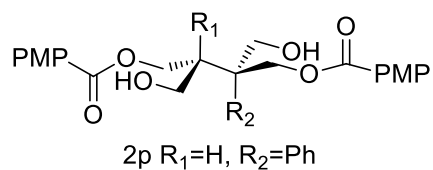

$^1\text{H}$  NMR and  $^{13}\text{C}$  NMR of **2p**

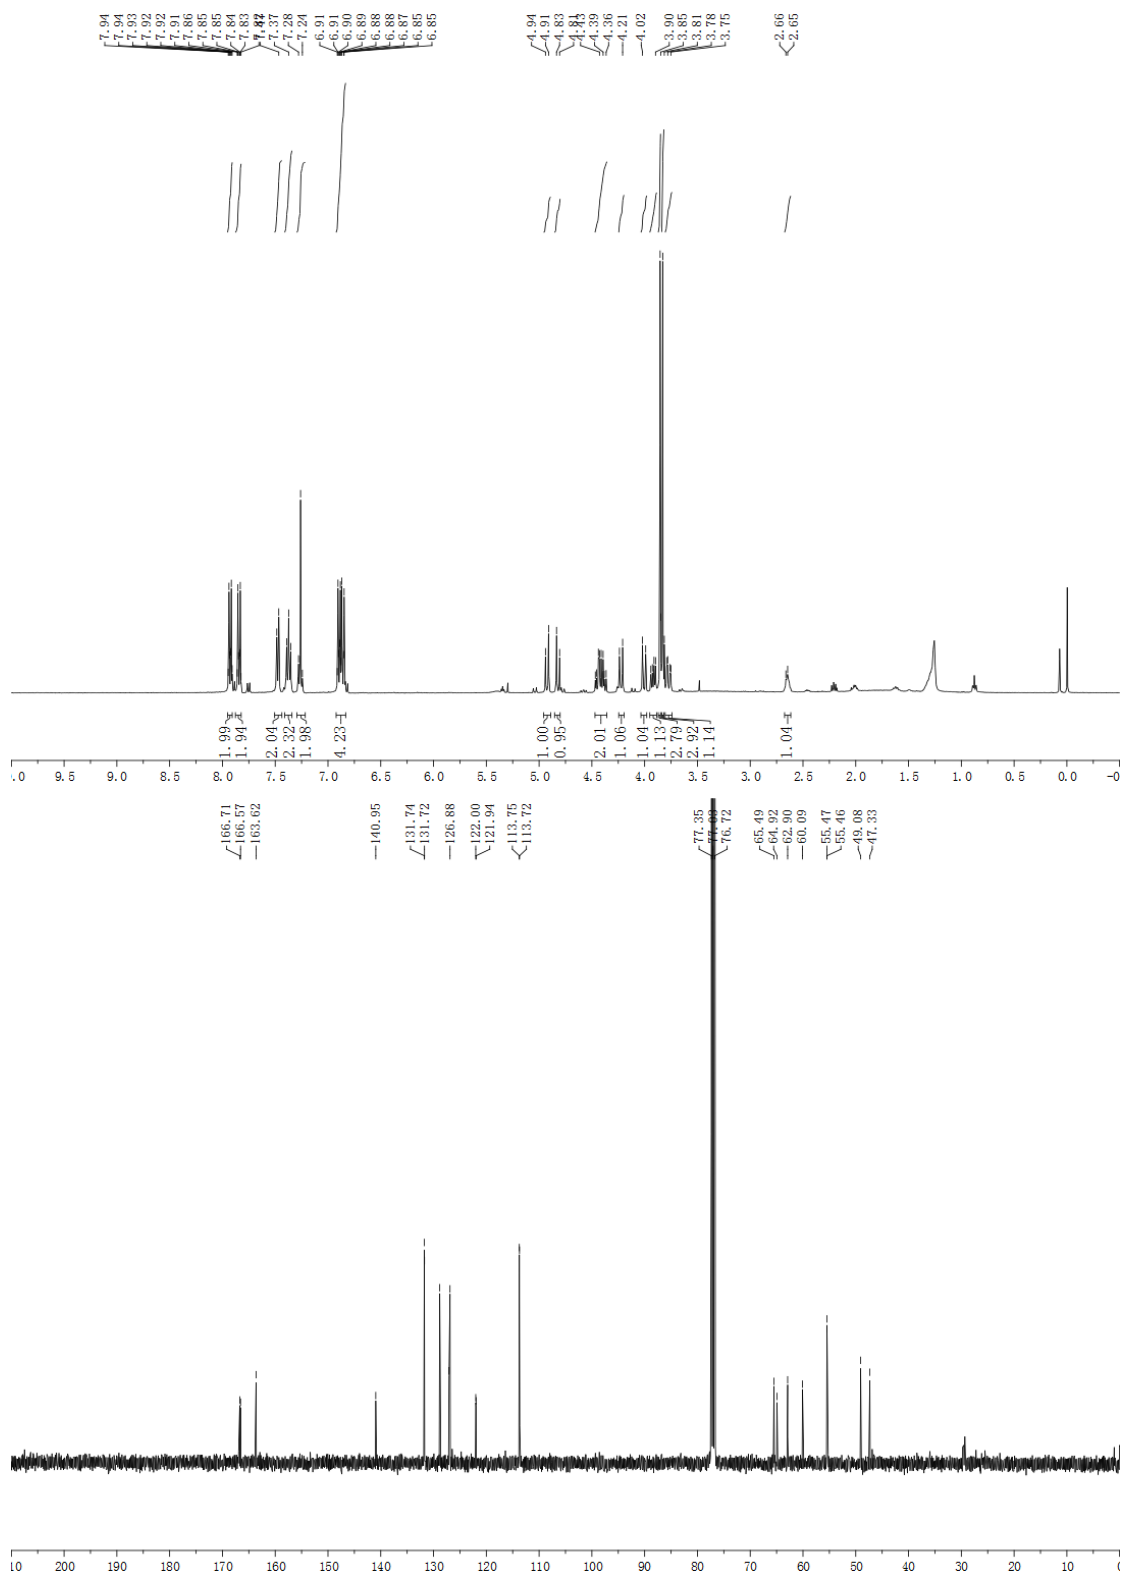

# HPLC of 2p

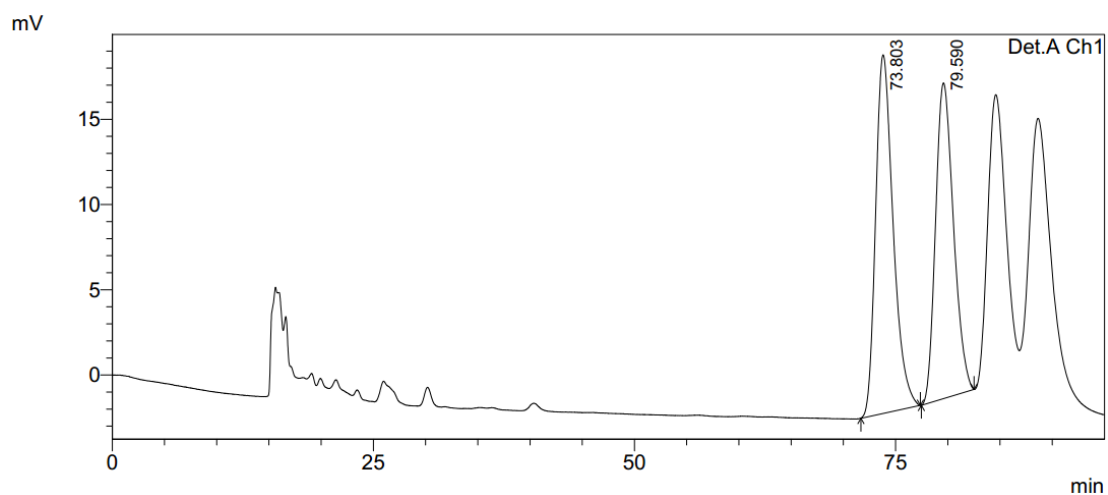

Detector A Ch1 254nm

| Peak# | Ret. Time | Area    | Height | Area %  | Height % |
|-------|-----------|---------|--------|---------|----------|
| 1     | 73.803    | 2449192 | 21041  | 52.554  | 53.194   |
| 2     | 79.590    | 2211167 | 18514  | 47.446  | 46.806   |
| Total |           | 4660358 | 39555  | 100.000 | 100.000  |

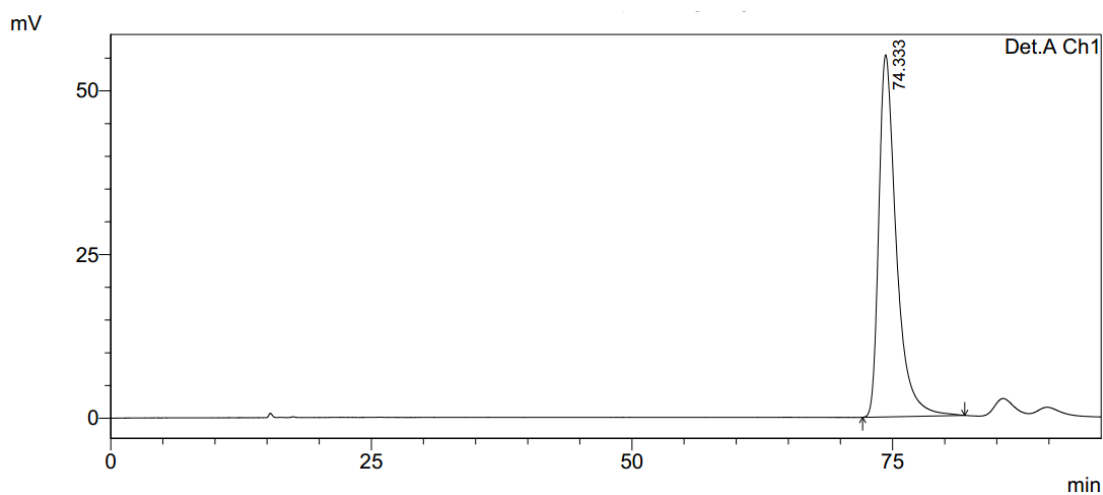

Detector A Ch1 254nm

| Peak# | Ret. Time | Area    | Height | Area %  | Height % |
|-------|-----------|---------|--------|---------|----------|
| 1     | 74.333    | 6447149 | 55326  | 100.000 | 100.000  |
| Total |           | 6447149 | 55326  | 100.000 | 100.000  |

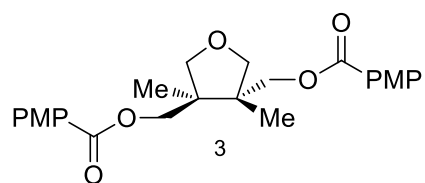

$^1\text{H}$  NMR and  $^{13}\text{C}$  NMR of **3**

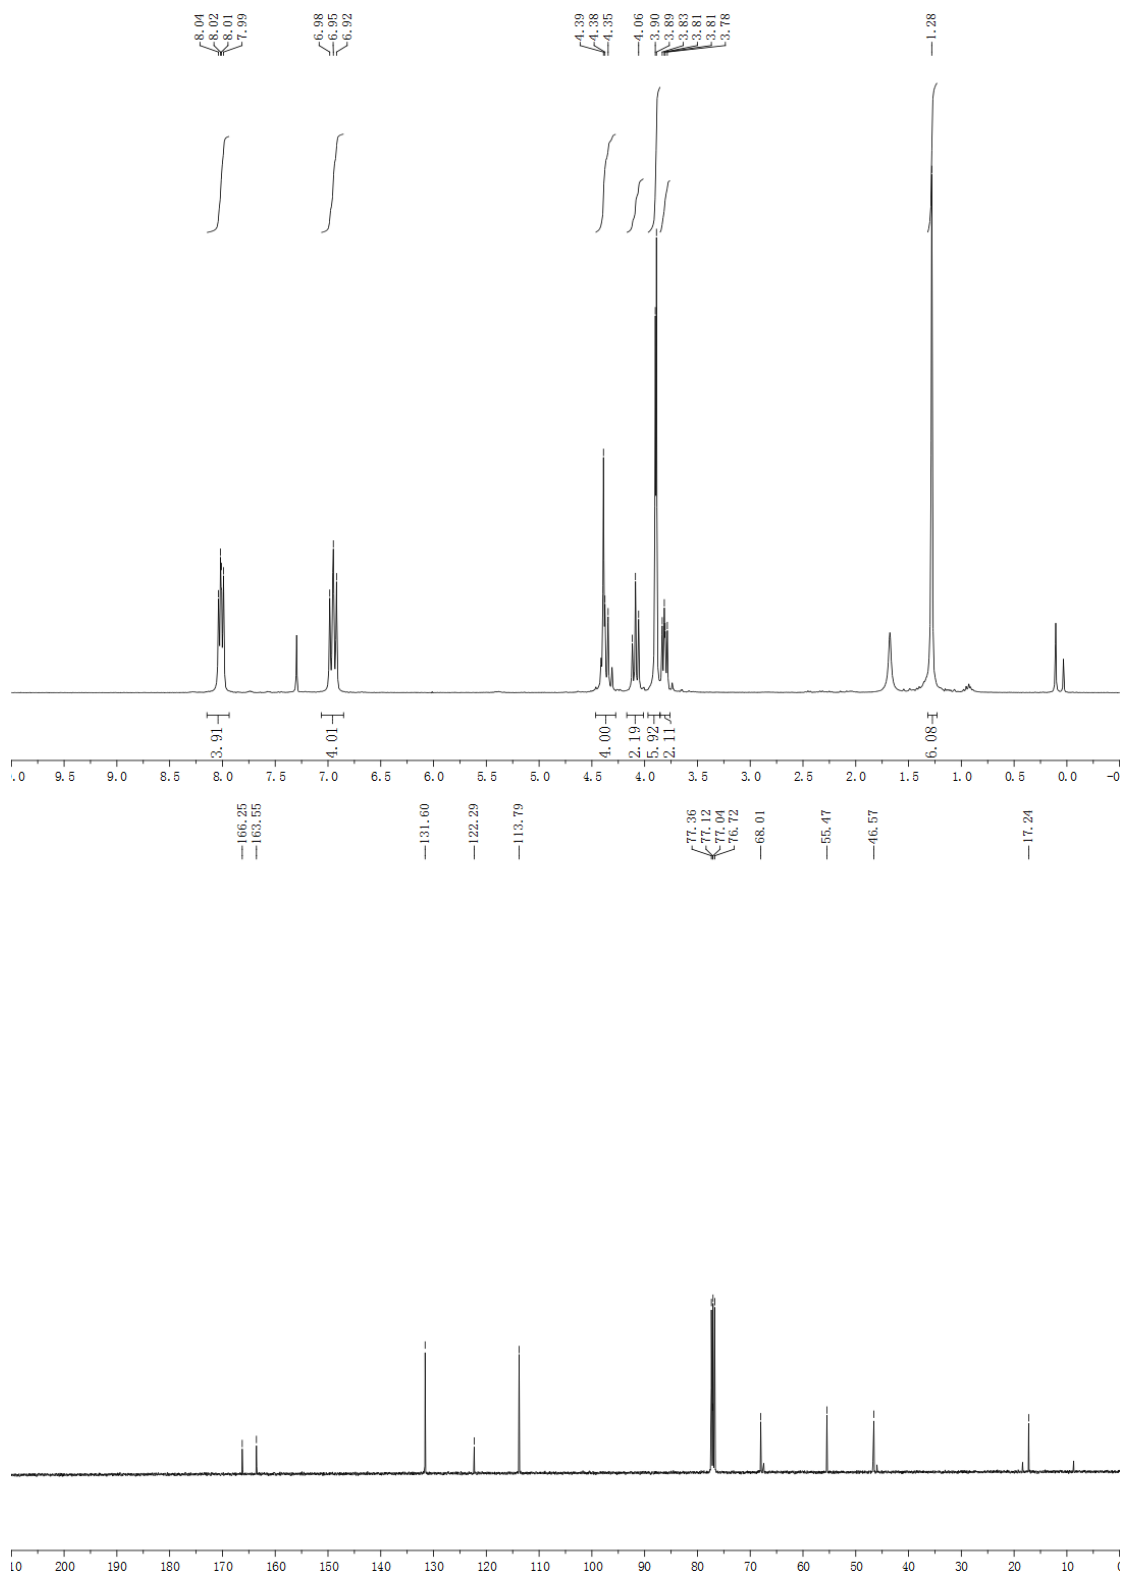

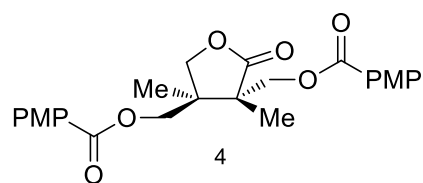

$^1\text{H}$  NMR and  $^{13}\text{C}$  NMR of **4**

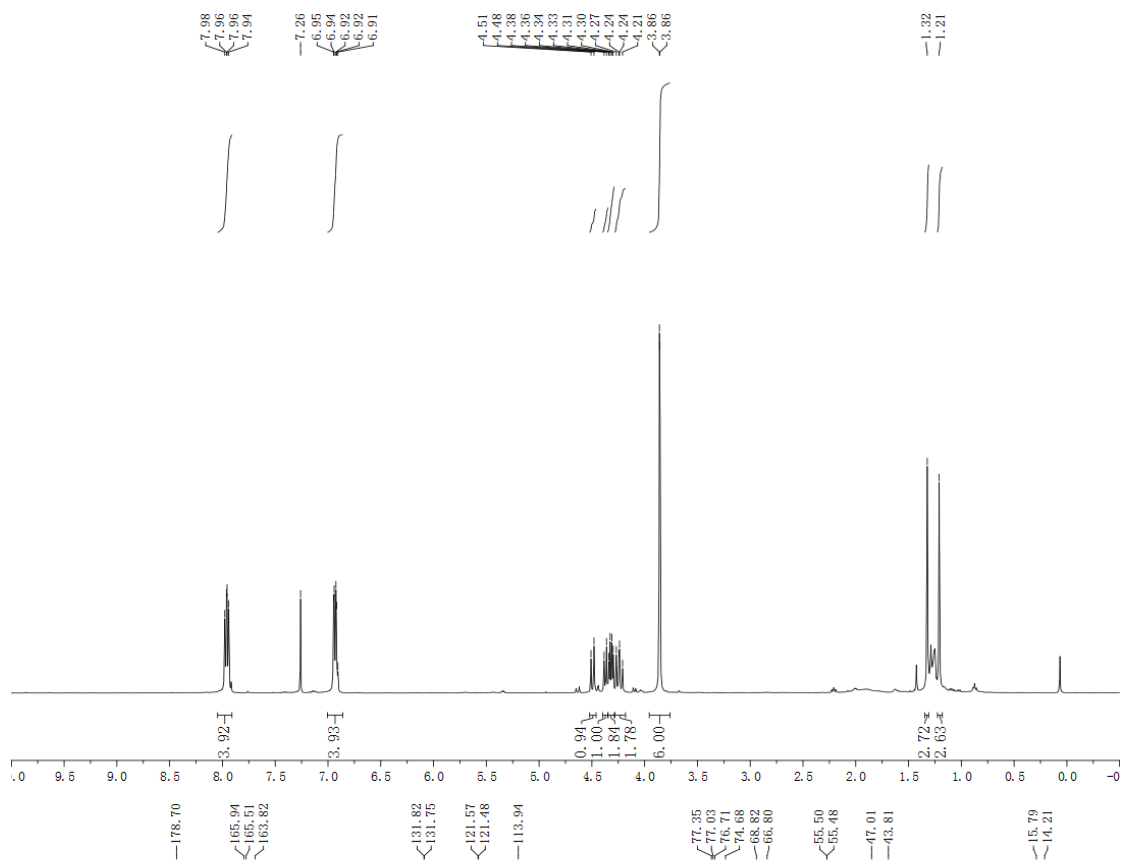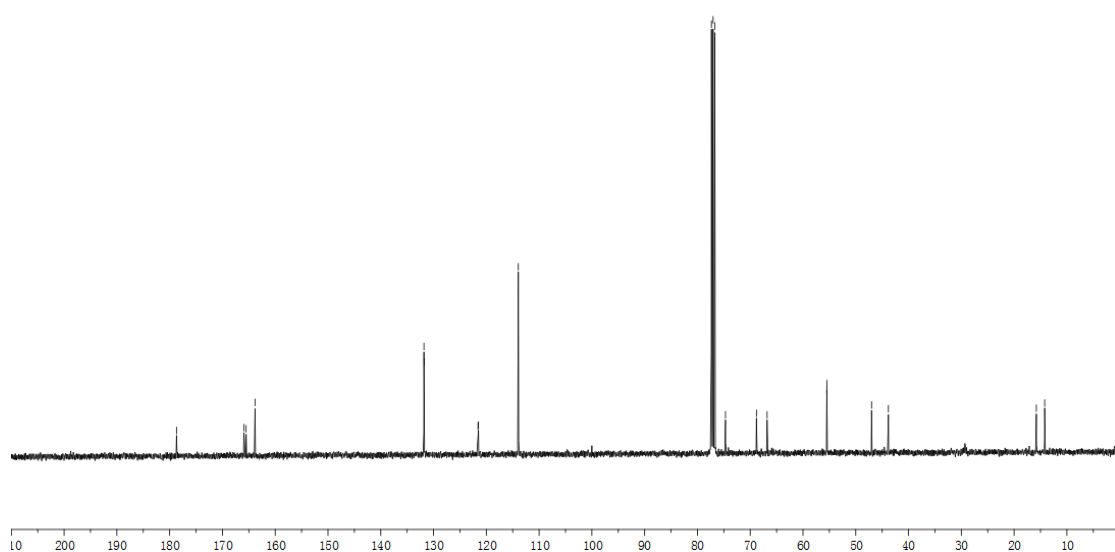

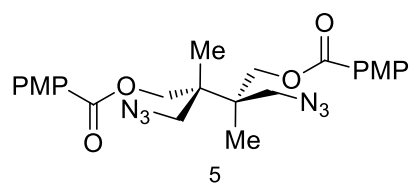

$^1\text{H}$  NMR and  $^{13}\text{C}$  NMR of **5**

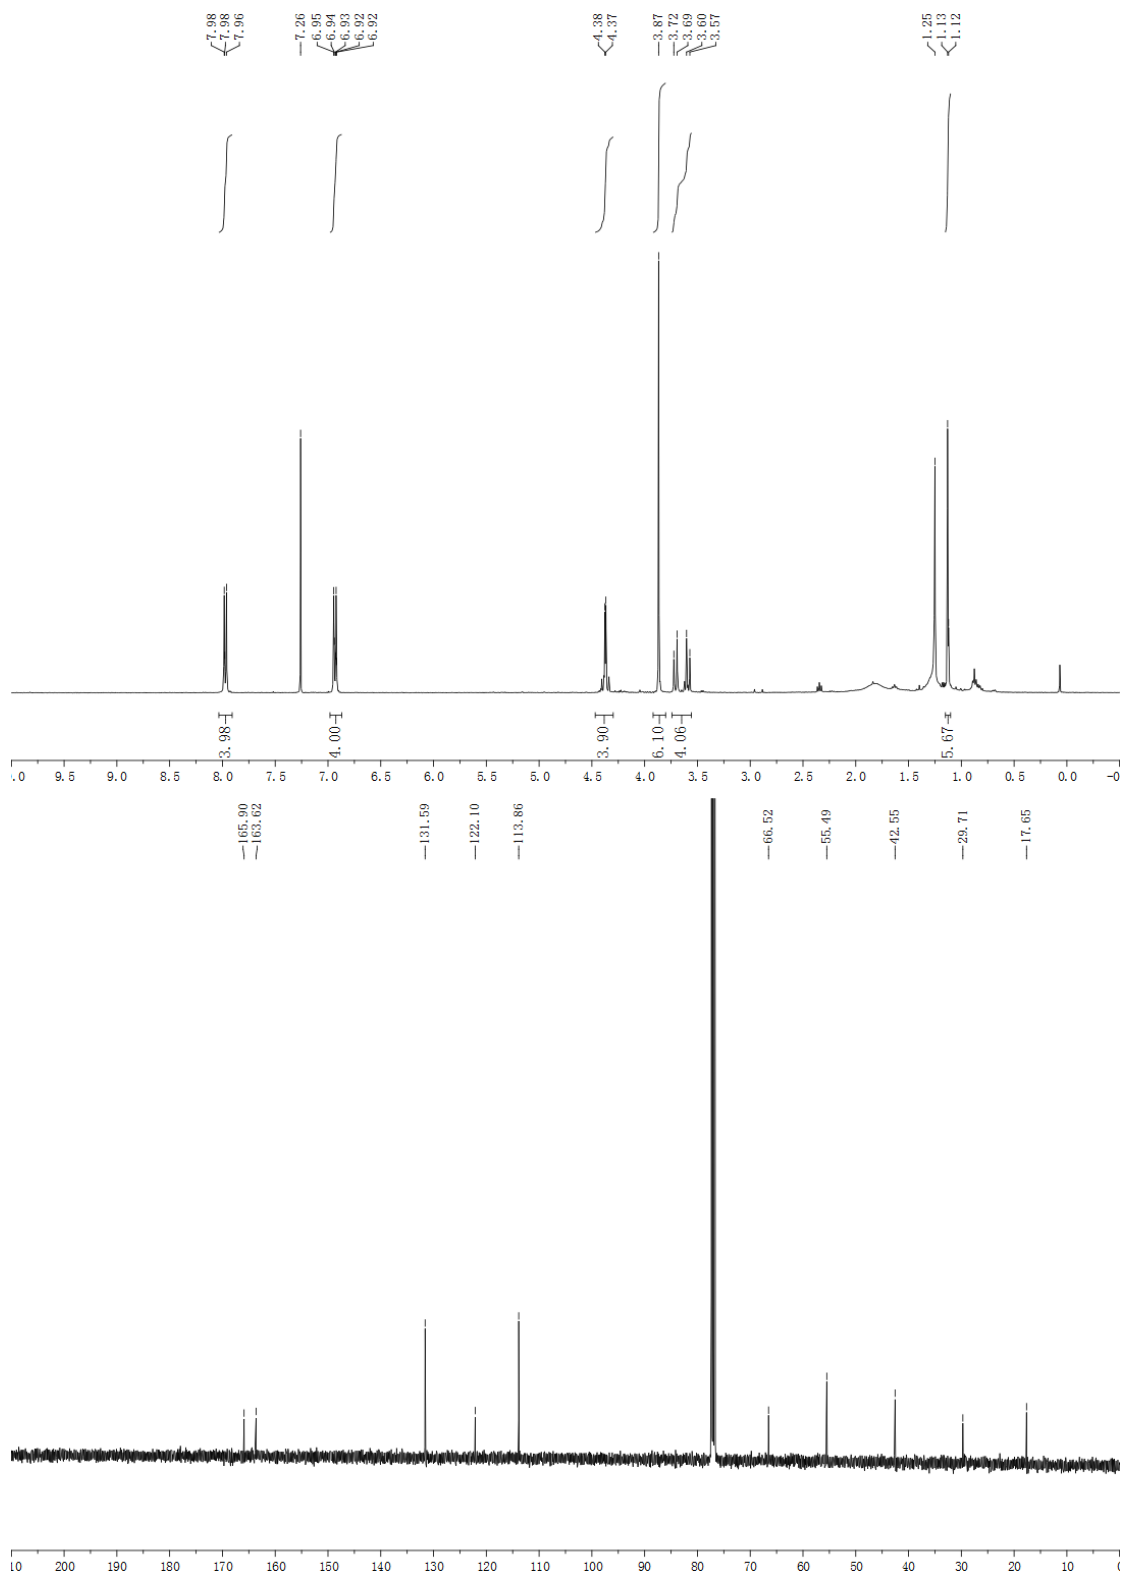



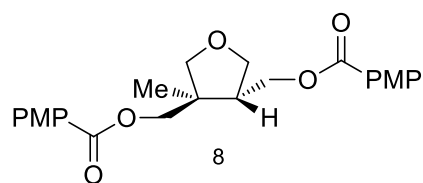

$^1\text{H}$  NMR and  $^{13}\text{C}$  NMR of **8**

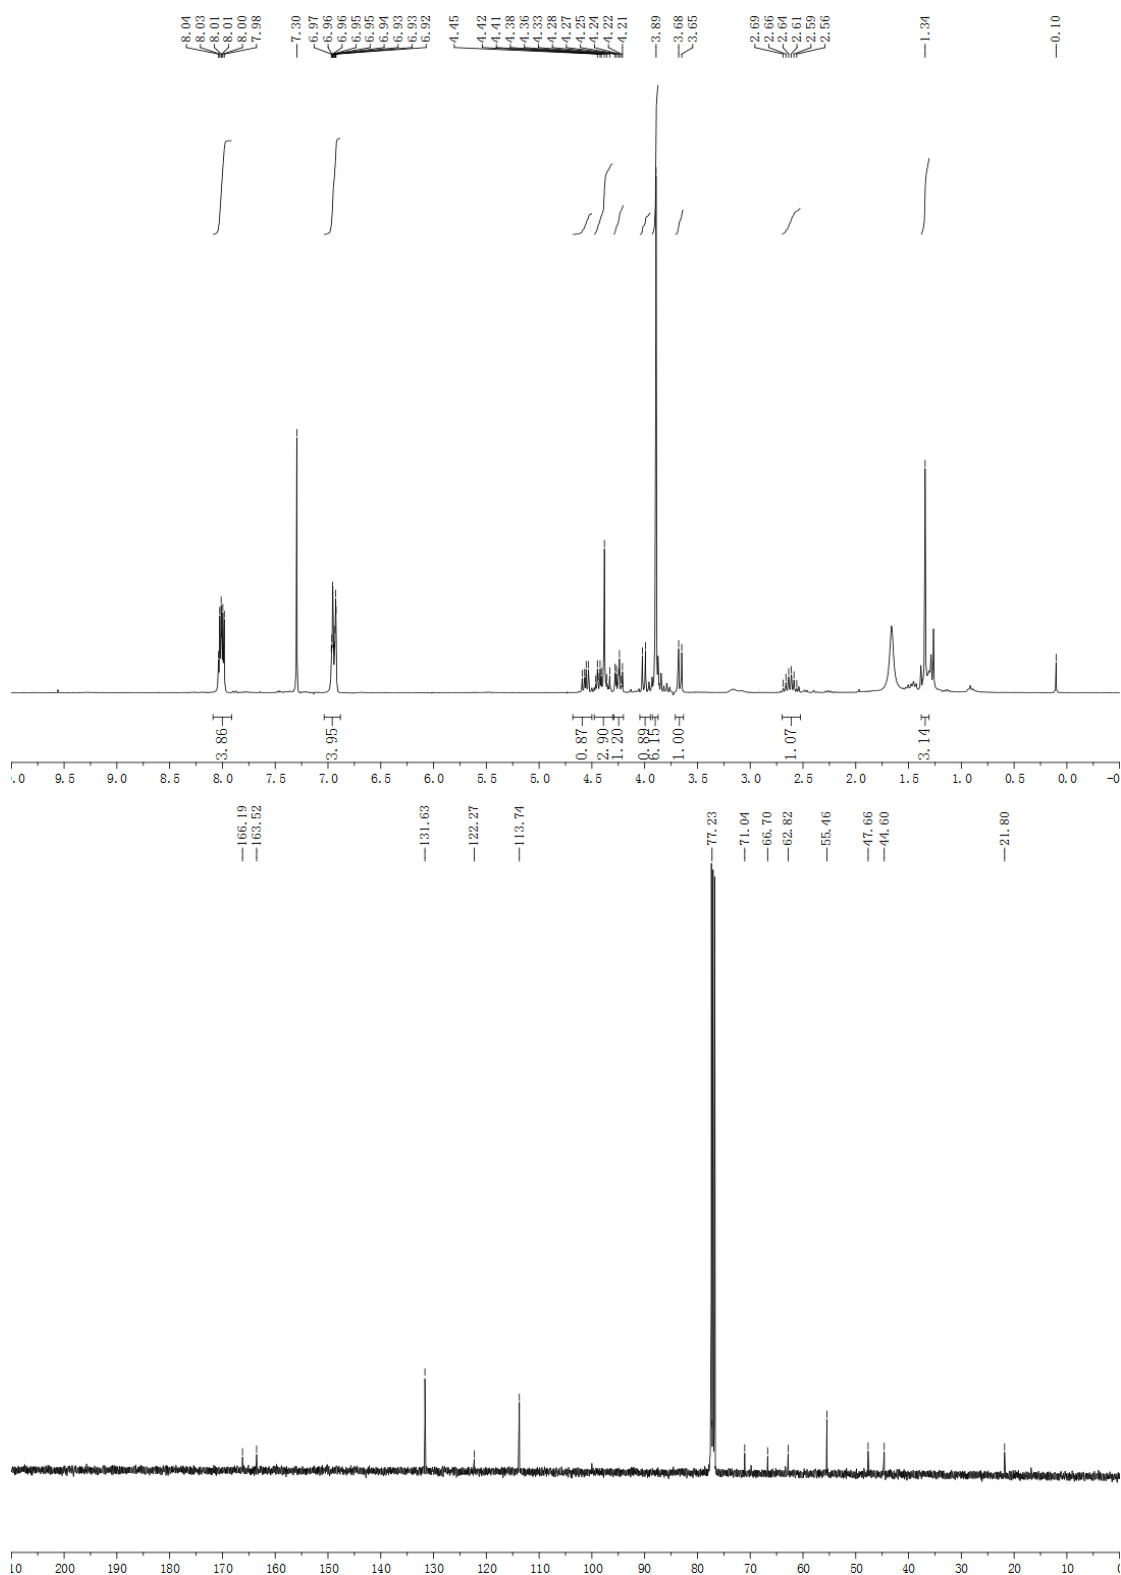

# HPLC of 8

mV

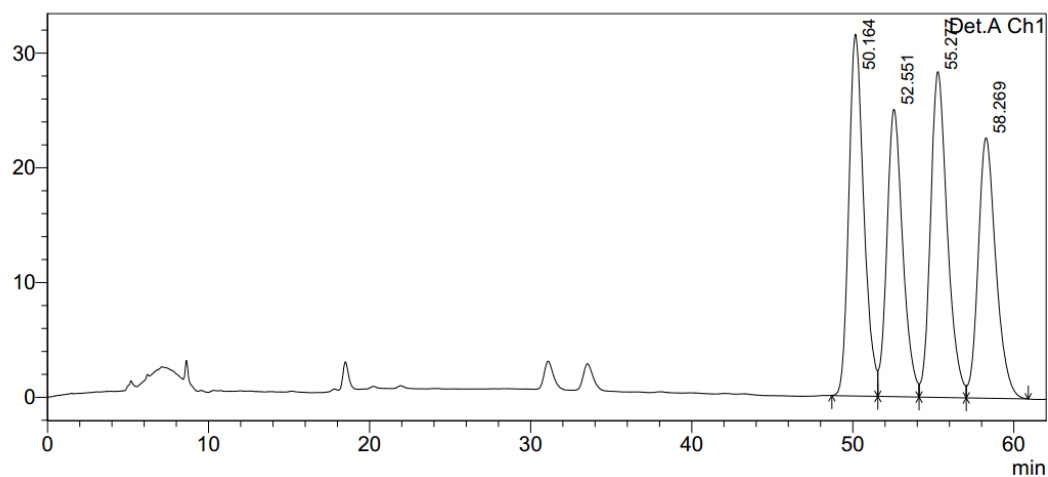

Detector A Ch1 254nm

| Peak# | Ret. Time | Area    | Height | Area %  | Height % |
|-------|-----------|---------|--------|---------|----------|
| 1     | 50.164    | 2034234 | 31542  | 26.961  | 29.295   |
| 2     | 52.551    | 1719091 | 25043  | 22.784  | 23.258   |
| 3     | 55.277    | 2057640 | 28388  | 27.271  | 26.365   |
| 4     | 58.269    | 1734157 | 22700  | 22.984  | 21.082   |
| Total |           | 7545123 | 107673 | 100.000 | 100.000  |

mV

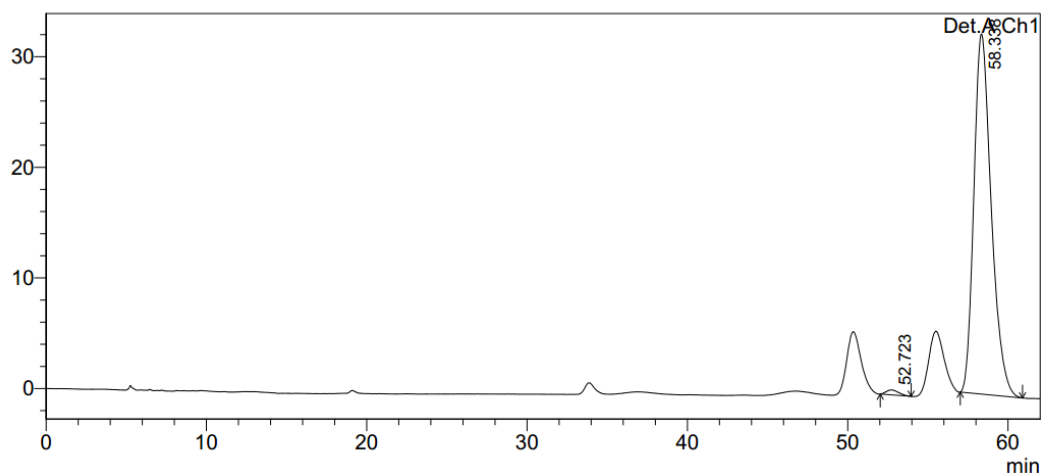

Detector A Ch1 254nm

| Peak# | Ret. Time | Area    | Height | Area %  | Height % |
|-------|-----------|---------|--------|---------|----------|
| 1     | 52.723    | 24141   | 451    | 0.975   | 1.365    |
| 2     | 58.338    | 2450693 | 32556  | 99.025  | 98.635   |
| Total |           | 2474834 | 33006  | 100.000 | 100.000  |

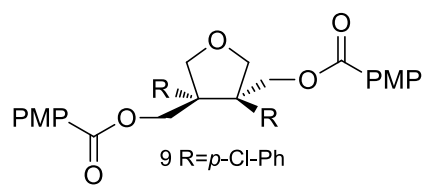

$^1\text{H}$  NMR and  $^{13}\text{C}$  NMR of **9**

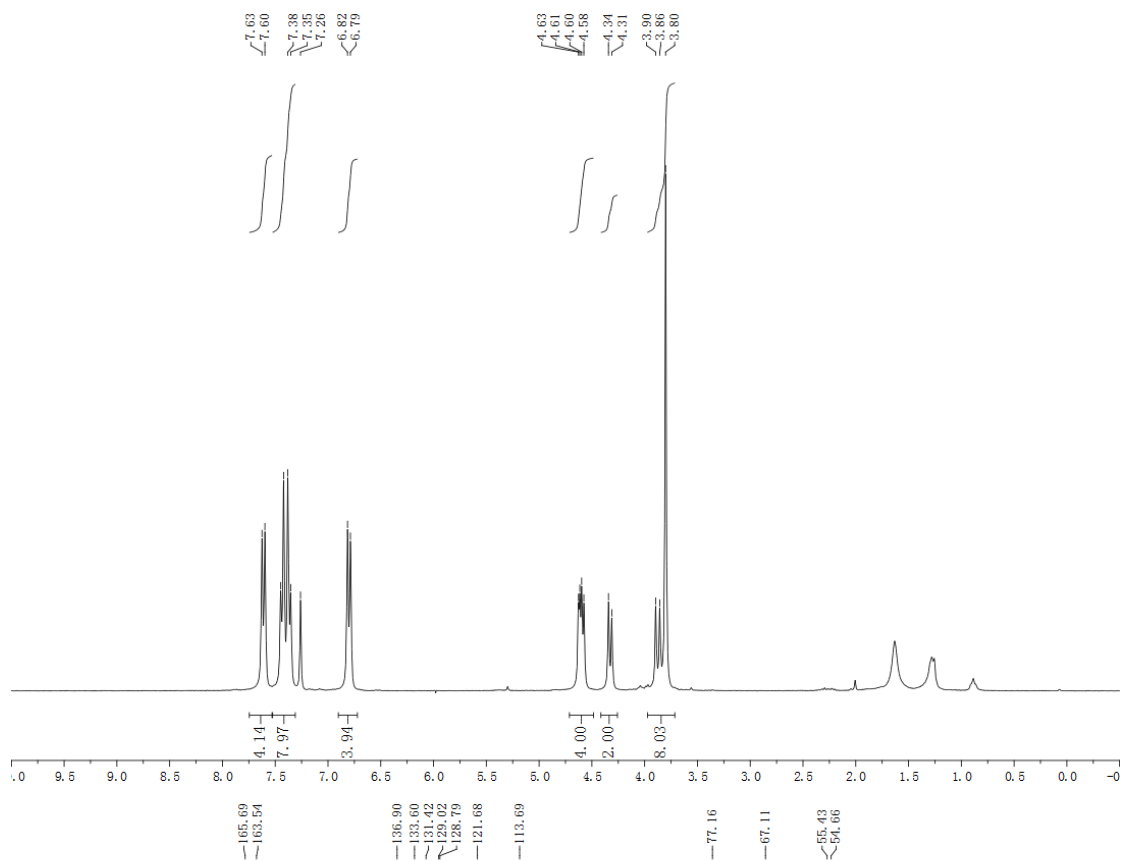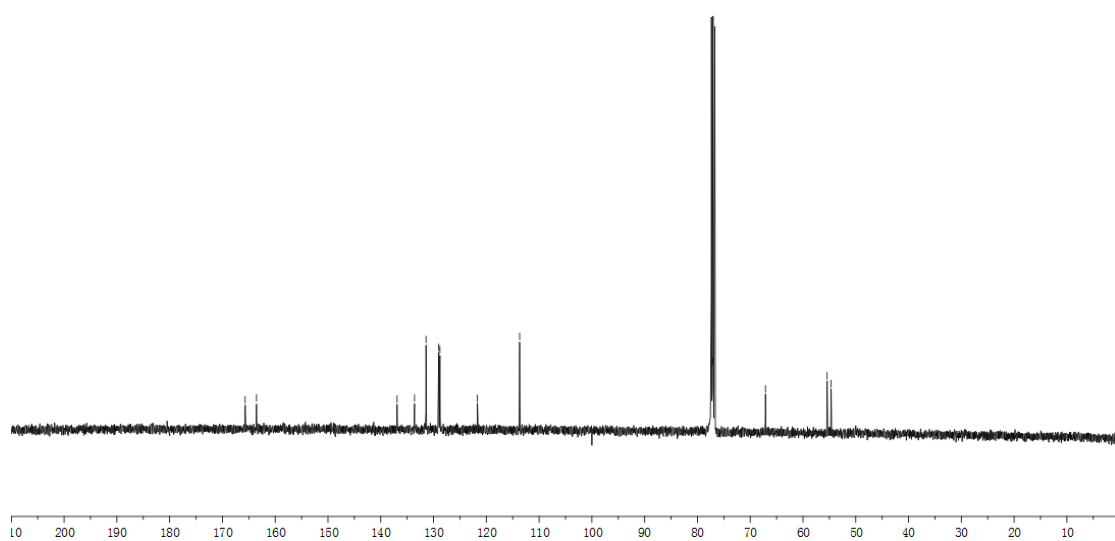

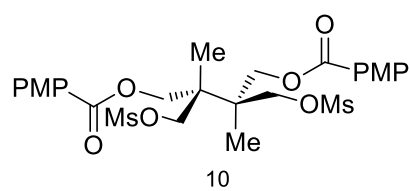

$^1\text{H}$  NMR and  $^{13}\text{C}$  NMR of **10**

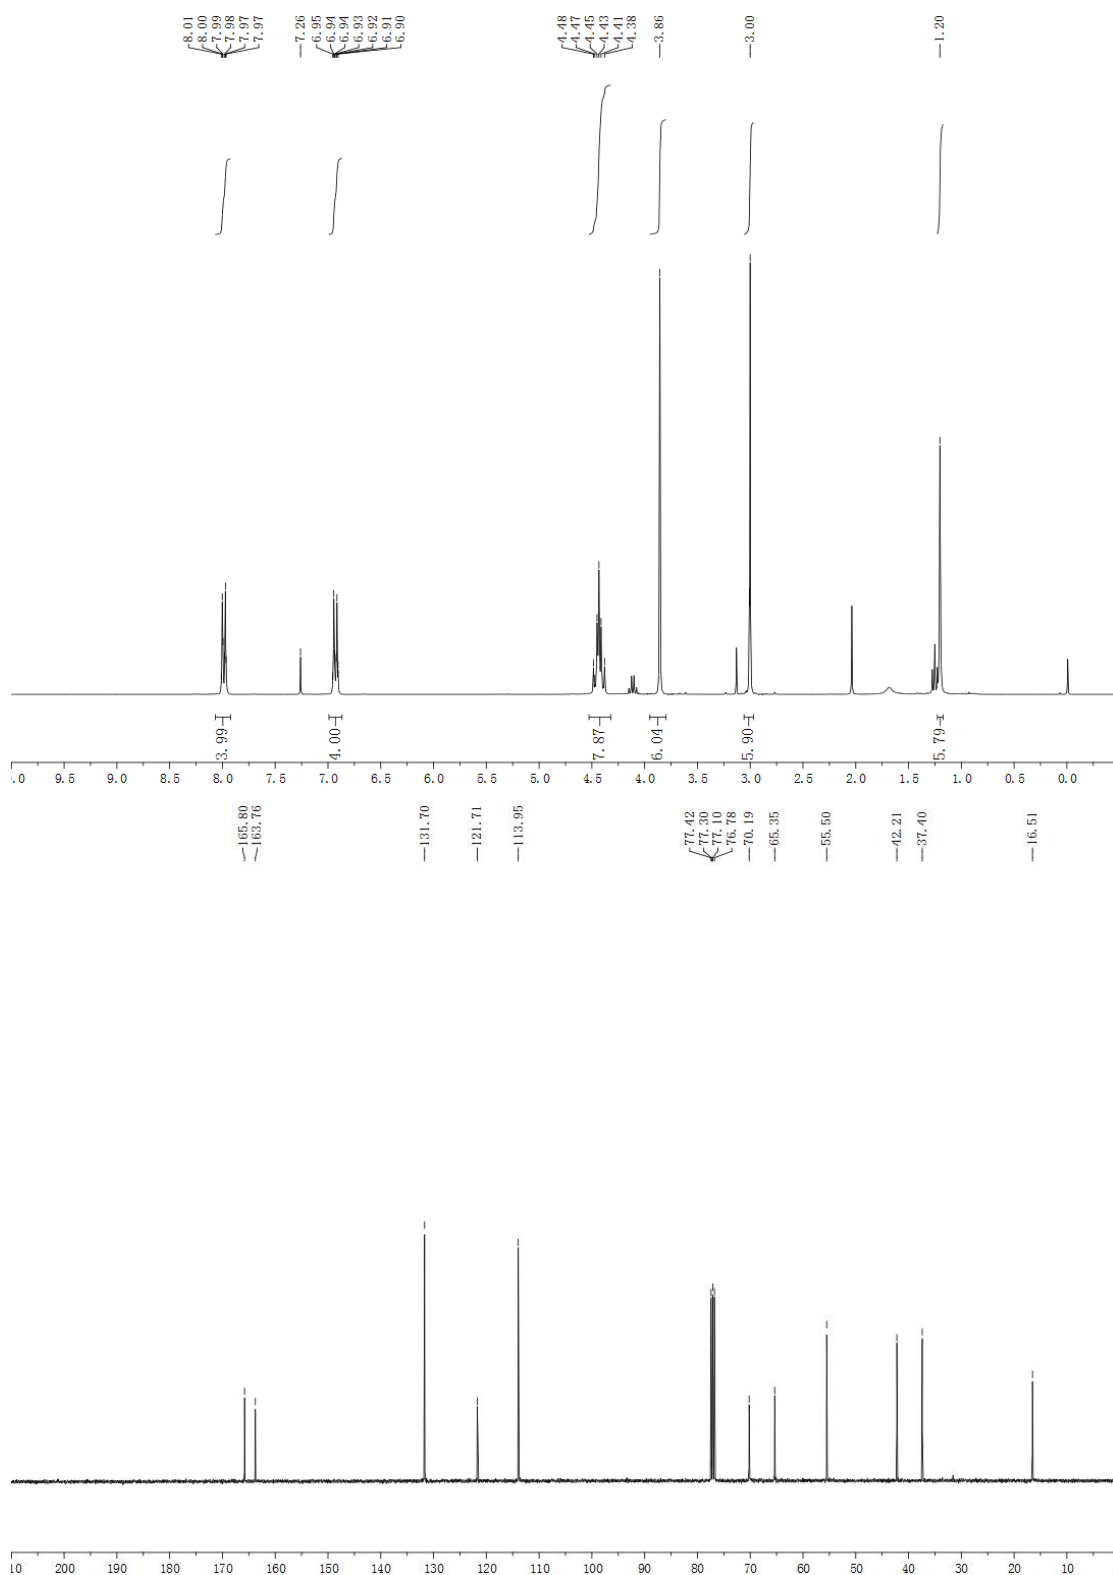

Supplement: c7cc00457e1.pdf [file c7cc00457e1.pdf]
